# Supplementary material for: Ischemic Duration is More Critical than Reperfusion Efficacy in Driving Early Neuroinflammation and Motor Deficits after Transient Middle Cerebral Artery Occlusion
Source: Research Square preprint supplement (doi:10.21203/rs.3.rs-8712806/v1), 2026-02-09
Supplement: Supplementary file 1 [file 55c9186b90cdb12d28fc6818.xlsx]

## Sheet: Table S2 - Correlation
Variable 1	Variable 2	R Squared	P Value
Baseline % Time Moving	Baseline % Time Moving	1	0
Baseline % Time Moving	Baseline Border-Center Transitions	0.74981	3.82897e-42
Baseline % Time Moving	Baseline Laterality	0.0101117	0.251286
Baseline % Time Moving	24h Distance Traveled	0.151714	4.25941e-06
Baseline % Time Moving	24h Average Speed	0.152586	3.97571e-06
Baseline % Time Moving	24h % Time Moving	0.160756	2.07803e-06
Baseline % Time Moving	24h Border-Center Transitions	0.0252298	0.0699721
Baseline % Time Moving	24h Laterality	0.0033726	0.513288
Baseline % Time Moving	72h Distance Traveled	0.194302	9.77763e-06
Baseline % Time Moving	72h Average Speed	0.194844	9.47075e-06
Baseline % Time Moving	72h % Time Moving	0.221614	1.91732e-06
Baseline % Time Moving	72h Border-Center Transitions	0.0521997	0.0276136
Baseline % Time Moving	72h Laterality	0.0286342	0.106847
Baseline % Time Moving	24h-BL Distance Traveled FC	0.0213464	0.0958811
Baseline % Time Moving	24h-BL Average Speed FC	0.0211814	0.0971886
Baseline % Time Moving	24h-BL % Time Moving FC	0.0165693	0.147599
Baseline % Time Moving	24h-BL Border-Center Transitions FC	0.0237575	0.0787874
Baseline % Time Moving	24h-BL Delta Laterality	0.0144418	0.173228
Baseline % Time Moving	72h-BL Distance Traveled FC	0.0588537	0.0191292
Baseline % Time Moving	72h-BL Average Speed FC	0.0581361	0.0198996
Baseline % Time Moving	72h-BL % Time Moving FC	0.0361169	0.0727963
Baseline % Time Moving	72h-BL Border-Center Transitions FC	0.0822743	0.00531075
Baseline % Time Moving	72h-BL Delta Laterality	0.0218397	0.157461
Baseline % Time Moving	72h-24h Distance Traveled FC	0.0411516	0.0711249
Baseline % Time Moving	72h-24h Average Speed FC	0.0406655	0.0728511
Baseline % Time Moving	72h-24h % Time Moving FC	0.000222275	0.913157
Baseline % Time Moving	72h-24h Border-Center Transitions FC	3.22954e-05	0.966843
Baseline % Time Moving	72h-24h Delta Laterality	0.0263428	0.128605
Baseline % Time Moving	Baseline % Red Pixels	0.00279915	0.620423
Baseline % Time Moving	Ischemia % Red Pixels	0.00123444	0.742338
Baseline % Time Moving	Reperfusion % Red Pixels	0.01922	0.192528
Baseline % Time Moving	Endpoint % Red Pixels	0.0232303	0.156298
Baseline % Time Moving	Baseline % Yellow Pixels	6.17524e-08	0.998145
Baseline % Time Moving	Ischemia % Yellow Pixels	0.00273789	0.62428
Baseline % Time Moving	Reperfusion % Yellow Pixels	0.013313	0.278839
Baseline % Time Moving	Endpoint % Yellow Pixels	0.057885	0.0239475
Baseline % Time Moving	Baseline % Green Pixels	0.000752591	0.797436
Baseline % Time Moving	Ischemia % Green Pixels	0.00545184	0.48917
Baseline % Time Moving	Reperfusion % Green Pixels	0.0204633	0.178609
Baseline % Time Moving	Endpoint % Green Pixels	0.0198385	0.190559
Baseline % Time Moving	Baseline % Cyan Pixels	0.000455878	0.841678
Baseline % Time Moving	Ischemia % Cyan Pixels	0.000751973	0.797518
Baseline % Time Moving	Reperfusion % Cyan Pixels	0.0178349	0.209529
Baseline % Time Moving	Endpoint % Cyan Pixels	0.000172449	0.903348
Baseline % Time Moving	Baseline % Blue Pixels	0.00819061	0.396261
Baseline % Time Moving	Ischemia % Blue Pixels	0.000247221	0.883063
Baseline % Time Moving	Reperfusion % Blue Pixels	0.0037409	0.56687
Baseline % Time Moving	Endpoint % Blue Pixels	0.000478893	0.839623
Baseline % Time Moving	Baseline Speckle Score	0.0049836	0.508495
Baseline % Time Moving	Ischemia Speckle Score	0.000768717	0.795325
Baseline % Time Moving	Reperfusion Speckle Score	0.019213	0.19261
Baseline % Time Moving	Endpoint Speckle Score	0.0117795	0.31415
Baseline % Time Moving	Baseline ROI Perfusion	0.00135042	0.735423
Baseline % Time Moving	Ischemia ROI Perfusion	0.0102122	0.35168
Baseline % Time Moving	Reperfusion ROI Perfusion	0.000109496	0.923367
Baseline % Time Moving	Endpoint ROI Perfusion	0.000157415	0.908177
Baseline % Time Moving	Reperfusion ROI % Baseline	0.00355531	0.583278
Baseline % Time Moving	24h PMN Count	0.00446049	0.805875
Baseline % Time Moving	24h MG/MΦ Count	0.0868336	0.352487
Baseline % Time Moving	72h PMN Count	0.202988	0.0066071
Baseline % Time Moving	72h MG/MΦ Count	0.0582901	0.22505
Baseline % Time Moving	24h MG/MΦ Volume	0.0796417	0.374162
Baseline % Time Moving	24h MG/MΦ Sphericity	0.00571971	0.815294
Baseline % Time Moving	24h MG/MΦ Distance to PMN	0.0901526	0.369658
Baseline % Time Moving	24h PMN Volume	0.0294431	0.613925
Baseline % Time Moving	24h PMN Sphericity	0.0155933	0.714497
Baseline % Time Moving	24h PMN Distance to Vessel	0.0607577	0.492385
Baseline % Time Moving	24h % Intravascular PMNs	0.118023	0.331086
Baseline % Time Moving	72h MG/MΦ Volume	0.0800397	0.144627
Baseline % Time Moving	72h MG/MΦ Sphericity	0.0620493	0.201156
Baseline % Time Moving	72h MG/MΦ Distance to PMN	0.127945	0.0669772
Baseline % Time Moving	72h PMN Volume	0.136944	0.0574367
Baseline % Time Moving	72h PMN Sphericity	0.0530901	0.24758
Baseline % Time Moving	72h PMN Distance to Vessel	0.00961003	0.656323
Baseline % Time Moving	72h % Intravascular PMNs	0.0118465	0.621059
Baseline Border-Center Transitions	Baseline Border-Center Transitions	1	0
Baseline Border-Center Transitions	Baseline Laterality	0.00226578	0.587825
Baseline Border-Center Transitions	24h Distance Traveled	0.0956665	0.000324724
Baseline Border-Center Transitions	24h Average Speed	0.0956703	0.000324631
Baseline Border-Center Transitions	24h % Time Moving	0.0938159	0.000373684
Baseline Border-Center Transitions	24h Border-Center Transitions	0.0286712	0.0531832
Baseline Border-Center Transitions	24h Laterality	0.000649231	0.774398
Baseline Border-Center Transitions	72h Distance Traveled	0.14377	0.000178179
Baseline Border-Center Transitions	72h Average Speed	0.144237	0.00017356
Baseline Border-Center Transitions	72h % Time Moving	0.163304	5.89148e-05
Baseline Border-Center Transitions	72h Border-Center Transitions	0.0630144	0.0152213
Baseline Border-Center Transitions	72h Laterality	0.0231742	0.147439
Baseline Border-Center Transitions	24h-BL Distance Traveled FC	0.0155148	0.156337
Baseline Border-Center Transitions	24h-BL Average Speed FC	0.015563	0.155691
Baseline Border-Center Transitions	24h-BL % Time Moving FC	0.0148924	0.169985
Baseline Border-Center Transitions	24h-BL Border-Center Transitions FC	0.0248339	0.0722346
Baseline Border-Center Transitions	24h-BL Delta Laterality	0.00609484	0.377301
Baseline Border-Center Transitions	72h-BL Distance Traveled FC	0.0614632	0.0165737
Baseline Border-Center Transitions	72h-BL Average Speed FC	0.0607524	0.0172334
Baseline Border-Center Transitions	72h-BL % Time Moving FC	0.0431789	0.0493827
Baseline Border-Center Transitions	72h-BL Border-Center Transitions FC	0.13278	0.000329649
Baseline Border-Center Transitions	72h-BL Delta Laterality	0.0209029	0.166762
Baseline Border-Center Transitions	72h-24h Distance Traveled FC	0.0433951	0.0636963
Baseline Border-Center Transitions	72h-24h Average Speed FC	0.0429015	0.0652579
Baseline Border-Center Transitions	72h-24h % Time Moving FC	0.015306	0.36365
Baseline Border-Center Transitions	72h-24h Border-Center Transitions FC	0.0192059	0.308387
Baseline Border-Center Transitions	72h-24h Delta Laterality	0.032387	0.091491
Baseline Border-Center Transitions	Baseline % Red Pixels	0.0100937	0.3461
Baseline Border-Center Transitions	Ischemia % Red Pixels	0.00326719	0.592567
Baseline Border-Center Transitions	Reperfusion % Red Pixels	0.0108872	0.327722
Baseline Border-Center Transitions	Endpoint % Red Pixels	0.00566884	0.485684
Baseline Border-Center Transitions	Baseline % Yellow Pixels	0.00642374	0.452692
Baseline Border-Center Transitions	Ischemia % Yellow Pixels	0.00357126	0.575814
Baseline Border-Center Transitions	Reperfusion % Yellow Pixels	0.00902309	0.373158
Baseline Border-Center Transitions	Endpoint % Yellow Pixels	0.0248433	0.142478
Baseline Border-Center Transitions	Baseline % Green Pixels	0.00298337	0.609133
Baseline Border-Center Transitions	Ischemia % Green Pixels	0.00859439	0.384811
Baseline Border-Center Transitions	Reperfusion % Green Pixels	0.00759064	0.414195
Baseline Border-Center Transitions	Endpoint % Green Pixels	0.00297719	0.613622
Baseline Border-Center Transitions	Baseline % Cyan Pixels	0.0161141	0.233157
Baseline Border-Center Transitions	Ischemia % Cyan Pixels	0.00344325	0.58275
Baseline Border-Center Transitions	Reperfusion % Cyan Pixels	0.0129198	0.286103
Baseline Border-Center Transitions	Endpoint % Cyan Pixels	0.000119876	0.919357
Baseline Border-Center Transitions	Baseline % Blue Pixels	0.00784016	0.406596
Baseline Border-Center Transitions	Ischemia % Blue Pixels	6.10307e-05	0.941744
Baseline Border-Center Transitions	Reperfusion % Blue Pixels	0.0240112	0.144755
Baseline Border-Center Transitions	Endpoint % Blue Pixels	0.000357777	0.861145
Baseline Border-Center Transitions	Baseline Speckle Score	0.00951927	0.360273
Baseline Border-Center Transitions	Ischemia Speckle Score	0.00240203	0.646427
Baseline Border-Center Transitions	Reperfusion Speckle Score	0.01229	0.298236
Baseline Border-Center Transitions	Endpoint Speckle Score	0.00209315	0.6721
Baseline Border-Center Transitions	Baseline ROI Perfusion	0.000454222	0.84466
Baseline Border-Center Transitions	Ischemia ROI Perfusion	0.0259796	0.135849
Baseline Border-Center Transitions	Reperfusion ROI Perfusion	0.00444576	0.539476
Baseline Border-Center Transitions	Endpoint ROI Perfusion	0.00453638	0.535362
Baseline Border-Center Transitions	Reperfusion ROI % Baseline	0.0319806	0.0974609
Baseline Border-Center Transitions	24h PMN Count	0.000348487	0.945293
Baseline Border-Center Transitions	24h MG/MΦ Count	0.107316	0.29859
Baseline Border-Center Transitions	72h PMN Count	0.236254	0.00307325
Baseline Border-Center Transitions	72h MG/MΦ Count	0.0998024	0.10843
Baseline Border-Center Transitions	24h MG/MΦ Volume	5.70735e-06	0.994121
Baseline Border-Center Transitions	24h MG/MΦ Sphericity	0.0359404	0.555103
Baseline Border-Center Transitions	24h MG/MΦ Distance to PMN	0.315974	0.0718846
Baseline Border-Center Transitions	24h PMN Volume	0.0359802	0.576419
Baseline Border-Center Transitions	24h PMN Sphericity	0.0594815	0.46986
Baseline Border-Center Transitions	24h PMN Distance to Vessel	0.00356297	0.869891
Baseline Border-Center Transitions	24h % Intravascular PMNs	0.00991362	0.784343
Baseline Border-Center Transitions	72h MG/MΦ Volume	0.117055	0.0747358
Baseline Border-Center Transitions	72h MG/MΦ Sphericity	0.114218	0.0785832
Baseline Border-Center Transitions	72h MG/MΦ Distance to PMN	0.156176	0.0413294
Baseline Border-Center Transitions	72h PMN Volume	0.0921759	0.123675
Baseline Border-Center Transitions	72h PMN Sphericity	0.0346059	0.352874
Baseline Border-Center Transitions	72h PMN Distance to Vessel	0.0829785	0.182563
Baseline Border-Center Transitions	72h % Intravascular PMNs	0.0234606	0.485339
Baseline Laterality	Baseline Laterality	1	0
Baseline Laterality	24h Distance Traveled	0.0014469	0.671141
Baseline Laterality	24h Average Speed	0.00148697	0.666885
Baseline Laterality	24h % Time Moving	0.00264199	0.566032
Baseline Laterality	24h Border-Center Transitions	0.00650319	0.367441
Baseline Laterality	24h Laterality	0.00106671	0.717664
Baseline Laterality	72h Distance Traveled	0.000233415	0.886352
Baseline Laterality	72h Average Speed	0.000201358	0.894396
Baseline Laterality	72h % Time Moving	0.000305046	0.870212
Baseline Laterality	72h Border-Center Transitions	0.000130753	0.914816
Baseline Laterality	72h Laterality	0.00844747	0.391646
Baseline Laterality	24h-BL Distance Traveled FC	0.00312164	0.532691
Baseline Laterality	24h-BL Average Speed FC	0.00317708	0.529069
Baseline Laterality	24h-BL % Time Moving FC	0.00211233	0.612242
Baseline Laterality	24h-BL Border-Center Transitions FC	0.00724519	0.34136
Baseline Laterality	24h-BL Delta Laterality	0.413524	3.59161e-16
Baseline Laterality	72h-BL Distance Traveled FC	0.00523775	0.49785
Baseline Laterality	72h-BL Average Speed FC	0.00553506	0.485864
Baseline Laterality	72h-BL % Time Moving FC	0.000892494	0.78356
Baseline Laterality	72h-BL Border-Center Transitions FC	0.00251475	0.638795
Baseline Laterality	72h-BL Delta Laterality	0.435502	1.49987e-12
Baseline Laterality	72h-24h Distance Traveled FC	0.000804464	0.805294
Baseline Laterality	72h-24h Average Speed FC	0.000903993	0.793852
Baseline Laterality	72h-24h % Time Moving FC	0.0066426	0.55416
Baseline Laterality	72h-24h Border-Center Transitions FC	0.00131928	0.792342
Baseline Laterality	72h-24h Delta Laterality	0.00041311	0.852642
Baseline Laterality	Baseline % Red Pixels	0.00537849	0.497105
Baseline Laterality	Ischemia % Red Pixels	0.00366702	0.575168
Baseline Laterality	Reperfusion % Red Pixels	0.0353609	0.0793475
Baseline Laterality	Endpoint % Red Pixels	0.0297909	0.109899
Baseline Laterality	Baseline % Yellow Pixels	0.0114292	0.321498
Baseline Laterality	Ischemia % Yellow Pixels	0.0141172	0.270216
Baseline Laterality	Reperfusion % Yellow Pixels	0.0189724	0.200632
Baseline Laterality	Endpoint % Yellow Pixels	0.0305913	0.105165
Baseline Laterality	Baseline % Green Pixels	0.00132692	0.736162
Baseline Laterality	Ischemia % Green Pixels	0.00161653	0.709949
Baseline Laterality	Reperfusion % Green Pixels	0.041587	0.056683
Baseline Laterality	Endpoint % Green Pixels	0.0268622	0.129293
Baseline Laterality	Baseline % Cyan Pixels	2.43306e-05	0.963621
Baseline Laterality	Ischemia % Cyan Pixels	0.00101952	0.767748
Baseline Laterality	Reperfusion % Cyan Pixels	0.0395786	0.0631416
Baseline Laterality	Endpoint % Cyan Pixels	0.015188	0.255447
Baseline Laterality	Baseline % Blue Pixels	0.00254212	0.64085
Baseline Laterality	Ischemia % Blue Pixels	1.7074e-06	0.99036
Baseline Laterality	Reperfusion % Blue Pixels	0.00913783	0.375649
Baseline Laterality	Endpoint % Blue Pixels	0.00515701	0.508621
Baseline Laterality	Baseline Speckle Score	0.0031367	0.604263
Baseline Laterality	Ischemia Speckle Score	0.00127362	0.741324
Baseline Laterality	Reperfusion Speckle Score	0.0375809	0.0703335
Baseline Laterality	Endpoint Speckle Score	0.024423	0.148322
Baseline Laterality	Baseline ROI Perfusion	0.00520812	0.509048
Baseline Laterality	Ischemia ROI Perfusion	7.54158e-05	0.936748
Baseline Laterality	Reperfusion ROI Perfusion	0.0226863	0.166279
Baseline Laterality	Endpoint ROI Perfusion	0.00816751	0.407938
Baseline Laterality	Reperfusion ROI % Baseline	0.0317186	0.100884
Baseline Laterality	24h PMN Count	0.000203207	0.958212
Baseline Laterality	24h MG/MΦ Count	0.0125257	0.729125
Baseline Laterality	72h PMN Count	0.00321236	0.754063
Baseline Laterality	72h MG/MΦ Count	0.0108197	0.620735
Baseline Laterality	24h MG/MΦ Volume	0.00317207	0.861982
Baseline Laterality	24h MG/MΦ Sphericity	0.0540959	0.466948
Baseline Laterality	24h MG/MΦ Distance to PMN	0.199776	0.168117
Baseline Laterality	24h PMN Volume	0.0963171	0.352969
Baseline Laterality	24h PMN Sphericity	0.0102741	0.766817
Baseline Laterality	24h PMN Distance to Vessel	0.0239162	0.669681
Baseline Laterality	24h % Intravascular PMNs	0.0635563	0.482257
Baseline Laterality	72h MG/MΦ Volume	0.0293955	0.402332
Baseline Laterality	72h MG/MΦ Sphericity	0.190624	0.0257453
Baseline Laterality	72h MG/MΦ Distance to PMN	0.0354751	0.367251
Baseline Laterality	72h PMN Volume	0.00224087	0.822215
Baseline Laterality	72h PMN Sphericity	0.00254407	0.810768
Baseline Laterality	72h PMN Distance to Vessel	0.101025	0.160296
Baseline Laterality	72h % Intravascular PMNs	0.258532	0.0185918
24h Distance Traveled	24h Distance Traveled	1	0
24h Distance Traveled	24h Average Speed	0.999528	2.03906e-216
24h Distance Traveled	24h % Time Moving	0.899709	2.81629e-66
24h Distance Traveled	24h Border-Center Transitions	0.693247	6.63354e-35
24h Distance Traveled	24h Laterality	0.0284747	0.0559214
24h Distance Traveled	72h Distance Traveled	0.168624	7.07296e-05
24h Distance Traveled	72h Average Speed	0.169046	6.91254e-05
24h Distance Traveled	72h % Time Moving	0.166744	7.8332e-05
24h Distance Traveled	72h Border-Center Transitions	0.0721536	0.0113904
24h Distance Traveled	72h Laterality	4.19761e-05	0.952228
24h Distance Traveled	24h-BL Distance Traveled FC	0.387773	2.00582e-15
24h Distance Traveled	24h-BL Average Speed FC	0.388075	1.94228e-15
24h Distance Traveled	24h-BL % Time Moving FC	0.0139922	0.183575
24h Distance Traveled	24h-BL Border-Center Transitions FC	0.320205	1.88232e-12
24h Distance Traveled	24h-BL Delta Laterality	0.0144856	0.172574
24h Distance Traveled	72h-BL Distance Traveled FC	0.000238746	0.886383
24h Distance Traveled	72h-BL Average Speed FC	0.000200944	0.89571
24h Distance Traveled	72h-BL % Time Moving FC	0.00826461	0.40798
24h Distance Traveled	72h-BL Border-Center Transitions FC	0.00751362	0.421959
24h Distance Traveled	72h-BL Delta Laterality	0.00283362	0.622318
24h Distance Traveled	72h-24h Distance Traveled FC	0.0307431	0.119789
24h Distance Traveled	72h-24h Average Speed FC	0.0303781	0.122044
24h Distance Traveled	72h-24h % Time Moving FC	0.121869	0.00836386
24h Distance Traveled	72h-24h Border-Center Transitions FC	0.114881	0.0106088
24h Distance Traveled	72h-24h Delta Laterality	0.00660625	0.448932
24h Distance Traveled	Baseline % Red Pixels	0.00230449	0.66072
24h Distance Traveled	Ischemia % Red Pixels	0.0103361	0.351628
24h Distance Traveled	Reperfusion % Red Pixels	0.00407596	0.559226
24h Distance Traveled	Endpoint % Red Pixels	0.0433974	0.0572237
24h Distance Traveled	Baseline % Yellow Pixels	0.00555655	0.495169
24h Distance Traveled	Ischemia % Yellow Pixels	0.000550647	0.830189
24h Distance Traveled	Reperfusion % Yellow Pixels	0.0016162	0.713238
24h Distance Traveled	Endpoint % Yellow Pixels	0.0466341	0.0485073
24h Distance Traveled	Baseline % Green Pixels	0.000182834	0.90166
24h Distance Traveled	Ischemia % Green Pixels	0.000822752	0.793196
24h Distance Traveled	Reperfusion % Green Pixels	0.00459737	0.53506
24h Distance Traveled	Endpoint % Green Pixels	0.0429208	0.0586385
24h Distance Traveled	Baseline % Cyan Pixels	0.00177165	0.70039
24h Distance Traveled	Ischemia % Cyan Pixels	0.0222167	0.170781
24h Distance Traveled	Reperfusion % Cyan Pixels	0.0066748	0.454572
24h Distance Traveled	Endpoint % Cyan Pixels	0.0135816	0.291102
24h Distance Traveled	Baseline % Blue Pixels	0.00038171	0.858293
24h Distance Traveled	Ischemia % Blue Pixels	0.0511916	0.0361931
24h Distance Traveled	Reperfusion % Blue Pixels	0.00547242	0.498461
24h Distance Traveled	Endpoint % Blue Pixels	0.00460871	0.53949
24h Distance Traveled	Baseline Speckle Score	0.00111368	0.76034
24h Distance Traveled	Ischemia Speckle Score	0.0209705	0.183419
24h Distance Traveled	Reperfusion Speckle Score	0.00500798	0.517324
24h Distance Traveled	Endpoint Speckle Score	0.0335487	0.0953747
24h Distance Traveled	Baseline ROI Perfusion	0.0328731	0.100926
24h Distance Traveled	Ischemia ROI Perfusion	0.000533962	0.835732
24h Distance Traveled	Reperfusion ROI Perfusion	0.00842941	0.409084
24h Distance Traveled	Endpoint ROI Perfusion	0.0078232	0.426528
24h Distance Traveled	Reperfusion ROI % Baseline	0.0431069	0.0596437
24h Distance Traveled	24h PMN Count	0.394122	0.00922082
24h Distance Traveled	24h MG/MΦ Count	0.000268492	0.95969
24h Distance Traveled	72h PMN Count	0.0485282	0.225693
24h Distance Traveled	72h MG/MΦ Count	0.0268146	0.434131
24h Distance Traveled	24h MG/MΦ Volume	0.00537387	0.820883
24h Distance Traveled	24h MG/MΦ Sphericity	0.0346034	0.562691
24h Distance Traveled	24h MG/MΦ Distance to PMN	0.227641	0.137821
24h Distance Traveled	24h PMN Volume	0.528965	0.0112004
24h Distance Traveled	24h PMN Sphericity	0.0245514	0.645454
24h Distance Traveled	24h PMN Distance to Vessel	0.253471	0.137943
24h Distance Traveled	24h % Intravascular PMNs	0.282912	0.113542
24h Distance Traveled	72h MG/MΦ Volume	0.044561	0.300593
24h Distance Traveled	72h MG/MΦ Sphericity	0.0279112	0.414651
24h Distance Traveled	72h MG/MΦ Distance to PMN	0.143544	0.0618041
24h Distance Traveled	72h PMN Volume	0.105958	0.112326
24h Distance Traveled	72h PMN Sphericity	0.022005	0.479155
24h Distance Traveled	72h PMN Distance to Vessel	0.246647	0.0220119
24h Distance Traveled	72h % Intravascular PMNs	0.247124	0.021864
24h Average Speed	24h Average Speed	1	0
24h Average Speed	24h % Time Moving	0.897339	1.27243e-65
24h Average Speed	24h Border-Center Transitions	0.692796	7.29574e-35
24h Average Speed	24h Laterality	0.0297633	0.0505749
24h Average Speed	72h Distance Traveled	0.167564	7.49233e-05
24h Average Speed	72h Average Speed	0.167986	7.32232e-05
24h Average Speed	72h % Time Moving	0.165903	8.19924e-05
24h Average Speed	72h Border-Center Transitions	0.0710666	0.0120517
24h Average Speed	72h Laterality	1.89519e-05	0.96789
24h Average Speed	24h-BL Distance Traveled FC	0.387283	2.11323e-15
24h Average Speed	24h-BL Average Speed FC	0.38797	1.96402e-15
24h Average Speed	24h-BL % Time Moving FC	0.0139332	0.184508
24h Average Speed	24h-BL Border-Center Transitions FC	0.31977	1.96291e-12
24h Average Speed	24h-BL Delta Laterality	0.0152483	0.161603
24h Average Speed	72h-BL Distance Traveled FC	0.000277358	0.877605
24h Average Speed	72h-BL Average Speed FC	0.000236394	0.88694
24h Average Speed	72h-BL % Time Moving FC	0.00835942	0.405293
24h Average Speed	72h-BL Border-Center Transitions FC	0.00781027	0.412907
24h Average Speed	72h-BL Delta Laterality	0.00305406	0.609073
24h Average Speed	72h-24h Distance Traveled FC	0.0309125	0.118758
24h Average Speed	72h-24h Average Speed FC	0.0305459	0.121002
24h Average Speed	72h-24h % Time Moving FC	0.123024	0.00804126
24h Average Speed	72h-24h Border-Center Transitions FC	0.116415	0.0100697
24h Average Speed	72h-24h Delta Laterality	0.00713209	0.431364
24h Average Speed	Baseline % Red Pixels	0.00257	0.642973
24h Average Speed	Ischemia % Red Pixels	0.0103213	0.351975
24h Average Speed	Reperfusion % Red Pixels	0.00454792	0.537269
24h Average Speed	Endpoint % Red Pixels	0.0436989	0.0563469
24h Average Speed	Baseline % Yellow Pixels	0.00606978	0.47584
24h Average Speed	Ischemia % Yellow Pixels	0.000538841	0.831993
24h Average Speed	Reperfusion % Yellow Pixels	0.00192863	0.688055
24h Average Speed	Endpoint % Yellow Pixels	0.0466004	0.0485905
24h Average Speed	Baseline % Green Pixels	0.000272752	0.880035
24h Average Speed	Ischemia % Green Pixels	0.000937724	0.779562
24h Average Speed	Reperfusion % Green Pixels	0.00505046	0.515548
24h Average Speed	Endpoint % Green Pixels	0.0433304	0.0574205
24h Average Speed	Baseline % Cyan Pixels	0.00185664	0.693637
24h Average Speed	Ischemia % Cyan Pixels	0.022556	0.167514
24h Average Speed	Reperfusion % Cyan Pixels	0.00704397	0.442316
24h Average Speed	Endpoint % Cyan Pixels	0.0137547	0.288027
24h Average Speed	Baseline % Blue Pixels	0.00040707	0.853711
24h Average Speed	Ischemia % Blue Pixels	0.0521028	0.034531
24h Average Speed	Reperfusion % Blue Pixels	0.00576419	0.487196
24h Average Speed	Endpoint % Blue Pixels	0.00469928	0.535522
24h Average Speed	Baseline Speckle Score	0.00123788	0.747753
24h Average Speed	Ischemia Speckle Score	0.0211276	0.181768
24h Average Speed	Reperfusion Speckle Score	0.00550245	0.497282
24h Average Speed	Endpoint Speckle Score	0.0338538	0.0938553
24h Average Speed	Baseline ROI Perfusion	0.0329052	0.100756
24h Average Speed	Ischemia ROI Perfusion	0.000455106	0.848189
24h Average Speed	Reperfusion ROI Perfusion	0.00898646	0.393956
24h Average Speed	Endpoint ROI Perfusion	0.00795697	0.422586
24h Average Speed	Reperfusion ROI % Baseline	0.0427773	0.0606493
24h Average Speed	24h PMN Count	0.394104	0.00922284
24h Average Speed	24h MG/MΦ Count	0.000267898	0.959735
24h Average Speed	72h PMN Count	0.0524416	0.207409
24h Average Speed	72h MG/MΦ Count	0.0327404	0.386723
24h Average Speed	24h MG/MΦ Volume	0.00537199	0.820914
24h Average Speed	24h MG/MΦ Sphericity	0.0345971	0.562727
24h Average Speed	24h MG/MΦ Distance to PMN	0.22764	0.137821
24h Average Speed	24h PMN Volume	0.528995	0.011197
24h Average Speed	24h PMN Sphericity	0.024551	0.645456
24h Average Speed	24h PMN Distance to Vessel	0.253486	0.13793
24h Average Speed	24h % Intravascular PMNs	0.282941	0.11352
24h Average Speed	72h MG/MΦ Volume	0.0481909	0.281249
24h Average Speed	72h MG/MΦ Sphericity	0.0274449	0.418633
24h Average Speed	72h MG/MΦ Distance to PMN	0.143548	0.0618005
24h Average Speed	72h PMN Volume	0.105957	0.112327
24h Average Speed	72h PMN Sphericity	0.0220076	0.479129
24h Average Speed	72h PMN Distance to Vessel	0.246651	0.0220107
24h Average Speed	72h % Intravascular PMNs	0.24713	0.0218622
24h % Time Moving	24h % Time Moving	1	0
24h % Time Moving	24h Border-Center Transitions	0.600829	1.6943e-27
24h % Time Moving	24h Laterality	0.0158402	0.155254
24h % Time Moving	72h Distance Traveled	0.153213	0.000162582
24h % Time Moving	72h Average Speed	0.153495	0.000160142
24h % Time Moving	72h % Time Moving	0.154107	0.000154963
24h % Time Moving	72h Border-Center Transitions	0.0521251	0.0323991
24h % Time Moving	72h Laterality	0.0034203	0.588341
24h % Time Moving	24h-BL Distance Traveled FC	0.29712	1.68139e-11
24h % Time Moving	24h-BL Average Speed FC	0.296711	1.74678e-11
24h % Time Moving	24h-BL % Time Moving FC	0.0083175	0.305917
24h % Time Moving	24h-BL Border-Center Transitions FC	0.250796	1.11804e-09
24h % Time Moving	24h-BL Delta Laterality	0.0113277	0.22812
24h % Time Moving	72h-BL Distance Traveled FC	0.00159151	0.712104
24h % Time Moving	72h-BL Average Speed FC	0.00151492	0.71882
24h % Time Moving	72h-BL % Time Moving FC	0.00671886	0.4558
24h % Time Moving	72h-BL Border-Center Transitions FC	0.00777915	0.413843
24h % Time Moving	72h-BL Delta Laterality	0.00103964	0.765532
24h % Time Moving	72h-24h Distance Traveled FC	0.0173866	0.24365
24h % Time Moving	72h-24h Average Speed FC	0.0171801	0.246493
24h % Time Moving	72h-24h % Time Moving FC	0.08136	0.0331008
24h % Time Moving	72h-24h Border-Center Transitions FC	0.0779458	0.0371819
24h % Time Moving	72h-24h Delta Laterality	0.00613439	0.465654
24h % Time Moving	Baseline % Red Pixels	0.00230897	0.66041
24h % Time Moving	Ischemia % Red Pixels	0.00948235	0.37242
24h % Time Moving	Reperfusion % Red Pixels	0.00862901	0.394944
24h % Time Moving	Endpoint % Red Pixels	0.0353697	0.086681
24h % Time Moving	Baseline % Yellow Pixels	0.0047536	0.528186
24h % Time Moving	Ischemia % Yellow Pixels	0.00154622	0.719251
24h % Time Moving	Reperfusion % Yellow Pixels	0.004599	0.534987
24h % Time Moving	Endpoint % Yellow Pixels	0.0377344	0.0766285
24h % Time Moving	Baseline % Green Pixels	0.000149687	0.910979
24h % Time Moving	Ischemia % Green Pixels	0.000931119	0.78032
24h % Time Moving	Reperfusion % Green Pixels	0.00869244	0.393205
24h % Time Moving	Endpoint % Green Pixels	0.0348313	0.0891599
24h % Time Moving	Baseline % Cyan Pixels	0.00137844	0.73432
24h % Time Moving	Ischemia % Cyan Pixels	0.0233239	0.160376
24h % Time Moving	Reperfusion % Cyan Pixels	0.0117506	0.320475
24h % Time Moving	Endpoint % Cyan Pixels	0.0112335	0.337283
24h % Time Moving	Baseline % Blue Pixels	0.000773917	0.799294
24h % Time Moving	Ischemia % Blue Pixels	0.0502763	0.0379454
24h % Time Moving	Reperfusion % Blue Pixels	0.0111452	0.333341
24h % Time Moving	Endpoint % Blue Pixels	0.0040798	0.563786
24h % Time Moving	Baseline Speckle Score	0.00135662	0.736355
24h % Time Moving	Ischemia Speckle Score	0.0204367	0.189154
24h % Time Moving	Reperfusion Speckle Score	0.010049	0.358438
24h % Time Moving	Endpoint Speckle Score	0.0274988	0.131677
24h % Time Moving	Baseline ROI Perfusion	0.03769	0.0786383
24h % Time Moving	Ischemia ROI Perfusion	0.000594668	0.826784
24h % Time Moving	Reperfusion ROI Perfusion	0.00286506	0.630803
24h % Time Moving	Endpoint ROI Perfusion	0.00576049	0.495264
24h % Time Moving	Reperfusion ROI % Baseline	0.0236691	0.164941
24h % Time Moving	24h PMN Count	0.406561	0.00787944
24h % Time Moving	24h MG/MΦ Count	0.00148582	0.905327
24h % Time Moving	72h PMN Count	0.000718005	0.884258
24h % Time Moving	72h MG/MΦ Count	0.00474049	0.743653
24h % Time Moving	24h MG/MΦ Volume	0.00249442	0.877498
24h % Time Moving	24h MG/MΦ Sphericity	0.0444253	0.510822
24h % Time Moving	24h MG/MΦ Distance to PMN	0.237734	0.128179
24h % Time Moving	24h PMN Volume	0.545068	0.009472
24h % Time Moving	24h PMN Sphericity	0.0227011	0.658345
24h % Time Moving	24h PMN Distance to Vessel	0.223567	0.167558
24h % Time Moving	24h % Intravascular PMNs	0.26417	0.128576
24h % Time Moving	72h MG/MΦ Volume	0.0296	0.400675
24h % Time Moving	72h MG/MΦ Sphericity	0.0596787	0.229086
24h % Time Moving	72h MG/MΦ Distance to PMN	0.0287838	0.417502
24h % Time Moving	72h PMN Volume	0.0477357	0.294067
24h % Time Moving	72h PMN Sphericity	0.00440463	0.752613
24h % Time Moving	72h PMN Distance to Vessel	0.124418	0.116803
24h % Time Moving	72h % Intravascular PMNs	0.106997	0.147796
24h Border-Center Transitions	24h Border-Center Transitions	1	0
24h Border-Center Transitions	24h Laterality	0.0546201	0.00768481
24h Border-Center Transitions	72h Distance Traveled	0.121437	0.000877171
24h Border-Center Transitions	72h Average Speed	0.121753	0.000862764
24h Border-Center Transitions	72h % Time Moving	0.114626	0.00125333
24h Border-Center Transitions	72h Border-Center Transitions	0.103029	0.00229506
24h Border-Center Transitions	72h Laterality	0.00672447	0.447532
24h Border-Center Transitions	24h-BL Distance Traveled FC	0.558475	1.17315e-24
24h Border-Center Transitions	24h-BL Average Speed FC	0.55886	1.10855e-24
24h Border-Center Transitions	24h-BL % Time Moving FC	0.0515312	0.00997186
24h Border-Center Transitions	24h-BL Border-Center Transitions FC	0.661651	3.78312e-32
24h Border-Center Transitions	24h-BL Delta Laterality	0.0353111	0.0322781
24h Border-Center Transitions	72h-BL Distance Traveled FC	0.00298357	0.613242
24h Border-Center Transitions	72h-BL Average Speed FC	0.00310759	0.605948
24h Border-Center Transitions	72h-BL % Time Moving FC	0.00394914	0.567754
24h Border-Center Transitions	72h-BL Border-Center Transitions FC	9.7624e-05	0.927203
24h Border-Center Transitions	72h-BL Delta Laterality	0.021547	0.172342
24h Border-Center Transitions	72h-24h Distance Traveled FC	0.0228824	0.180434
24h Border-Center Transitions	72h-24h Average Speed FC	0.0226104	0.183075
24h Border-Center Transitions	72h-24h % Time Moving FC	0.0868929	0.0274255
24h Border-Center Transitions	72h-24h Border-Center Transitions FC	0.107803	0.0134916
24h Border-Center Transitions	72h-24h Delta Laterality	0.00194947	0.681183
24h Border-Center Transitions	Baseline % Red Pixels	0.00116326	0.755227
24h Border-Center Transitions	Ischemia % Red Pixels	0.00784945	0.417257
24h Border-Center Transitions	Reperfusion % Red Pixels	0.000151603	0.910414
24h Border-Center Transitions	Endpoint % Red Pixels	0.00655104	0.464229
24h Border-Center Transitions	Baseline % Yellow Pixels	0.0110493	0.335443
24h Border-Center Transitions	Ischemia % Yellow Pixels	0.00564357	0.491802
24h Border-Center Transitions	Reperfusion % Yellow Pixels	0.00206403	0.677875
24h Border-Center Transitions	Endpoint % Yellow Pixels	0.0147302	0.271437
24h Border-Center Transitions	Baseline % Green Pixels	0.001523	0.72128
24h Border-Center Transitions	Ischemia % Green Pixels	0.000949752	0.778189
24h Border-Center Transitions	Reperfusion % Green Pixels	1.09526e-06	0.99237
24h Border-Center Transitions	Endpoint % Green Pixels	0.00517691	0.515432
24h Border-Center Transitions	Baseline % Cyan Pixels	0.0013436	0.737576
24h Border-Center Transitions	Ischemia % Cyan Pixels	0.00746762	0.428863
24h Border-Center Transitions	Reperfusion % Cyan Pixels	0.00332121	0.598155
24h Border-Center Transitions	Endpoint % Cyan Pixels	0.000639555	0.819378
24h Border-Center Transitions	Baseline % Blue Pixels	9.29068e-05	0.929813
24h Border-Center Transitions	Ischemia % Blue Pixels	0.0335905	0.0911982
24h Border-Center Transitions	Reperfusion % Blue Pixels	0.0027103	0.63404
24h Border-Center Transitions	Endpoint % Blue Pixels	1.22868e-05	0.974755
24h Border-Center Transitions	Baseline Speckle Score	0.000117139	0.921215
24h Border-Center Transitions	Ischemia Speckle Score	0.0122087	0.311164
24h Border-Center Transitions	Reperfusion Speckle Score	5.14646e-06	0.983461
24h Border-Center Transitions	Endpoint Speckle Score	0.00368293	0.583432
24h Border-Center Transitions	Baseline ROI Perfusion	0.0012579	0.750243
24h Border-Center Transitions	Ischemia ROI Perfusion	0.0199371	0.202924
24h Border-Center Transitions	Reperfusion ROI Perfusion	0.0322955	0.104021
24h Border-Center Transitions	Endpoint ROI Perfusion	0.0666436	0.0184571
24h Border-Center Transitions	Reperfusion ROI % Baseline	0.0687103	0.0166708
24h Border-Center Transitions	24h PMN Count	0.14261	0.149285
24h Border-Center Transitions	24h MG/MΦ Count	0.0366402	0.551204
24h Border-Center Transitions	72h PMN Count	0.146515	0.030599
24h Border-Center Transitions	72h MG/MΦ Count	0.0506864	0.279245
24h Border-Center Transitions	24h MG/MΦ Volume	0.180485	0.168622
24h Border-Center Transitions	24h MG/MΦ Sphericity	0.0429012	0.51833
24h Border-Center Transitions	24h MG/MΦ Distance to PMN	0.098778	0.346565
24h Border-Center Transitions	24h PMN Volume	0.00337274	0.865319
24h Border-Center Transitions	24h PMN Sphericity	0.00200286	0.896048
24h Border-Center Transitions	24h PMN Distance to Vessel	0.000233246	0.966599
24h Border-Center Transitions	24h % Intravascular PMNs	0.0616962	0.488953
24h Border-Center Transitions	72h MG/MΦ Volume	0.0139366	0.565721
24h Border-Center Transitions	72h MG/MΦ Sphericity	0.00788259	0.66625
24h Border-Center Transitions	72h MG/MΦ Distance to PMN	0.253652	0.0102678
24h Border-Center Transitions	72h PMN Volume	0.0831395	0.162179
24h Border-Center Transitions	72h PMN Sphericity	0.0366577	0.359236
24h Border-Center Transitions	72h PMN Distance to Vessel	0.2682	0.0161843
24h Border-Center Transitions	72h % Intravascular PMNs	0.23212	0.0269981
24h Laterality	24h Laterality	1	0
24h Laterality	72h Distance Traveled	0.0111698	0.327083
24h Laterality	72h Average Speed	0.0113824	0.322496
24h Laterality	72h % Time Moving	0.0173956	0.220602
24h Laterality	72h Border-Center Transitions	0.00589338	0.477144
24h Laterality	72h Laterality	0.0886107	0.00485246
24h Laterality	24h-BL Distance Traveled FC	0.102565	0.000215635
24h Laterality	24h-BL Average Speed FC	0.104361	0.000188417
24h Laterality	24h-BL % Time Moving FC	0.0593275	0.00598936
24h Laterality	24h-BL Border-Center Transitions FC	0.0863087	0.000727111
24h Laterality	24h-BL Delta Laterality	0.640303	9.32964e-30
24h Laterality	72h-BL Distance Traveled FC	0.0114861	0.320288
24h Laterality	72h-BL Average Speed FC	0.0118997	0.311679
24h Laterality	72h-BL % Time Moving FC	0.00533465	0.506498
24h Laterality	72h-BL Border-Center Transitions FC	0.010615	0.339464
24h Laterality	72h-BL Delta Laterality	0.0482603	0.0397313
24h Laterality	72h-24h Distance Traveled FC	0.0388507	0.0796951
24h Laterality	72h-24h Average Speed FC	0.0382694	0.0820282
24h Laterality	72h-24h % Time Moving FC	0.0377361	0.151398
24h Laterality	72h-24h Border-Center Transitions FC	0.0178949	0.325654
24h Laterality	72h-24h Delta Laterality	0.369018	2.75533e-10
24h Laterality	Baseline % Red Pixels	8.82729e-05	0.931991
24h Laterality	Ischemia % Red Pixels	0.0583255	0.0259682
24h Laterality	Reperfusion % Red Pixels	0.0474586	0.045192
24h Laterality	Endpoint % Red Pixels	0.0132927	0.299309
24h Laterality	Baseline % Yellow Pixels	0.0250277	0.148156
24h Laterality	Ischemia % Yellow Pixels	0.000995564	0.774369
24h Laterality	Reperfusion % Yellow Pixels	0.0191994	0.205989
24h Laterality	Endpoint % Yellow Pixels	0.00697164	0.452976
24h Laterality	Baseline % Green Pixels	0.00659408	0.460029
24h Laterality	Ischemia % Green Pixels	0.047521	0.0450473
24h Laterality	Reperfusion % Green Pixels	0.0570756	0.0276671
24h Laterality	Endpoint % Green Pixels	0.016198	0.251554
24h Laterality	Baseline % Cyan Pixels	0.00202299	0.68273
24h Laterality	Ischemia % Cyan Pixels	0.0418842	0.0602665
24h Laterality	Reperfusion % Cyan Pixels	0.0525786	0.0347761
24h Laterality	Endpoint % Cyan Pixels	0.00216398	0.676237
24h Laterality	Baseline % Blue Pixels	0.0384422	0.0721166
24h Laterality	Ischemia % Blue Pixels	0.0267983	0.134386
24h Laterality	Reperfusion % Blue Pixels	0.0615427	0.022067
24h Laterality	Endpoint % Blue Pixels	0.00771002	0.429906
24h Laterality	Baseline Speckle Score	0.00709214	0.443504
24h Laterality	Ischemia Speckle Score	0.0554386	0.030065
24h Laterality	Reperfusion Speckle Score	0.0574173	0.0271918
24h Laterality	Endpoint Speckle Score	0.0124872	0.314526
24h Laterality	Baseline ROI Perfusion	0.00564562	0.502283
24h Laterality	Ischemia ROI Perfusion	0.0181606	0.227395
24h Laterality	Reperfusion ROI Perfusion	0.0335798	0.0993747
24h Laterality	Endpoint ROI Perfusion	0.00941637	0.385791
24h Laterality	Reperfusion ROI % Baseline	0.0313787	0.11137
24h Laterality	24h PMN Count	0.213582	0.0715015
24h Laterality	24h MG/MΦ Count	0.0650752	0.423597
24h Laterality	72h PMN Count	0.0454207	0.241541
24h Laterality	72h MG/MΦ Count	0.00013934	0.955341
24h Laterality	24h MG/MΦ Volume	0.125905	0.257735
24h Laterality	24h MG/MΦ Sphericity	0.0740968	0.392037
24h Laterality	24h MG/MΦ Distance to PMN	0.00242378	0.885701
24h Laterality	24h PMN Volume	0.0600712	0.467597
24h Laterality	24h PMN Sphericity	8.6736e-05	0.978319
24h Laterality	24h PMN Distance to Vessel	0.00055641	0.948429
24h Laterality	24h % Intravascular PMNs	0.0780801	0.434283
24h Laterality	72h MG/MΦ Volume	0.00214604	0.822199
24h Laterality	72h MG/MΦ Sphericity	0.00560788	0.716175
24h Laterality	72h MG/MΦ Distance to PMN	0.00114814	0.872256
24h Laterality	72h PMN Volume	0.000119661	0.958611
24h Laterality	72h PMN Sphericity	0.0515785	0.274941
24h Laterality	72h PMN Distance to Vessel	0.0284702	0.464691
24h Laterality	72h % Intravascular PMNs	0.0246434	0.49678
72h Distance Traveled	72h Distance Traveled	1	0
72h Distance Traveled	72h Average Speed	0.99995	1.42969e-197
72h Distance Traveled	72h % Time Moving	0.899093	4.18924e-47
72h Distance Traveled	72h Border-Center Transitions	0.692776	4.7653e-25
72h Distance Traveled	72h Laterality	0.000184616	0.897714
72h Distance Traveled	24h-BL Distance Traveled FC	0.0324647	0.0929876
72h Distance Traveled	24h-BL Average Speed FC	0.0321871	0.0944202
72h Distance Traveled	24h-BL % Time Moving FC	0.0098205	0.366877
72h Distance Traveled	24h-BL Border-Center Transitions FC	0.0179183	0.213735
72h Distance Traveled	24h-BL Delta Laterality	0.00608942	0.469884
72h Distance Traveled	72h-BL Distance Traveled FC	0.136787	0.000263556
72h Distance Traveled	72h-BL Average Speed FC	0.137419	0.000254402
72h Distance Traveled	72h-BL % Time Moving FC	0.000410969	0.849582
72h Distance Traveled	72h-BL Border-Center Transitions FC	0.112703	0.00100284
72h Distance Traveled	72h-BL Delta Laterality	0.000756647	0.793528
72h Distance Traveled	72h-24h Distance Traveled FC	0.00252003	0.658334
72h Distance Traveled	72h-24h Average Speed FC	0.00244911	0.662881
72h Distance Traveled	72h-24h % Time Moving FC	0.0159617	0.35349
72h Distance Traveled	72h-24h Border-Center Transitions FC	0.0281963	0.21607
72h Distance Traveled	72h-24h Delta Laterality	0.00633044	0.461199
72h Distance Traveled	Baseline % Red Pixels	0.0072633	0.540051
72h Distance Traveled	Ischemia % Red Pixels	0.0107916	0.454736
72h Distance Traveled	Reperfusion % Red Pixels	0.00140488	0.787865
72h Distance Traveled	Endpoint % Red Pixels	0.00865981	0.503312
72h Distance Traveled	Baseline % Yellow Pixels	0.0381159	0.157142
72h Distance Traveled	Ischemia % Yellow Pixels	0.0140411	0.39344
72h Distance Traveled	Reperfusion % Yellow Pixels	0.00195347	0.750983
72h Distance Traveled	Endpoint % Yellow Pixels	0.0014516	0.78445
72h Distance Traveled	Baseline % Green Pixels	0.00268765	0.70967
72h Distance Traveled	Ischemia % Green Pixels	0.00504639	0.609735
72h Distance Traveled	Reperfusion % Green Pixels	0.00564665	0.58917
72h Distance Traveled	Endpoint % Green Pixels	0.00700434	0.547391
72h Distance Traveled	Baseline % Cyan Pixels	0.000485278	0.874369
72h Distance Traveled	Ischemia % Cyan Pixels	0.00373647	0.660598
72h Distance Traveled	Reperfusion % Cyan Pixels	0.0138018	0.39753
72h Distance Traveled	Endpoint % Cyan Pixels	0.0232408	0.271112
72h Distance Traveled	Baseline % Blue Pixels	2.8671e-05	0.969347
72h Distance Traveled	Ischemia % Blue Pixels	0.000758449	0.843297
72h Distance Traveled	Reperfusion % Blue Pixels	0.00618709	0.571823
72h Distance Traveled	Endpoint % Blue Pixels	0.0350175	0.175435
72h Distance Traveled	Baseline Speckle Score	0.00122377	0.801715
72h Distance Traveled	Ischemia Speckle Score	0.00558479	0.591223
72h Distance Traveled	Reperfusion Speckle Score	0.00375078	0.659988
72h Distance Traveled	Endpoint Speckle Score	0.0131807	0.408432
72h Distance Traveled	Baseline ROI Perfusion	0.0043462	0.635761
72h Distance Traveled	Ischemia ROI Perfusion	0.000582521	0.862467
72h Distance Traveled	Reperfusion ROI Perfusion	0.0149783	0.37798
72h Distance Traveled	Endpoint ROI Perfusion	1.85535e-05	0.97534
72h Distance Traveled	Reperfusion ROI % Baseline	0.000806303	0.838493
72h Distance Traveled	24h PMN Count	NA	NA
72h Distance Traveled	24h MG/MΦ Count	NA	NA
72h Distance Traveled	72h PMN Count	0.0390288	0.262739
72h Distance Traveled	72h MG/MΦ Count	0.00163109	0.841475
72h Distance Traveled	24h MG/MΦ Volume	NA	NA
72h Distance Traveled	24h MG/MΦ Sphericity	NA	NA
72h Distance Traveled	24h MG/MΦ Distance to PMN	NA	NA
72h Distance Traveled	24h PMN Volume	NA	NA
72h Distance Traveled	24h PMN Sphericity	NA	NA
72h Distance Traveled	24h PMN Distance to Vessel	NA	NA
72h Distance Traveled	24h % Intravascular PMNs	NA	NA
72h Distance Traveled	72h MG/MΦ Volume	0.0433208	0.287856
72h Distance Traveled	72h MG/MΦ Sphericity	0.018526	0.489807
72h Distance Traveled	72h MG/MΦ Distance to PMN	0.017984	0.504851
72h Distance Traveled	72h PMN Volume	0.0310601	0.379215
72h Distance Traveled	72h PMN Sphericity	0.134639	0.059743
72h Distance Traveled	72h PMN Distance to Vessel	0.00256582	0.818459
72h Distance Traveled	72h % Intravascular PMNs	0.0211424	0.507985
72h Average Speed	72h Average Speed	1	0
72h Average Speed	72h % Time Moving	0.899397	3.65202e-47
72h Average Speed	72h Border-Center Transitions	0.692581	4.90557e-25
72h Average Speed	72h Laterality	0.000185329	0.897518
72h Average Speed	24h-BL Distance Traveled FC	0.0326722	0.0919314
72h Average Speed	24h-BL Average Speed FC	0.0323945	0.0933474
72h Average Speed	24h-BL % Time Moving FC	0.00989169	0.365137
72h Average Speed	24h-BL Border-Center Transitions FC	0.0180291	0.212312
72h Average Speed	24h-BL Delta Laterality	0.00610465	0.469328
72h Average Speed	72h-BL Distance Traveled FC	0.136574	0.000266723
72h Average Speed	72h-BL Average Speed FC	0.137274	0.000256474
72h Average Speed	72h-BL % Time Moving FC	0.000414798	0.848891
72h Average Speed	72h-BL Border-Center Transitions FC	0.112507	0.00101374
72h Average Speed	72h-BL Delta Laterality	0.000790081	0.78912
72h Average Speed	72h-24h Distance Traveled FC	0.0025588	0.655881
72h Average Speed	72h-24h Average Speed FC	0.00247955	0.66092
72h Average Speed	72h-24h % Time Moving FC	0.0159632	0.353468
72h Average Speed	72h-24h Border-Center Transitions FC	0.0281968	0.216067
72h Average Speed	72h-24h Delta Laterality	0.00646629	0.456414
72h Average Speed	Baseline % Red Pixels	0.00726411	0.540028
72h Average Speed	Ischemia % Red Pixels	0.0107936	0.454695
72h Average Speed	Reperfusion % Red Pixels	0.00140429	0.787909
72h Average Speed	Endpoint % Red Pixels	0.00866125	0.503276
72h Average Speed	Baseline % Yellow Pixels	0.0381182	0.15713
72h Average Speed	Ischemia % Yellow Pixels	0.0140434	0.3934
72h Average Speed	Reperfusion % Yellow Pixels	0.00195451	0.750919
72h Average Speed	Endpoint % Yellow Pixels	0.00145229	0.784401
72h Average Speed	Baseline % Green Pixels	0.00268783	0.70966
72h Average Speed	Ischemia % Green Pixels	0.00504793	0.609681
72h Average Speed	Reperfusion % Green Pixels	0.00564589	0.589196
72h Average Speed	Endpoint % Green Pixels	0.00700557	0.547356
72h Average Speed	Baseline % Cyan Pixels	0.000485204	0.874379
72h Average Speed	Ischemia % Cyan Pixels	0.0037366	0.660592
72h Average Speed	Reperfusion % Cyan Pixels	0.0138012	0.397541
72h Average Speed	Endpoint % Cyan Pixels	0.0232415	0.271105
72h Average Speed	Baseline % Blue Pixels	2.87141e-05	0.969324
72h Average Speed	Ischemia % Blue Pixels	0.00075843	0.843299
72h Average Speed	Reperfusion % Blue Pixels	0.00618643	0.571844
72h Average Speed	Endpoint % Blue Pixels	0.0350187	0.175428
72h Average Speed	Baseline Speckle Score	0.00122405	0.801692
72h Average Speed	Ischemia Speckle Score	0.00558563	0.591196
72h Average Speed	Reperfusion Speckle Score	0.00374998	0.660022
72h Average Speed	Endpoint Speckle Score	0.0131823	0.408404
72h Average Speed	Baseline ROI Perfusion	0.00434518	0.635801
72h Average Speed	Ischemia ROI Perfusion	0.000582797	0.862435
72h Average Speed	Reperfusion ROI Perfusion	0.0149791	0.377966
72h Average Speed	Endpoint ROI Perfusion	1.85281e-05	0.975357
72h Average Speed	Reperfusion ROI % Baseline	0.000806176	0.838505
72h Average Speed	24h PMN Count	NA	NA
72h Average Speed	24h MG/MΦ Count	NA	NA
72h Average Speed	72h PMN Count	0.0390295	0.262735
72h Average Speed	72h MG/MΦ Count	0.00163109	0.841475
72h Average Speed	24h MG/MΦ Volume	NA	NA
72h Average Speed	24h MG/MΦ Sphericity	NA	NA
72h Average Speed	24h MG/MΦ Distance to PMN	NA	NA
72h Average Speed	24h PMN Volume	NA	NA
72h Average Speed	24h PMN Sphericity	NA	NA
72h Average Speed	24h PMN Distance to Vessel	NA	NA
72h Average Speed	24h % Intravascular PMNs	NA	NA
72h Average Speed	72h MG/MΦ Volume	0.0433251	0.287832
72h Average Speed	72h MG/MΦ Sphericity	0.0185258	0.48981
72h Average Speed	72h MG/MΦ Distance to PMN	0.017987	0.504815
72h Average Speed	72h PMN Volume	0.0310663	0.379167
72h Average Speed	72h PMN Sphericity	0.134639	0.0597427
72h Average Speed	72h PMN Distance to Vessel	0.00256574	0.818462
72h Average Speed	72h % Intravascular PMNs	0.0211453	0.507955
72h % Time Moving	72h % Time Moving	1	0
72h % Time Moving	72h Border-Center Transitions	0.702447	1.10435e-25
72h % Time Moving	72h Laterality	0.000413274	0.847473
72h % Time Moving	24h-BL Distance Traveled FC	0.0362964	0.0754088
72h % Time Moving	24h-BL Average Speed FC	0.0360787	0.0763068
72h % Time Moving	24h-BL % Time Moving FC	0.00584376	0.486826
72h % Time Moving	24h-BL Border-Center Transitions FC	0.0180182	0.212452
72h % Time Moving	24h-BL Delta Laterality	0.00661454	0.451281
72h % Time Moving	72h-BL Distance Traveled FC	0.165197	5.28711e-05
72h % Time Moving	72h-BL Average Speed FC	0.166149	5.00689e-05
72h % Time Moving	72h-BL % Time Moving FC	0.000371671	0.856874
72h % Time Moving	72h-BL Border-Center Transitions FC	0.115355	0.000866392
72h % Time Moving	72h-BL Delta Laterality	0.00192666	0.676113
72h % Time Moving	72h-24h Distance Traveled FC	0.00587614	0.499145
72h % Time Moving	72h-24h Average Speed FC	0.00573032	0.504533
72h % Time Moving	72h-24h % Time Moving FC	0.0371835	0.154485
72h % Time Moving	72h-24h Border-Center Transitions FC	0.0399637	0.139622
72h % Time Moving	72h-24h Delta Laterality	0.00899241	0.379492
72h % Time Moving	Baseline % Red Pixels	0.00642745	0.564426
72h % Time Moving	Ischemia % Red Pixels	0.00528529	0.601374
72h % Time Moving	Reperfusion % Red Pixels	0.00445253	0.631651
72h % Time Moving	Endpoint % Red Pixels	0.000865645	0.832737
72h % Time Moving	Baseline % Yellow Pixels	0.0479465	0.111656
72h % Time Moving	Ischemia % Yellow Pixels	0.00745565	0.534714
72h % Time Moving	Reperfusion % Yellow Pixels	0.000224372	0.91439
72h % Time Moving	Endpoint % Yellow Pixels	0.00056932	0.86402
72h % Time Moving	Baseline % Green Pixels	0.00348641	0.671483
72h % Time Moving	Ischemia % Green Pixels	0.000487104	0.874135
72h % Time Moving	Reperfusion % Green Pixels	0.00973076	0.477916
72h % Time Moving	Endpoint % Green Pixels	0.000272245	0.905735
72h % Time Moving	Baseline % Cyan Pixels	0.00110503	0.811394
72h % Time Moving	Ischemia % Cyan Pixels	0.00256821	0.715916
72h % Time Moving	Reperfusion % Cyan Pixels	0.0238418	0.26493
72h % Time Moving	Endpoint % Cyan Pixels	0.0163015	0.357546
72h % Time Moving	Baseline % Blue Pixels	0.000493952	0.873261
72h % Time Moving	Ischemia % Blue Pixels	0.00304758	0.691749
72h % Time Moving	Reperfusion % Blue Pixels	0.0127195	0.41681
72h % Time Moving	Endpoint % Blue Pixels	0.0275511	0.230318
72h % Time Moving	Baseline Speckle Score	0.00032358	0.897275
72h % Time Moving	Ischemia Speckle Score	0.00385229	0.655702
72h % Time Moving	Reperfusion Speckle Score	0.00830564	0.51221
72h % Time Moving	Endpoint Speckle Score	0.00323763	0.682777
72h % Time Moving	Baseline ROI Perfusion	0.00226192	0.732722
72h % Time Moving	Ischemia ROI Perfusion	0.00152021	0.77954
72h % Time Moving	Reperfusion ROI Perfusion	0.00501605	0.610815
72h % Time Moving	Endpoint ROI Perfusion	0.000973902	0.822746
72h % Time Moving	Reperfusion ROI % Baseline	0.00419621	0.641666
72h % Time Moving	24h PMN Count	NA	NA
72h % Time Moving	24h MG/MΦ Count	NA	NA
72h % Time Moving	72h PMN Count	0.0606007	0.160488
72h % Time Moving	72h MG/MΦ Count	0.0019022	0.828984
72h % Time Moving	24h MG/MΦ Volume	NA	NA
72h % Time Moving	24h MG/MΦ Sphericity	NA	NA
72h % Time Moving	24h MG/MΦ Distance to PMN	NA	NA
72h % Time Moving	24h PMN Volume	NA	NA
72h % Time Moving	24h PMN Sphericity	NA	NA
72h % Time Moving	24h PMN Distance to Vessel	NA	NA
72h % Time Moving	24h % Intravascular PMNs	NA	NA
72h % Time Moving	72h MG/MΦ Volume	0.0276576	0.397665
72h % Time Moving	72h MG/MΦ Sphericity	0.042655	0.291675
72h % Time Moving	72h MG/MΦ Distance to PMN	0.00199187	0.825059
72h % Time Moving	72h PMN Volume	0.0295951	0.390876
72h % Time Moving	72h PMN Sphericity	0.192871	0.0219133
72h % Time Moving	72h PMN Distance to Vessel	0.00795927	0.685619
72h % Time Moving	72h % Intravascular PMNs	0.016194	0.562843
72h Border-Center Transitions	72h Border-Center Transitions	1	0
72h Border-Center Transitions	72h Laterality	0.00136288	0.726808
72h Border-Center Transitions	24h-BL Distance Traveled FC	0.0405103	0.0600547
72h Border-Center Transitions	24h-BL Average Speed FC	0.0399441	0.0619114
72h Border-Center Transitions	24h-BL % Time Moving FC	0.0213643	0.181939
72h Border-Center Transitions	24h-BL Border-Center Transitions FC	0.0270278	0.125867
72h Border-Center Transitions	24h-BL Delta Laterality	0.005042	0.510916
72h Border-Center Transitions	72h-BL Distance Traveled FC	0.216535	2.60506e-06
72h Border-Center Transitions	72h-BL Average Speed FC	0.217057	2.52451e-06
72h Border-Center Transitions	72h-BL % Time Moving FC	0.0115507	0.313328
72h Border-Center Transitions	72h-BL Border-Center Transitions FC	0.292121	2.24335e-08
72h Border-Center Transitions	72h-BL Delta Laterality	0.0013295	0.728599
72h Border-Center Transitions	72h-24h Distance Traveled FC	0.00166874	0.719015
72h Border-Center Transitions	72h-24h Average Speed FC	0.00170938	0.715758
72h Border-Center Transitions	72h-24h % Time Moving FC	0.0348318	0.16843
72h Border-Center Transitions	72h-24h Border-Center Transitions FC	0.0876838	0.0266988
72h Border-Center Transitions	72h-24h Delta Laterality	0.0121126	0.307363
72h Border-Center Transitions	Baseline % Red Pixels	0.00136634	0.790729
72h Border-Center Transitions	Ischemia % Red Pixels	0.00399489	0.649795
72h Border-Center Transitions	Reperfusion % Red Pixels	0.000739528	0.845239
72h Border-Center Transitions	Endpoint % Red Pixels	0.00144078	0.785236
72h Border-Center Transitions	Baseline % Yellow Pixels	0.0552401	0.0871237
72h Border-Center Transitions	Ischemia % Yellow Pixels	0.00745472	0.53474
72h Border-Center Transitions	Reperfusion % Yellow Pixels	0.00267318	0.710418
72h Border-Center Transitions	Endpoint % Yellow Pixels	0.000177243	0.92388
72h Border-Center Transitions	Baseline % Green Pixels	0.000366151	0.890765
72h Border-Center Transitions	Ischemia % Green Pixels	0.014861	0.379868
72h Border-Center Transitions	Reperfusion % Green Pixels	0.00367781	0.663111
72h Border-Center Transitions	Endpoint % Green Pixels	0.000608607	0.859452
72h Border-Center Transitions	Baseline % Cyan Pixels	0.00996462	0.472647
72h Border-Center Transitions	Ischemia % Cyan Pixels	0.000551322	0.866167
72h Border-Center Transitions	Reperfusion % Cyan Pixels	0.012071	0.429021
72h Border-Center Transitions	Endpoint % Cyan Pixels	0.00878237	0.500293
72h Border-Center Transitions	Baseline % Blue Pixels	0.00743924	0.535166
72h Border-Center Transitions	Ischemia % Blue Pixels	0.000135987	0.933302
72h Border-Center Transitions	Reperfusion % Blue Pixels	0.00958203	0.481315
72h Border-Center Transitions	Endpoint % Blue Pixels	0.0117357	0.435542
72h Border-Center Transitions	Baseline Speckle Score	0.00157563	0.775661
72h Border-Center Transitions	Ischemia Speckle Score	0.00324284	0.682535
72h Border-Center Transitions	Reperfusion Speckle Score	0.00276088	0.705917
72h Border-Center Transitions	Endpoint Speckle Score	0.00269392	0.709346
72h Border-Center Transitions	Baseline ROI Perfusion	0.000255718	0.908629
72h Border-Center Transitions	Ischemia ROI Perfusion	0.000229529	0.913415
72h Border-Center Transitions	Reperfusion ROI Perfusion	0.00257205	0.715713
72h Border-Center Transitions	Endpoint ROI Perfusion	0.00792181	0.522163
72h Border-Center Transitions	Reperfusion ROI % Baseline	0.013538	0.402108
72h Border-Center Transitions	24h PMN Count	NA	NA
72h Border-Center Transitions	24h MG/MΦ Count	NA	NA
72h Border-Center Transitions	72h PMN Count	0.0103098	0.567734
72h Border-Center Transitions	72h MG/MΦ Count	0.0015434	0.845744
72h Border-Center Transitions	24h MG/MΦ Volume	NA	NA
72h Border-Center Transitions	24h MG/MΦ Sphericity	NA	NA
72h Border-Center Transitions	24h MG/MΦ Distance to PMN	NA	NA
72h Border-Center Transitions	24h PMN Volume	NA	NA
72h Border-Center Transitions	24h PMN Sphericity	NA	NA
72h Border-Center Transitions	24h PMN Distance to Vessel	NA	NA
72h Border-Center Transitions	24h % Intravascular PMNs	NA	NA
72h Border-Center Transitions	72h MG/MΦ Volume	0.0365404	0.329854
72h Border-Center Transitions	72h MG/MΦ Sphericity	0.0102595	0.60805
72h Border-Center Transitions	72h MG/MΦ Distance to PMN	0.0143889	0.5512
72h Border-Center Transitions	72h PMN Volume	0.00609267	0.698765
72h Border-Center Transitions	72h PMN Sphericity	0.0819036	0.147846
72h Border-Center Transitions	72h PMN Distance to Vessel	0.000503451	0.919059
72h Border-Center Transitions	72h % Intravascular PMNs	0.0220592	0.498827
72h Laterality	72h Laterality	1	0
72h Laterality	24h-BL Distance Traveled FC	0.0104911	0.342315
72h Laterality	24h-BL Average Speed FC	0.0108248	0.334711
72h Laterality	24h-BL % Time Moving FC	0.0137561	0.285065
72h Laterality	24h-BL Border-Center Transitions FC	0.00825397	0.39989
72h Laterality	24h-BL Delta Laterality	0.0794442	0.00780407
72h Laterality	72h-BL Distance Traveled FC	0.00331491	0.585654
72h Laterality	72h-BL Average Speed FC	0.00331022	0.58592
72h Laterality	72h-BL % Time Moving FC	0.107026	0.00175239
72h Laterality	72h-BL Border-Center Transitions FC	0.0220787	0.157482
72h Laterality	72h-BL Delta Laterality	0.607403	5.70809e-20
72h Laterality	72h-24h Distance Traveled FC	0.0510797	0.0438181
72h Laterality	72h-24h Average Speed FC	0.0510914	0.0437932
72h Laterality	72h-24h % Time Moving FC	0.0167703	0.341479
72h Laterality	72h-24h Border-Center Transitions FC	0.0154951	0.36068
72h Laterality	72h-24h Delta Laterality	0.324445	6.9746e-09
72h Laterality	Baseline % Red Pixels	0.000368333	0.891504
72h Laterality	Ischemia % Red Pixels	0.00184839	0.759855
72h Laterality	Reperfusion % Red Pixels	0.000819982	0.838714
72h Laterality	Endpoint % Red Pixels	0.0562341	0.0873211
72h Laterality	Baseline % Yellow Pixels	0.0151307	0.380221
72h Laterality	Ischemia % Yellow Pixels	0.0196192	0.317145
72h Laterality	Reperfusion % Yellow Pixels	0.00839241	0.514142
72h Laterality	Endpoint % Yellow Pixels	0.0947512	0.0249449
72h Laterality	Baseline % Green Pixels	0.000129604	0.935517
72h Laterality	Ischemia % Green Pixels	0.00296543	0.69855
72h Laterality	Reperfusion % Green Pixels	6.05176e-06	0.986052
72h Laterality	Endpoint % Green Pixels	0.0436118	0.133437
72h Laterality	Baseline % Cyan Pixels	0.000394958	0.887676
72h Laterality	Ischemia % Cyan Pixels	0.0161648	0.364292
72h Laterality	Reperfusion % Cyan Pixels	0.00545571	0.599148
72h Laterality	Endpoint % Cyan Pixels	0.0114241	0.446206
72h Laterality	Baseline % Blue Pixels	0.0027387	0.709775
72h Laterality	Ischemia % Blue Pixels	0.000271967	0.906698
72h Laterality	Reperfusion % Blue Pixels	0.00294941	0.699327
72h Laterality	Endpoint % Blue Pixels	0.00106461	0.816588
72h Laterality	Baseline Speckle Score	0.000498489	0.873916
72h Laterality	Ischemia Speckle Score	0.00369137	0.66562
72h Laterality	Reperfusion Speckle Score	2.58886e-05	0.971156
72h Laterality	Endpoint Speckle Score	0.0393921	0.15425
72h Laterality	Baseline ROI Perfusion	0.00445153	0.635019
72h Laterality	Ischemia ROI Perfusion	0.00156262	0.778687
72h Laterality	Reperfusion ROI Perfusion	0.0062774	0.572797
72h Laterality	Endpoint ROI Perfusion	0.034239	0.184687
72h Laterality	Reperfusion ROI % Baseline	0.00086456	0.834448
72h Laterality	24h PMN Count	NA	NA
72h Laterality	24h MG/MΦ Count	NA	NA
72h Laterality	72h PMN Count	0.0454518	0.233559
72h Laterality	72h MG/MΦ Count	0.0290198	0.405401
72h Laterality	24h MG/MΦ Volume	NA	NA
72h Laterality	24h MG/MΦ Sphericity	NA	NA
72h Laterality	24h MG/MΦ Distance to PMN	NA	NA
72h Laterality	24h PMN Volume	NA	NA
72h Laterality	24h PMN Sphericity	NA	NA
72h Laterality	24h PMN Distance to Vessel	NA	NA
72h Laterality	24h % Intravascular PMNs	NA	NA
72h Laterality	72h MG/MΦ Volume	0.00505547	0.724523
72h Laterality	72h MG/MΦ Sphericity	0.0235512	0.444728
72h Laterality	72h MG/MΦ Distance to PMN	0.00292451	0.793029
72h Laterality	72h PMN Volume	0.00485376	0.735225
72h Laterality	72h PMN Sphericity	6.18758e-05	0.969578
72h Laterality	72h PMN Distance to Vessel	0.163502	0.0619714
72h Laterality	72h % Intravascular PMNs	0.232301	0.0231185
24h-BL Distance Traveled FC	24h-BL Distance Traveled FC	1	0
24h-BL Distance Traveled FC	24h-BL Average Speed FC	0.999753	1.43116e-234
24h-BL Distance Traveled FC	24h-BL % Time Moving FC	0.435837	2.31972e-17
24h-BL Distance Traveled FC	24h-BL Border-Center Transitions FC	0.824968	1.16955e-50
24h-BL Distance Traveled FC	24h-BL Delta Laterality	0.0610492	0.00459648
24h-BL Distance Traveled FC	72h-BL Distance Traveled FC	0.054513	0.0285769
24h-BL Distance Traveled FC	72h-BL Average Speed FC	0.0550903	0.027724
24h-BL Distance Traveled FC	72h-BL % Time Moving FC	2.52063e-05	0.963627
24h-BL Distance Traveled FC	72h-BL Border-Center Transitions FC	0.0101033	0.351443
24h-BL Distance Traveled FC	72h-BL Delta Laterality	0.0316255	0.0973914
24h-BL Distance Traveled FC	72h-24h Distance Traveled FC	0.0270312	0.145023
24h-BL Distance Traveled FC	72h-24h Average Speed FC	0.0267102	0.147466
24h-BL Distance Traveled FC	72h-24h % Time Moving FC	0.0547847	0.0825185
24h-BL Distance Traveled FC	72h-24h Border-Center Transitions FC	0.0805331	0.0340455
24h-BL Distance Traveled FC	72h-24h Delta Laterality	0.00143068	0.724901
24h-BL Distance Traveled FC	Baseline % Red Pixels	0.0139283	0.279151
24h-BL Distance Traveled FC	Ischemia % Red Pixels	0.0198285	0.195943
24h-BL Distance Traveled FC	Reperfusion % Red Pixels	0.000608112	0.821688
24h-BL Distance Traveled FC	Endpoint % Red Pixels	0.0155942	0.257718
24h-BL Distance Traveled FC	Baseline % Yellow Pixels	0.0115347	0.324988
24h-BL Distance Traveled FC	Ischemia % Yellow Pixels	0.00359336	0.583512
24h-BL Distance Traveled FC	Reperfusion % Yellow Pixels	3.69559e-05	0.955699
24h-BL Distance Traveled FC	Endpoint % Yellow Pixels	0.0108268	0.346233
24h-BL Distance Traveled FC	Baseline % Green Pixels	0.00744402	0.429596
24h-BL Distance Traveled FC	Ischemia % Green Pixels	0.00602648	0.477423
24h-BL Distance Traveled FC	Reperfusion % Green Pixels	0.00123219	0.748314
24h-BL Distance Traveled FC	Endpoint % Green Pixels	0.0164522	0.244921
24h-BL Distance Traveled FC	Baseline % Cyan Pixels	0.0103125	0.35218
24h-BL Distance Traveled FC	Ischemia % Cyan Pixels	0.0205234	0.188209
24h-BL Distance Traveled FC	Reperfusion % Cyan Pixels	0.00183337	0.695468
24h-BL Distance Traveled FC	Endpoint % Cyan Pixels	0.00769303	0.427568
24h-BL Distance Traveled FC	Baseline % Blue Pixels	0.00826755	0.405069
24h-BL Distance Traveled FC	Ischemia % Blue Pixels	0.033294	0.0926635
24h-BL Distance Traveled FC	Reperfusion % Blue Pixels	1.38802e-05	0.972842
24h-BL Distance Traveled FC	Endpoint % Blue Pixels	0.00406011	0.56473
24h-BL Distance Traveled FC	Baseline Speckle Score	0.0118279	0.318879
24h-BL Distance Traveled FC	Ischemia Speckle Score	0.0268673	0.131545
24h-BL Distance Traveled FC	Reperfusion Speckle Score	0.000780619	0.798446
24h-BL Distance Traveled FC	Endpoint Speckle Score	0.0138128	0.287004
24h-BL Distance Traveled FC	Baseline ROI Perfusion	5.84428e-05	0.945314
24h-BL Distance Traveled FC	Ischemia ROI Perfusion	0.000327563	0.870991
24h-BL Distance Traveled FC	Reperfusion ROI Perfusion	0.02427	0.159612
24h-BL Distance Traveled FC	Endpoint ROI Perfusion	0.0383081	0.0761812
24h-BL Distance Traveled FC	Reperfusion ROI % Baseline	0.0220226	0.180599
24h-BL Distance Traveled FC	24h PMN Count	0.169487	0.113108
24h-BL Distance Traveled FC	24h MG/MΦ Count	0.0322302	0.576637
24h-BL Distance Traveled FC	72h PMN Count	0.156747	0.0248925
24h-BL Distance Traveled FC	72h MG/MΦ Count	0.0635761	0.224009
24h-BL Distance Traveled FC	24h MG/MΦ Volume	0.179059	0.170495
24h-BL Distance Traveled FC	24h MG/MΦ Sphericity	0.00103588	0.920904
24h-BL Distance Traveled FC	24h MG/MΦ Distance to PMN	0.150201	0.23893
24h-BL Distance Traveled FC	24h PMN Volume	0.00440289	0.846304
24h-BL Distance Traveled FC	24h PMN Sphericity	0.00458944	0.843116
24h-BL Distance Traveled FC	24h PMN Distance to Vessel	0.0375897	0.591472
24h-BL Distance Traveled FC	24h % Intravascular PMNs	0.00327591	0.875207
24h-BL Distance Traveled FC	72h MG/MΦ Volume	0.0572633	0.239046
24h-BL Distance Traveled FC	72h MG/MΦ Sphericity	0.000805053	0.890565
24h-BL Distance Traveled FC	72h MG/MΦ Distance to PMN	0.215301	0.0194674
24h-BL Distance Traveled FC	72h PMN Volume	0.231517	0.0148902
24h-BL Distance Traveled FC	72h PMN Sphericity	0.0410615	0.33133
24h-BL Distance Traveled FC	72h PMN Distance to Vessel	0.258918	0.0184896
24h-BL Distance Traveled FC	72h % Intravascular PMNs	0.332965	0.00616842
24h-BL Average Speed FC	24h-BL Average Speed FC	1	0
24h-BL Average Speed FC	24h-BL % Time Moving FC	0.435495	2.41087e-17
24h-BL Average Speed FC	24h-BL Border-Center Transitions FC	0.82488	1.20778e-50
24h-BL Average Speed FC	24h-BL Delta Laterality	0.0622091	0.00421374
24h-BL Average Speed FC	72h-BL Distance Traveled FC	0.0540733	0.0292444
24h-BL Average Speed FC	72h-BL Average Speed FC	0.0546496	0.0283726
24h-BL Average Speed FC	72h-BL % Time Moving FC	2.09756e-05	0.966818
24h-BL Average Speed FC	72h-BL Border-Center Transitions FC	0.00983404	0.357973
24h-BL Average Speed FC	72h-BL Delta Laterality	0.0321877	0.0944172
24h-BL Average Speed FC	72h-24h Distance Traveled FC	0.0271817	0.143894
24h-BL Average Speed FC	72h-24h Average Speed FC	0.0268592	0.146327
24h-BL Average Speed FC	72h-24h % Time Moving FC	0.0553429	0.0809263
24h-BL Average Speed FC	72h-24h Border-Center Transitions FC	0.0815304	0.0329094
24h-BL Average Speed FC	72h-24h Delta Laterality	0.00162304	0.707775
24h-BL Average Speed FC	Baseline % Red Pixels	0.0142777	0.27316
24h-BL Average Speed FC	Ischemia % Red Pixels	0.0197777	0.196522
24h-BL Average Speed FC	Reperfusion % Red Pixels	0.000498585	0.838302
24h-BL Average Speed FC	Endpoint % Red Pixels	0.0158304	0.254116
24h-BL Average Speed FC	Baseline % Yellow Pixels	0.0119422	0.316538
24h-BL Average Speed FC	Ischemia % Yellow Pixels	0.00347538	0.589769
24h-BL Average Speed FC	Reperfusion % Yellow Pixels	1.32281e-05	0.973487
24h-BL Average Speed FC	Endpoint % Yellow Pixels	0.0109662	0.34313
24h-BL Average Speed FC	Baseline % Green Pixels	0.00775696	0.420025
24h-BL Average Speed FC	Ischemia % Green Pixels	0.00580883	0.48551
24h-BL Average Speed FC	Reperfusion % Green Pixels	0.00108748	0.763093
24h-BL Average Speed FC	Endpoint % Green Pixels	0.016712	0.241199
24h-BL Average Speed FC	Baseline % Cyan Pixels	0.0103925	0.350311
24h-BL Average Speed FC	Ischemia % Cyan Pixels	0.0206426	0.186918
24h-BL Average Speed FC	Reperfusion % Cyan Pixels	0.00171788	0.704759
24h-BL Average Speed FC	Endpoint % Cyan Pixels	0.00779701	0.42445
24h-BL Average Speed FC	Baseline % Blue Pixels	0.00830872	0.403898
24h-BL Average Speed FC	Ischemia % Blue Pixels	0.0336355	0.0909777
24h-BL Average Speed FC	Reperfusion % Blue Pixels	2.23917e-05	0.96551
24h-BL Average Speed FC	Endpoint % Blue Pixels	0.00414472	0.560694
24h-BL Average Speed FC	Baseline Speckle Score	0.0120329	0.314696
24h-BL Average Speed FC	Ischemia Speckle Score	0.0268893	0.131385
24h-BL Average Speed FC	Reperfusion Speckle Score	0.000663306	0.813911
24h-BL Average Speed FC	Endpoint Speckle Score	0.0140301	0.283218
24h-BL Average Speed FC	Baseline ROI Perfusion	5.81431e-05	0.945454
24h-BL Average Speed FC	Ischemia ROI Perfusion	0.000406909	0.856362
24h-BL Average Speed FC	Reperfusion ROI Perfusion	0.0246936	0.155972
24h-BL Average Speed FC	Endpoint ROI Perfusion	0.039068	0.0732706
24h-BL Average Speed FC	Reperfusion ROI % Baseline	0.0216964	0.183898
24h-BL Average Speed FC	24h PMN Count	0.171588	0.110678
24h-BL Average Speed FC	24h MG/MΦ Count	0.0321481	0.577131
24h-BL Average Speed FC	72h PMN Count	0.162462	0.0221741
24h-BL Average Speed FC	72h MG/MΦ Count	0.0703143	0.200179
24h-BL Average Speed FC	24h MG/MΦ Volume	0.174131	0.177129
24h-BL Average Speed FC	24h MG/MΦ Sphericity	0.00098899	0.92271
24h-BL Average Speed FC	24h MG/MΦ Distance to PMN	0.152181	0.23559
24h-BL Average Speed FC	24h PMN Volume	0.00473713	0.840639
24h-BL Average Speed FC	24h PMN Sphericity	0.00491137	0.837768
24h-BL Average Speed FC	24h PMN Distance to Vessel	0.0369633	0.594638
24h-BL Average Speed FC	24h % Intravascular PMNs	0.00342487	0.87242
24h-BL Average Speed FC	72h MG/MΦ Volume	0.0604216	0.226119
24h-BL Average Speed FC	72h MG/MΦ Sphericity	0.000867152	0.886449
24h-BL Average Speed FC	72h MG/MΦ Distance to PMN	0.215301	0.0194674
24h-BL Average Speed FC	72h PMN Volume	0.231515	0.0148907
24h-BL Average Speed FC	72h PMN Sphericity	0.0410608	0.331334
24h-BL Average Speed FC	72h PMN Distance to Vessel	0.258917	0.0184897
24h-BL Average Speed FC	72h % Intravascular PMNs	0.332965	0.00616843
24h-BL % Time Moving FC	24h-BL % Time Moving FC	1	0
24h-BL % Time Moving FC	24h-BL Border-Center Transitions FC	0.282509	1.08042e-10
24h-BL % Time Moving FC	24h-BL Delta Laterality	0.0237015	0.0839659
24h-BL % Time Moving FC	72h-BL Distance Traveled FC	0.0125576	0.30722
24h-BL % Time Moving FC	72h-BL Average Speed FC	0.0127379	0.30375
24h-BL % Time Moving FC	72h-BL % Time Moving FC	9.91586e-05	0.92793
24h-BL % Time Moving FC	72h-BL Border-Center Transitions FC	0.00971956	0.369363
24h-BL % Time Moving FC	72h-BL Delta Laterality	0.0426829	0.0578199
24h-BL % Time Moving FC	72h-24h Distance Traveled FC	0.00579804	0.507588
24h-BL % Time Moving FC	72h-24h Average Speed FC	0.0056941	0.511428
24h-BL % Time Moving FC	72h-24h % Time Moving FC	0.036212	0.160084
24h-BL % Time Moving FC	72h-24h Border-Center Transitions FC	0.044169	0.120024
24h-BL % Time Moving FC	72h-24h Delta Laterality	0.000364701	0.861454
24h-BL % Time Moving FC	Baseline % Red Pixels	0.0121427	0.312484
24h-BL % Time Moving FC	Ischemia % Red Pixels	0.0471978	0.044507
24h-BL % Time Moving FC	Reperfusion % Red Pixels	0.00689814	0.447096
24h-BL % Time Moving FC	Endpoint % Red Pixels	0.0118844	0.323584
24h-BL % Time Moving FC	Baseline % Yellow Pixels	0.0185995	0.210537
24h-BL % Time Moving FC	Ischemia % Yellow Pixels	0.000864426	0.788143
24h-BL % Time Moving FC	Reperfusion % Yellow Pixels	0.0113619	0.328659
24h-BL % Time Moving FC	Endpoint % Yellow Pixels	0.0239834	0.159545
24h-BL % Time Moving FC	Baseline % Green Pixels	0.00219693	0.668256
24h-BL % Time Moving FC	Ischemia % Green Pixels	0.02983	0.111785
24h-BL % Time Moving FC	Reperfusion % Green Pixels	0.00408872	0.558611
24h-BL % Time Moving FC	Endpoint % Green Pixels	0.00986994	0.368589
24h-BL % Time Moving FC	Baseline % Cyan Pixels	0.00637117	0.465053
24h-BL % Time Moving FC	Ischemia % Cyan Pixels	0.0245443	0.149722
24h-BL % Time Moving FC	Reperfusion % Cyan Pixels	6.23667e-05	0.94247
24h-BL % Time Moving FC	Endpoint % Cyan Pixels	0.000698072	0.811442
24h-BL % Time Moving FC	Baseline % Blue Pixels	0.00555691	0.495155
24h-BL % Time Moving FC	Ischemia % Blue Pixels	0.0277261	0.125451
24h-BL % Time Moving FC	Reperfusion % Blue Pixels	0.00353811	0.586425
24h-BL % Time Moving FC	Endpoint % Blue Pixels	0.000186074	0.901986
24h-BL % Time Moving FC	Baseline Speckle Score	0.00836168	0.402397
24h-BL % Time Moving FC	Ischemia Speckle Score	0.0433005	0.0545316
24h-BL % Time Moving FC	Reperfusion Speckle Score	0.00535074	0.503288
24h-BL % Time Moving FC	Endpoint Speckle Score	0.00717735	0.443552
24h-BL % Time Moving FC	Baseline ROI Perfusion	0.000795212	0.800219
24h-BL % Time Moving FC	Ischemia ROI Perfusion	0.00697962	0.452716
24h-BL % Time Moving FC	Reperfusion ROI Perfusion	0.0226159	0.17477
24h-BL % Time Moving FC	Endpoint ROI Perfusion	0.0504545	0.0411987
24h-BL % Time Moving FC	Reperfusion ROI % Baseline	0.0243397	0.159006
24h-BL % Time Moving FC	24h PMN Count	0.0634083	0.346798
24h-BL % Time Moving FC	24h MG/MΦ Count	0.0263198	0.614436
24h-BL % Time Moving FC	72h PMN Count	0.0935129	0.0887401
24h-BL % Time Moving FC	72h MG/MΦ Count	0.0606059	0.235519
24h-BL % Time Moving FC	24h MG/MΦ Volume	0.183632	0.164561
24h-BL % Time Moving FC	24h MG/MΦ Sphericity	0.00877229	0.772182
24h-BL % Time Moving FC	24h MG/MΦ Distance to PMN	0.0735892	0.419728
24h-BL % Time Moving FC	24h PMN Volume	0.00693343	0.807696
24h-BL % Time Moving FC	24h PMN Sphericity	7.63209e-05	0.979662
24h-BL % Time Moving FC	24h PMN Distance to Vessel	0.0251963	0.661388
24h-BL % Time Moving FC	24h % Intravascular PMNs	0.0116206	0.766911
24h-BL % Time Moving FC	72h MG/MΦ Volume	0.0419523	0.315512
24h-BL % Time Moving FC	72h MG/MΦ Sphericity	0.00290796	0.793604
24h-BL % Time Moving FC	72h MG/MΦ Distance to PMN	0.131164	0.0752263
24h-BL % Time Moving FC	72h PMN Volume	0.221871	0.0174711
24h-BL % Time Moving FC	72h PMN Sphericity	0.149323	0.0563816
24h-BL % Time Moving FC	72h PMN Distance to Vessel	0.0995971	0.163446
24h-BL % Time Moving FC	72h % Intravascular PMNs	0.132326	0.105016
24h-BL Border-Center Transitions FC	24h-BL Border-Center Transitions FC	1	0
24h-BL Border-Center Transitions FC	24h-BL Delta Laterality	0.0604634	0.00480289
24h-BL Border-Center Transitions FC	72h-BL Distance Traveled FC	0.0106075	0.339635
24h-BL Border-Center Transitions FC	72h-BL Average Speed FC	0.0107894	0.335506
24h-BL Border-Center Transitions FC	72h-BL % Time Moving FC	0.000747651	0.80382
24h-BL Border-Center Transitions FC	72h-BL Border-Center Transitions FC	0.00296647	0.614262
24h-BL Border-Center Transitions FC	72h-BL Delta Laterality	0.0318211	0.0963455
24h-BL Border-Center Transitions FC	72h-24h Distance Traveled FC	0.0133938	0.306647
24h-BL Border-Center Transitions FC	72h-24h Average Speed FC	0.0132346	0.309559
24h-BL Border-Center Transitions FC	72h-24h % Time Moving FC	0.0355136	0.164248
24h-BL Border-Center Transitions FC	72h-24h Border-Center Transitions FC	0.0565254	0.0776594
24h-BL Border-Center Transitions FC	72h-24h Delta Laterality	0.00446868	0.533662
24h-BL Border-Center Transitions FC	Baseline % Red Pixels	0.0101283	0.35654
24h-BL Border-Center Transitions FC	Ischemia % Red Pixels	0.00742441	0.430207
24h-BL Border-Center Transitions FC	Reperfusion % Red Pixels	9.7277e-05	0.928185
24h-BL Border-Center Transitions FC	Endpoint % Red Pixels	0.00394028	0.570544
24h-BL Border-Center Transitions FC	Baseline % Yellow Pixels	0.0148365	0.263904
24h-BL Border-Center Transitions FC	Ischemia % Yellow Pixels	0.00019987	0.897204
24h-BL Border-Center Transitions FC	Reperfusion % Yellow Pixels	1.13888e-07	0.997539
24h-BL Border-Center Transitions FC	Endpoint % Yellow Pixels	0.00352344	0.591715
24h-BL Border-Center Transitions FC	Baseline % Green Pixels	0.00304616	0.613752
24h-BL Border-Center Transitions FC	Ischemia % Green Pixels	0.000443573	0.847369
24h-BL Border-Center Transitions FC	Reperfusion % Green Pixels	9.39097e-05	0.929436
24h-BL Border-Center Transitions FC	Endpoint % Green Pixels	0.00420904	0.557662
24h-BL Border-Center Transitions FC	Baseline % Cyan Pixels	0.00309614	0.610854
24h-BL Border-Center Transitions FC	Ischemia % Cyan Pixels	0.0064603	0.461937
24h-BL Border-Center Transitions FC	Reperfusion % Cyan Pixels	0.00239253	0.654705
24h-BL Border-Center Transitions FC	Endpoint % Cyan Pixels	0.00124865	0.749644
24h-BL Border-Center Transitions FC	Baseline % Blue Pixels	0.0043568	0.545965
24h-BL Border-Center Transitions FC	Ischemia % Blue Pixels	0.0223256	0.169726
24h-BL Border-Center Transitions FC	Reperfusion % Blue Pixels	0.000463046	0.844096
24h-BL Border-Center Transitions FC	Endpoint % Blue Pixels	0.00053342	0.834812
24h-BL Border-Center Transitions FC	Baseline Speckle Score	0.00683317	0.449251
24h-BL Border-Center Transitions FC	Ischemia Speckle Score	0.0114409	0.326975
24h-BL Border-Center Transitions FC	Reperfusion Speckle Score	0.000211655	0.894234
24h-BL Border-Center Transitions FC	Endpoint Speckle Score	0.00317677	0.610585
24h-BL Border-Center Transitions FC	Baseline ROI Perfusion	0.0106181	0.353922
24h-BL Border-Center Transitions FC	Ischemia ROI Perfusion	0.0184566	0.22072
24h-BL Border-Center Transitions FC	Reperfusion ROI Perfusion	0.0378192	0.078118
24h-BL Border-Center Transitions FC	Endpoint ROI Perfusion	0.0727063	0.0136961
24h-BL Border-Center Transitions FC	Reperfusion ROI % Baseline	0.031413	0.108948
24h-BL Border-Center Transitions FC	24h PMN Count	0.122555	0.183763
24h-BL Border-Center Transitions FC	24h MG/MΦ Count	0.0396977	0.534719
24h-BL Border-Center Transitions FC	72h PMN Count	0.180245	0.0154396
24h-BL Border-Center Transitions FC	72h MG/MΦ Count	0.0964441	0.130809
24h-BL Border-Center Transitions FC	24h MG/MΦ Volume	0.189321	0.157459
24h-BL Border-Center Transitions FC	24h MG/MΦ Sphericity	0.000411911	0.950081
24h-BL Border-Center Transitions FC	24h MG/MΦ Distance to PMN	0.152805	0.234548
24h-BL Border-Center Transitions FC	24h PMN Volume	0.00394668	0.854407
24h-BL Border-Center Transitions FC	24h PMN Sphericity	0.000689412	0.938918
24h-BL Border-Center Transitions FC	24h PMN Distance to Vessel	0.0110646	0.772429
24h-BL Border-Center Transitions FC	24h % Intravascular PMNs	0.028121	0.643314
24h-BL Border-Center Transitions FC	72h MG/MΦ Volume	0.0375797	0.342672
24h-BL Border-Center Transitions FC	72h MG/MΦ Sphericity	0.00677633	0.689319
24h-BL Border-Center Transitions FC	72h MG/MΦ Distance to PMN	0.290376	0.00544692
24h-BL Border-Center Transitions FC	72h PMN Volume	0.147282	0.0582407
24h-BL Border-Center Transitions FC	72h PMN Sphericity	0.0343905	0.374812
24h-BL Border-Center Transitions FC	72h PMN Distance to Vessel	0.273884	0.0149085
24h-BL Border-Center Transitions FC	72h % Intravascular PMNs	0.31802	0.00775312
24h-BL Delta Laterality	24h-BL Delta Laterality	1	0
24h-BL Delta Laterality	72h-BL Distance Traveled FC	0.000646289	0.814124
24h-BL Delta Laterality	72h-BL Average Speed FC	0.000658538	0.812402
24h-BL Delta Laterality	72h-BL % Time Moving FC	0.00111664	0.761429
24h-BL Delta Laterality	72h-BL Border-Center Transitions FC	0.00106794	0.762456
24h-BL Delta Laterality	72h-BL Delta Laterality	0.366665	4.10572e-10
24h-BL Delta Laterality	72h-24h Distance Traveled FC	0.0292568	0.129264
24h-BL Delta Laterality	72h-24h Average Speed FC	0.0292164	0.129533
24h-BL Delta Laterality	72h-24h % Time Moving FC	0.0347822	0.168738
24h-BL Delta Laterality	72h-24h Border-Center Transitions FC	0.0135973	0.392079
24h-BL Delta Laterality	72h-24h Delta Laterality	0.192191	1.73156e-05
24h-BL Delta Laterality	Baseline % Red Pixels	0.000290713	0.876916
24h-BL Delta Laterality	Ischemia % Red Pixels	0.0706323	0.0139574
24h-BL Delta Laterality	Reperfusion % Red Pixels	0.108159	0.00211804
24h-BL Delta Laterality	Endpoint % Red Pixels	0.0529973	0.0351443
24h-BL Delta Laterality	Baseline % Yellow Pixels	0.0311339	0.106227
24h-BL Delta Laterality	Ischemia % Yellow Pixels	2.37831e-05	0.964668
24h-BL Delta Laterality	Reperfusion % Yellow Pixels	0.0443744	0.0529736
24h-BL Delta Laterality	Endpoint % Yellow Pixels	0.0325198	0.100694
24h-BL Delta Laterality	Baseline % Green Pixels	0.00414064	0.558494
24h-BL Delta Laterality	Ischemia % Green Pixels	0.0364118	0.0802347
24h-BL Delta Laterality	Reperfusion % Green Pixels	0.12772	0.000785944
24h-BL Delta Laterality	Endpoint % Green Pixels	0.056557	0.0293818
24h-BL Delta Laterality	Baseline % Cyan Pixels	0.00838668	0.404525
24h-BL Delta Laterality	Ischemia % Cyan Pixels	0.0547215	0.0311811
24h-BL Delta Laterality	Reperfusion % Cyan Pixels	0.131821	0.000637556
24h-BL Delta Laterality	Endpoint % Cyan Pixels	0.0224786	0.173438
24h-BL Delta Laterality	Baseline % Blue Pixels	0.0299104	0.11346
24h-BL Delta Laterality	Ischemia % Blue Pixels	0.0522687	0.0353301
24h-BL Delta Laterality	Reperfusion % Blue Pixels	0.123608	0.000968857
24h-BL Delta Laterality	Endpoint % Blue Pixels	0.0231263	0.167299
24h-BL Delta Laterality	Baseline Speckle Score	0.00571451	0.491698
24h-BL Delta Laterality	Ischemia Speckle Score	0.0717433	0.0131992
24h-BL Delta Laterality	Reperfusion Speckle Score	0.129207	0.000728544
24h-BL Delta Laterality	Endpoint Speckle Score	0.0491811	0.0426212
24h-BL Delta Laterality	Baseline ROI Perfusion	0.00654977	0.467026
24h-BL Delta Laterality	Ischemia ROI Perfusion	0.0148259	0.272831
24h-BL Delta Laterality	Reperfusion ROI Perfusion	0.0424636	0.0616225
24h-BL Delta Laterality	Endpoint ROI Perfusion	0.0195144	0.207829
24h-BL Delta Laterality	Reperfusion ROI % Baseline	0.0664372	0.0186457
24h-BL Delta Laterality	24h PMN Count	0.162025	0.122169
24h-BL Delta Laterality	24h MG/MΦ Count	0.0318924	0.578675
24h-BL Delta Laterality	72h PMN Count	0.006776	0.654235
24h-BL Delta Laterality	72h MG/MΦ Count	0.00278072	0.802326
24h-BL Delta Laterality	24h MG/MΦ Volume	0.0847044	0.358737
24h-BL Delta Laterality	24h MG/MΦ Sphericity	0.0201635	0.659777
24h-BL Delta Laterality	24h MG/MΦ Distance to PMN	0.0549143	0.487955
24h-BL Delta Laterality	24h PMN Volume	0.00561141	0.826732
24h-BL Delta Laterality	24h PMN Sphericity	0.00127585	0.916962
24h-BL Delta Laterality	24h PMN Distance to Vessel	0.00652242	0.824482
24h-BL Delta Laterality	24h % Intravascular PMNs	0.0185243	0.707726
24h-BL Delta Laterality	72h MG/MΦ Volume	0.00959501	0.634037
24h-BL Delta Laterality	72h MG/MΦ Sphericity	0.0964665	0.122516
24h-BL Delta Laterality	72h MG/MΦ Distance to PMN	0.00401477	0.763496
24h-BL Delta Laterality	72h PMN Volume	3.06137e-05	0.979059
24h-BL Delta Laterality	72h PMN Sphericity	0.0140258	0.572872
24h-BL Delta Laterality	72h PMN Distance to Vessel	0.0222613	0.518608
24h-BL Delta Laterality	72h % Intravascular PMNs	0.0690172	0.249927
72h-BL Distance Traveled FC	72h-BL Distance Traveled FC	1	0
72h-BL Distance Traveled FC	72h-BL Average Speed FC	0.999824	1.12194e-172
72h-BL Distance Traveled FC	72h-BL % Time Moving FC	0.124669	0.000641407
72h-BL Distance Traveled FC	72h-BL Border-Center Transitions FC	0.6533	1.1999e-22
72h-BL Distance Traveled FC	72h-BL Delta Laterality	0.0101725	0.336077
72h-BL Distance Traveled FC	72h-24h Distance Traveled FC	0.0318203	0.113395
72h-BL Distance Traveled FC	72h-24h Average Speed FC	0.0318135	0.113434
72h-BL Distance Traveled FC	72h-24h % Time Moving FC	0.078119	0.0369632
72h-BL Distance Traveled FC	72h-24h Border-Center Transitions FC	0.0363443	0.159308
72h-BL Distance Traveled FC	72h-24h Delta Laterality	0.0182892	0.209014
72h-BL Distance Traveled FC	Baseline % Red Pixels	0.0288787	0.219253
72h-BL Distance Traveled FC	Ischemia % Red Pixels	0.0533854	0.0927655
72h-BL Distance Traveled FC	Reperfusion % Red Pixels	0.016539	0.354037
72h-BL Distance Traveled FC	Endpoint % Red Pixels	0.000266479	0.906734
72h-BL Distance Traveled FC	Baseline % Yellow Pixels	0.19289	0.000892316
72h-BL Distance Traveled FC	Ischemia % Yellow Pixels	0.0686549	0.0556219
72h-BL Distance Traveled FC	Reperfusion % Yellow Pixels	0.0366251	0.165664
72h-BL Distance Traveled FC	Endpoint % Yellow Pixels	0.000747334	0.844435
72h-BL Distance Traveled FC	Baseline % Green Pixels	0.0406548	0.143722
72h-BL Distance Traveled FC	Ischemia % Green Pixels	0.0745191	0.0458067
72h-BL Distance Traveled FC	Reperfusion % Green Pixels	0.00947083	0.483883
72h-BL Distance Traveled FC	Endpoint % Green Pixels	0.0014505	0.784531
72h-BL Distance Traveled FC	Baseline % Cyan Pixels	0.000163252	0.926938
72h-BL Distance Traveled FC	Ischemia % Cyan Pixels	0.0532512	0.0931884
72h-BL Distance Traveled FC	Reperfusion % Cyan Pixels	1.79234e-05	0.975762
72h-BL Distance Traveled FC	Endpoint % Cyan Pixels	0.00165339	0.770338
72h-BL Distance Traveled FC	Baseline % Blue Pixels	0.00539341	0.597669
72h-BL Distance Traveled FC	Ischemia % Blue Pixels	0.0262721	0.241606
72h-BL Distance Traveled FC	Reperfusion % Blue Pixels	0.000166279	0.926265
72h-BL Distance Traveled FC	Endpoint % Blue Pixels	1.97726e-08	0.999195
72h-BL Distance Traveled FC	Baseline Speckle Score	0.00114738	0.807881
72h-BL Distance Traveled FC	Ischemia Speckle Score	0.0624573	0.0683703
72h-BL Distance Traveled FC	Reperfusion Speckle Score	0.0100301	0.471188
72h-BL Distance Traveled FC	Endpoint Speckle Score	0.000559584	0.865177
72h-BL Distance Traveled FC	Baseline ROI Perfusion	0.0079108	0.522453
72h-BL Distance Traveled FC	Ischemia ROI Perfusion	0.0490674	0.107452
72h-BL Distance Traveled FC	Reperfusion ROI Perfusion	0.00816135	0.515913
72h-BL Distance Traveled FC	Endpoint ROI Perfusion	0.000442321	0.880016
72h-BL Distance Traveled FC	Reperfusion ROI % Baseline	0.044158	0.127223
72h-BL Distance Traveled FC	24h PMN Count	NA	NA
72h-BL Distance Traveled FC	24h MG/MΦ Count	NA	NA
72h-BL Distance Traveled FC	72h PMN Count	0.0238642	0.383029
72h-BL Distance Traveled FC	72h MG/MΦ Count	0.00910924	0.635821
72h-BL Distance Traveled FC	24h MG/MΦ Volume	NA	NA
72h-BL Distance Traveled FC	24h MG/MΦ Sphericity	NA	NA
72h-BL Distance Traveled FC	24h MG/MΦ Distance to PMN	NA	NA
72h-BL Distance Traveled FC	24h PMN Volume	NA	NA
72h-BL Distance Traveled FC	24h PMN Sphericity	NA	NA
72h-BL Distance Traveled FC	24h PMN Distance to Vessel	NA	NA
72h-BL Distance Traveled FC	24h % Intravascular PMNs	NA	NA
72h-BL Distance Traveled FC	72h MG/MΦ Volume	0.00466981	0.729705
72h-BL Distance Traveled FC	72h MG/MΦ Sphericity	0.0622655	0.200347
72h-BL Distance Traveled FC	72h MG/MΦ Distance to PMN	0.101797	0.104774
72h-BL Distance Traveled FC	72h PMN Volume	0.0125936	0.577328
72h-BL Distance Traveled FC	72h PMN Sphericity	0.0310746	0.379103
72h-BL Distance Traveled FC	72h PMN Distance to Vessel	0.0411215	0.353419
72h-BL Distance Traveled FC	72h % Intravascular PMNs	0.0609164	0.256234
72h-BL Average Speed FC	72h-BL Average Speed FC	1	0
72h-BL Average Speed FC	72h-BL % Time Moving FC	0.124869	0.000634551
72h-BL Average Speed FC	72h-BL Border-Center Transitions FC	0.653065	1.23763e-22
72h-BL Average Speed FC	72h-BL Delta Laterality	0.0104113	0.330438
72h-BL Average Speed FC	72h-24h Distance Traveled FC	0.031566	0.11487
72h-BL Average Speed FC	72h-24h Average Speed FC	0.0316084	0.114623
72h-BL Average Speed FC	72h-24h % Time Moving FC	0.0781186	0.0369636
72h-BL Average Speed FC	72h-24h Border-Center Transitions FC	0.0363438	0.159311
72h-BL Average Speed FC	72h-24h Delta Laterality	0.0187322	0.203534
72h-BL Average Speed FC	Baseline % Red Pixels	0.0288784	0.219255
72h-BL Average Speed FC	Ischemia % Red Pixels	0.0533849	0.0927671
72h-BL Average Speed FC	Reperfusion % Red Pixels	0.0165396	0.354029
72h-BL Average Speed FC	Endpoint % Red Pixels	0.000266427	0.906743
72h-BL Average Speed FC	Baseline % Yellow Pixels	0.192891	0.000892283
72h-BL Average Speed FC	Ischemia % Yellow Pixels	0.0686577	0.0556169
72h-BL Average Speed FC	Reperfusion % Yellow Pixels	0.0366269	0.165653
72h-BL Average Speed FC	Endpoint % Yellow Pixels	0.00074753	0.844415
72h-BL Average Speed FC	Baseline % Green Pixels	0.040654	0.143726
72h-BL Average Speed FC	Ischemia % Green Pixels	0.074518	0.0458083
72h-BL Average Speed FC	Reperfusion % Green Pixels	0.00947101	0.483879
72h-BL Average Speed FC	Endpoint % Green Pixels	0.00145041	0.784537
72h-BL Average Speed FC	Baseline % Cyan Pixels	0.000163303	0.926927
72h-BL Average Speed FC	Ischemia % Cyan Pixels	0.0532521	0.0931857
72h-BL Average Speed FC	Reperfusion % Cyan Pixels	1.79181e-05	0.975765
72h-BL Average Speed FC	Endpoint % Cyan Pixels	0.00165349	0.770332
72h-BL Average Speed FC	Baseline % Blue Pixels	0.00539357	0.597663
72h-BL Average Speed FC	Ischemia % Blue Pixels	0.0262728	0.2416
72h-BL Average Speed FC	Reperfusion % Blue Pixels	0.000166305	0.92626
72h-BL Average Speed FC	Endpoint % Blue Pixels	1.92873e-08	0.999205
72h-BL Average Speed FC	Baseline Speckle Score	0.00114731	0.807887
72h-BL Average Speed FC	Ischemia Speckle Score	0.0624576	0.0683697
72h-BL Average Speed FC	Reperfusion Speckle Score	0.0100304	0.471182
72h-BL Average Speed FC	Endpoint Speckle Score	0.000559548	0.865181
72h-BL Average Speed FC	Baseline ROI Perfusion	0.00791082	0.522453
72h-BL Average Speed FC	Ischemia ROI Perfusion	0.0490674	0.107452
72h-BL Average Speed FC	Reperfusion ROI Perfusion	0.0081606	0.515932
72h-BL Average Speed FC	Endpoint ROI Perfusion	0.000442072	0.880049
72h-BL Average Speed FC	Reperfusion ROI % Baseline	0.0441584	0.127221
72h-BL Average Speed FC	24h PMN Count	NA	NA
72h-BL Average Speed FC	24h MG/MΦ Count	NA	NA
72h-BL Average Speed FC	72h PMN Count	0.0238627	0.383044
72h-BL Average Speed FC	72h MG/MΦ Count	0.00911026	0.635802
72h-BL Average Speed FC	24h MG/MΦ Volume	NA	NA
72h-BL Average Speed FC	24h MG/MΦ Sphericity	NA	NA
72h-BL Average Speed FC	24h MG/MΦ Distance to PMN	NA	NA
72h-BL Average Speed FC	24h PMN Volume	NA	NA
72h-BL Average Speed FC	24h PMN Sphericity	NA	NA
72h-BL Average Speed FC	24h PMN Distance to Vessel	NA	NA
72h-BL Average Speed FC	24h % Intravascular PMNs	NA	NA
72h-BL Average Speed FC	72h MG/MΦ Volume	0.0046697	0.729708
72h-BL Average Speed FC	72h MG/MΦ Sphericity	0.062276	0.200308
72h-BL Average Speed FC	72h MG/MΦ Distance to PMN	0.101799	0.104771
72h-BL Average Speed FC	72h PMN Volume	0.0125898	0.577386
72h-BL Average Speed FC	72h PMN Sphericity	0.0310787	0.379071
72h-BL Average Speed FC	72h PMN Distance to Vessel	0.0411248	0.353399
72h-BL Average Speed FC	72h % Intravascular PMNs	0.0609278	0.256189
72h-BL % Time Moving FC	72h-BL % Time Moving FC	1	0
72h-BL % Time Moving FC	72h-BL Border-Center Transitions FC	0.337607	1.92454e-09
72h-BL % Time Moving FC	72h-BL Delta Laterality	0.0654015	0.0149815
72h-BL % Time Moving FC	72h-24h Distance Traveled FC	0.00277509	0.646912
72h-BL % Time Moving FC	72h-24h Average Speed FC	0.0028024	0.645295
72h-BL % Time Moving FC	72h-24h % Time Moving FC	0.0570303	0.0763067
72h-BL % Time Moving FC	72h-24h Border-Center Transitions FC	0.0277909	0.219451
72h-BL % Time Moving FC	72h-24h Delta Laterality	0.108505	0.00208147
72h-BL % Time Moving FC	Baseline % Red Pixels	0.0213557	0.29169
72h-BL % Time Moving FC	Ischemia % Red Pixels	0.0710242	0.05142
72h-BL % Time Moving FC	Reperfusion % Red Pixels	0.0146843	0.382737
72h-BL % Time Moving FC	Endpoint % Red Pixels	0.000242196	0.911067
72h-BL % Time Moving FC	Baseline % Yellow Pixels	0.161306	0.00261113
72h-BL % Time Moving FC	Ischemia % Yellow Pixels	0.0325674	0.191601
72h-BL % Time Moving FC	Reperfusion % Yellow Pixels	0.032508	0.192013
72h-BL % Time Moving FC	Endpoint % Yellow Pixels	0.000587751	0.861858
72h-BL % Time Moving FC	Baseline % Green Pixels	0.0375712	0.160198
72h-BL % Time Moving FC	Ischemia % Green Pixels	0.0867681	0.030605
72h-BL % Time Moving FC	Reperfusion % Green Pixels	0.00883143	0.499093
72h-BL % Time Moving FC	Endpoint % Green Pixels	0.00123459	0.800857
72h-BL % Time Moving FC	Baseline % Cyan Pixels	0.00082759	0.836404
72h-BL % Time Moving FC	Ischemia % Cyan Pixels	0.0532019	0.0933442
72h-BL % Time Moving FC	Reperfusion % Cyan Pixels	1.18591e-08	0.999376
72h-BL % Time Moving FC	Endpoint % Cyan Pixels	0.00132663	0.793725
72h-BL % Time Moving FC	Baseline % Blue Pixels	0.00733007	0.538188
72h-BL % Time Moving FC	Ischemia % Blue Pixels	0.0271951	0.233396
72h-BL % Time Moving FC	Reperfusion % Blue Pixels	0.000745582	0.844615
72h-BL % Time Moving FC	Endpoint % Blue Pixels	8.17059e-06	0.983634
72h-BL % Time Moving FC	Baseline Speckle Score	0.000297177	0.901534
72h-BL % Time Moving FC	Ischemia Speckle Score	0.0716697	0.0503326
72h-BL % Time Moving FC	Reperfusion Speckle Score	0.00867564	0.50292
72h-BL % Time Moving FC	Endpoint Speckle Score	0.000501756	0.872272
72h-BL % Time Moving FC	Baseline ROI Perfusion	0.0207424	0.298801
72h-BL % Time Moving FC	Ischemia ROI Perfusion	0.0298983	0.211174
72h-BL % Time Moving FC	Reperfusion ROI Perfusion	0.000733716	0.845841
72h-BL % Time Moving FC	Endpoint ROI Perfusion	0.01121	0.446074
72h-BL % Time Moving FC	Reperfusion ROI % Baseline	0.0240653	0.262675
72h-BL % Time Moving FC	24h PMN Count	NA	NA
72h-BL % Time Moving FC	24h MG/MΦ Count	NA	NA
72h-BL % Time Moving FC	72h PMN Count	0.031206	0.317596
72h-BL % Time Moving FC	72h MG/MΦ Count	0.0216445	0.463993
72h-BL % Time Moving FC	24h MG/MΦ Volume	NA	NA
72h-BL % Time Moving FC	24h MG/MΦ Sphericity	NA	NA
72h-BL % Time Moving FC	24h MG/MΦ Distance to PMN	NA	NA
72h-BL % Time Moving FC	24h PMN Volume	NA	NA
72h-BL % Time Moving FC	24h PMN Sphericity	NA	NA
72h-BL % Time Moving FC	24h PMN Distance to Vessel	NA	NA
72h-BL % Time Moving FC	24h % Intravascular PMNs	NA	NA
72h-BL % Time Moving FC	72h MG/MΦ Volume	0.00299235	0.782189
72h-BL % Time Moving FC	72h MG/MΦ Sphericity	0.0873519	0.12677
72h-BL % Time Moving FC	72h MG/MΦ Distance to PMN	0.117163	0.0805217
72h-BL % Time Moving FC	72h PMN Volume	0.0770616	0.160937
72h-BL % Time Moving FC	72h PMN Sphericity	0.00238809	0.808737
72h-BL % Time Moving FC	72h PMN Distance to Vessel	0.110602	0.121017
72h-BL % Time Moving FC	72h % Intravascular PMNs	0.200412	0.0321883
72h-BL Border-Center Transitions FC	72h-BL Border-Center Transitions FC	1	0
72h-BL Border-Center Transitions FC	72h-BL Delta Laterality	0.019361	0.183456
72h-BL Border-Center Transitions FC	72h-24h Distance Traveled FC	0.142321	0.000561516
72h-BL Border-Center Transitions FC	72h-24h Average Speed FC	0.142342	0.000560938
72h-BL Border-Center Transitions FC	72h-24h % Time Moving FC	0.0449295	0.116809
72h-BL Border-Center Transitions FC	72h-24h Border-Center Transitions FC	0.0595483	0.0699186
72h-BL Border-Center Transitions FC	72h-24h Delta Laterality	0.0496325	0.0369505
72h-BL Border-Center Transitions FC	Baseline % Red Pixels	0.0800575	0.0381603
72h-BL Border-Center Transitions FC	Ischemia % Red Pixels	0.0617887	0.0699158
72h-BL Border-Center Transitions FC	Reperfusion % Red Pixels	0.0131368	0.409219
72h-BL Border-Center Transitions FC	Endpoint % Red Pixels	0.000268752	0.906339
72h-BL Border-Center Transitions FC	Baseline % Yellow Pixels	0.221693	0.000326677
72h-BL Border-Center Transitions FC	Ischemia % Yellow Pixels	0.0498713	0.104541
72h-BL Border-Center Transitions FC	Reperfusion % Yellow Pixels	0.0353192	0.173554
72h-BL Border-Center Transitions FC	Endpoint % Yellow Pixels	0.000946361	0.82523
72h-BL Border-Center Transitions FC	Baseline % Green Pixels	0.0783569	0.0403589
72h-BL Border-Center Transitions FC	Ischemia % Green Pixels	0.0986764	0.0207094
72h-BL Border-Center Transitions FC	Reperfusion % Green Pixels	0.00389359	0.653978
72h-BL Border-Center Transitions FC	Endpoint % Green Pixels	0.00227967	0.731715
72h-BL Border-Center Transitions FC	Baseline % Cyan Pixels	0.0114155	0.441913
72h-BL Border-Center Transitions FC	Ischemia % Cyan Pixels	0.0461194	0.118891
72h-BL Border-Center Transitions FC	Reperfusion % Cyan Pixels	1.46184e-05	0.97811
72h-BL Border-Center Transitions FC	Endpoint % Cyan Pixels	0.000537471	0.867843
72h-BL Border-Center Transitions FC	Baseline % Blue Pixels	0.00398836	0.650062
72h-BL Border-Center Transitions FC	Ischemia % Blue Pixels	0.016531	0.354155
72h-BL Border-Center Transitions FC	Reperfusion % Blue Pixels	0.0102394	0.466575
72h-BL Border-Center Transitions FC	Endpoint % Blue Pixels	0.000726526	0.846589
72h-BL Border-Center Transitions FC	Baseline Speckle Score	0.0262556	0.241756
72h-BL Border-Center Transitions FC	Ischemia Speckle Score	0.0615799	0.0704057
72h-BL Border-Center Transitions FC	Reperfusion Speckle Score	0.00868032	0.502804
72h-BL Border-Center Transitions FC	Endpoint Speckle Score	0.000435204	0.880978
72h-BL Border-Center Transitions FC	Baseline ROI Perfusion	0.00134266	0.79251
72h-BL Border-Center Transitions FC	Ischemia ROI Perfusion	0.0688497	0.0552636
72h-BL Border-Center Transitions FC	Reperfusion ROI Perfusion	0.0103539	0.46408
72h-BL Border-Center Transitions FC	Endpoint ROI Perfusion	0.000707083	0.848632
72h-BL Border-Center Transitions FC	Reperfusion ROI % Baseline	0.0432493	0.131295
72h-BL Border-Center Transitions FC	24h PMN Count	NA	NA
72h-BL Border-Center Transitions FC	24h MG/MΦ Count	NA	NA
72h-BL Border-Center Transitions FC	72h PMN Count	0.00855017	0.60298
72h-BL Border-Center Transitions FC	72h MG/MΦ Count	0.0104955	0.611113
72h-BL Border-Center Transitions FC	24h MG/MΦ Volume	NA	NA
72h-BL Border-Center Transitions FC	24h MG/MΦ Sphericity	NA	NA
72h-BL Border-Center Transitions FC	24h MG/MΦ Distance to PMN	NA	NA
72h-BL Border-Center Transitions FC	24h PMN Volume	NA	NA
72h-BL Border-Center Transitions FC	24h PMN Sphericity	NA	NA
72h-BL Border-Center Transitions FC	24h PMN Distance to Vessel	NA	NA
72h-BL Border-Center Transitions FC	24h % Intravascular PMNs	NA	NA
72h-BL Border-Center Transitions FC	72h MG/MΦ Volume	0.00773395	0.656322
72h-BL Border-Center Transitions FC	72h MG/MΦ Sphericity	0.0381958	0.318928
72h-BL Border-Center Transitions FC	72h MG/MΦ Distance to PMN	0.0520336	0.252471
72h-BL Border-Center Transitions FC	72h PMN Volume	1.93682e-06	0.994503
72h-BL Border-Center Transitions FC	72h PMN Sphericity	0.0227574	0.452598
72h-BL Border-Center Transitions FC	72h PMN Distance to Vessel	0.0328688	0.407739
72h-BL Border-Center Transitions FC	72h % Intravascular PMNs	0.0268554	0.454962
72h-BL Delta Laterality	72h-BL Delta Laterality	1	0
72h-BL Delta Laterality	72h-24h Distance Traveled FC	0.0362787	0.0905827
72h-BL Delta Laterality	72h-24h Average Speed FC	0.0367085	0.0886588
72h-BL Delta Laterality	72h-24h % Time Moving FC	0.0215407	0.280412
72h-BL Delta Laterality	72h-24h Border-Center Transitions FC	0.0125922	0.410278
72h-BL Delta Laterality	72h-24h Delta Laterality	0.207773	8.09135e-06
72h-BL Delta Laterality	Baseline % Red Pixels	0.0083968	0.509894
72h-BL Delta Laterality	Ischemia % Red Pixels	1.80337e-06	0.992311
72h-BL Delta Laterality	Reperfusion % Red Pixels	0.00976264	0.477192
72h-BL Delta Laterality	Endpoint % Red Pixels	0.00398227	0.650312
72h-BL Delta Laterality	Baseline % Yellow Pixels	0.0423193	0.135609
72h-BL Delta Laterality	Ischemia % Yellow Pixels	0.0131903	0.408261
72h-BL Delta Laterality	Reperfusion % Yellow Pixels	0.000497554	0.872803
72h-BL Delta Laterality	Endpoint % Yellow Pixels	0.0187342	0.323678
72h-BL Delta Laterality	Baseline % Green Pixels	0.00184002	0.758096
72h-BL Delta Laterality	Ischemia % Green Pixels	0.00260658	0.713892
72h-BL Delta Laterality	Reperfusion % Green Pixels	0.0173282	0.342706
72h-BL Delta Laterality	Endpoint % Green Pixels	0.00142667	0.786265
72h-BL Delta Laterality	Baseline % Cyan Pixels	0.00078006	0.841108
72h-BL Delta Laterality	Ischemia % Cyan Pixels	0.000341071	0.894551
72h-BL Delta Laterality	Reperfusion % Cyan Pixels	0.0335129	0.185171
72h-BL Delta Laterality	Endpoint % Cyan Pixels	0.000940248	0.825786
72h-BL Delta Laterality	Baseline % Blue Pixels	0.000228669	0.913577
72h-BL Delta Laterality	Ischemia % Blue Pixels	0.000483207	0.874636
72h-BL Delta Laterality	Reperfusion % Blue Pixels	0.00465802	0.623873
72h-BL Delta Laterality	Endpoint % Blue Pixels	0.000401827	0.885601
72h-BL Delta Laterality	Baseline Speckle Score	0.00171428	0.766266
72h-BL Delta Laterality	Ischemia Speckle Score	3.40988e-05	0.966573
72h-BL Delta Laterality	Reperfusion Speckle Score	0.0135775	0.401418
72h-BL Delta Laterality	Endpoint Speckle Score	0.00140223	0.788061
72h-BL Delta Laterality	Baseline ROI Perfusion	0.00240009	0.724993
72h-BL Delta Laterality	Ischemia ROI Perfusion	0.00285942	0.700957
72h-BL Delta Laterality	Reperfusion ROI Perfusion	0.0204228	0.302593
72h-BL Delta Laterality	Endpoint ROI Perfusion	0.0148979	0.379271
72h-BL Delta Laterality	Reperfusion ROI % Baseline	0.00883331	0.499047
72h-BL Delta Laterality	24h PMN Count	NA	NA
72h-BL Delta Laterality	24h MG/MΦ Count	NA	NA
72h-BL Delta Laterality	72h PMN Count	0.00622607	0.657348
72h-BL Delta Laterality	72h MG/MΦ Count	6.60344e-05	0.967912
72h-BL Delta Laterality	24h MG/MΦ Volume	NA	NA
72h-BL Delta Laterality	24h MG/MΦ Sphericity	NA	NA
72h-BL Delta Laterality	24h MG/MΦ Distance to PMN	NA	NA
72h-BL Delta Laterality	24h PMN Volume	NA	NA
72h-BL Delta Laterality	24h PMN Sphericity	NA	NA
72h-BL Delta Laterality	24h PMN Distance to Vessel	NA	NA
72h-BL Delta Laterality	24h % Intravascular PMNs	NA	NA
72h-BL Delta Laterality	72h MG/MΦ Volume	0.0034943	0.765097
72h-BL Delta Laterality	72h MG/MΦ Sphericity	0.286828	0.00331355
72h-BL Delta Laterality	72h MG/MΦ Distance to PMN	0.0117203	0.59092
72h-BL Delta Laterality	72h PMN Volume	0.000383901	0.922725
72h-BL Delta Laterality	72h PMN Sphericity	0.021429	0.466251
72h-BL Delta Laterality	72h PMN Distance to Vessel	0.038181	0.371589
72h-BL Delta Laterality	72h % Intravascular PMNs	0.0798022	0.191543
72h-24h Distance Traveled FC	72h-24h Distance Traveled FC	1	0
72h-24h Distance Traveled FC	72h-24h Average Speed FC	0.999895	6.19918e-157
72h-24h Distance Traveled FC	72h-24h % Time Moving FC	0.544096	8.89587e-11
72h-24h Distance Traveled FC	72h-24h Border-Center Transitions FC	0.545863	7.99848e-11
72h-24h Distance Traveled FC	72h-24h Delta Laterality	1.37986e-05	0.973912
72h-24h Distance Traveled FC	Baseline % Red Pixels	0.000154869	0.932367
72h-24h Distance Traveled FC	Ischemia % Red Pixels	0.000108027	0.943494
72h-24h Distance Traveled FC	Reperfusion % Red Pixels	0.023793	0.289953
72h-24h Distance Traveled FC	Endpoint % Red Pixels	0.0114365	0.464556
72h-24h Distance Traveled FC	Baseline % Yellow Pixels	0.00176147	0.774624
72h-24h Distance Traveled FC	Ischemia % Yellow Pixels	0.00659405	0.579121
72h-24h Distance Traveled FC	Reperfusion % Yellow Pixels	0.0123766	0.446649
72h-24h Distance Traveled FC	Endpoint % Yellow Pixels	0.0149439	0.402721
72h-24h Distance Traveled FC	Baseline % Green Pixels	2.32352e-05	0.973777
72h-24h Distance Traveled FC	Ischemia % Green Pixels	0.00355846	0.683896
72h-24h Distance Traveled FC	Reperfusion % Green Pixels	0.0309884	0.226313
72h-24h Distance Traveled FC	Endpoint % Green Pixels	0.00469864	0.639791
72h-24h Distance Traveled FC	Baseline % Cyan Pixels	0.00149958	0.791647
72h-24h Distance Traveled FC	Ischemia % Cyan Pixels	5.71084e-05	0.9589
72h-24h Distance Traveled FC	Reperfusion % Cyan Pixels	0.0130025	0.435306
72h-24h Distance Traveled FC	Endpoint % Cyan Pixels	0.0188113	0.347348
72h-24h Distance Traveled FC	Baseline % Blue Pixels	0.00373329	0.676639
72h-24h Distance Traveled FC	Ischemia % Blue Pixels	0.00604463	0.595429
72h-24h Distance Traveled FC	Reperfusion % Blue Pixels	0.00377889	0.67478
72h-24h Distance Traveled FC	Endpoint % Blue Pixels	0.0181292	0.356324
72h-24h Distance Traveled FC	Baseline Speckle Score	0.00154086	0.788864
72h-24h Distance Traveled FC	Ischemia Speckle Score	0.000345585	0.899114
72h-24h Distance Traveled FC	Reperfusion Speckle Score	0.0243701	0.284107
72h-24h Distance Traveled FC	Endpoint Speckle Score	0.0117619	0.458232
72h-24h Distance Traveled FC	Baseline ROI Perfusion	0.0021118	0.753869
72h-24h Distance Traveled FC	Ischemia ROI Perfusion	0.000702158	0.856579
72h-24h Distance Traveled FC	Reperfusion ROI Perfusion	0.00605555	0.595095
72h-24h Distance Traveled FC	Endpoint ROI Perfusion	0.00379822	0.673995
72h-24h Distance Traveled FC	Reperfusion ROI % Baseline	0.0567261	0.099357
72h-24h Distance Traveled FC	24h PMN Count	NA	NA
72h-24h Distance Traveled FC	24h MG/MΦ Count	NA	NA
72h-24h Distance Traveled FC	72h PMN Count	0.0410305	0.283047
72h-24h Distance Traveled FC	72h MG/MΦ Count	0.0255583	0.455542
72h-24h Distance Traveled FC	24h MG/MΦ Volume	NA	NA
72h-24h Distance Traveled FC	24h MG/MΦ Sphericity	NA	NA
72h-24h Distance Traveled FC	24h MG/MΦ Distance to PMN	NA	NA
72h-24h Distance Traveled FC	24h PMN Volume	NA	NA
72h-24h Distance Traveled FC	24h PMN Sphericity	NA	NA
72h-24h Distance Traveled FC	24h PMN Distance to Vessel	NA	NA
72h-24h Distance Traveled FC	24h % Intravascular PMNs	NA	NA
72h-24h Distance Traveled FC	72h MG/MΦ Volume	0.0199692	0.50045
72h-24h Distance Traveled FC	72h MG/MΦ Sphericity	0.0125379	0.594115
72h-24h Distance Traveled FC	72h MG/MΦ Distance to PMN	0.0072271	0.692875
72h-24h Distance Traveled FC	72h PMN Volume	0.00114614	0.87521
72h-24h Distance Traveled FC	72h PMN Sphericity	0.0115842	0.616661
72h-24h Distance Traveled FC	72h PMN Distance to Vessel	0.0178886	0.574006
72h-24h Distance Traveled FC	72h % Intravascular PMNs	0.0491673	0.347445
72h-24h Average Speed FC	72h-24h Average Speed FC	1	0
72h-24h Average Speed FC	72h-24h % Time Moving FC	0.543957	8.97044e-11
72h-24h Average Speed FC	72h-24h Border-Center Transitions FC	0.545941	7.96096e-11
72h-24h Average Speed FC	72h-24h Delta Laterality	2.64703e-05	0.963873
72h-24h Average Speed FC	Baseline % Red Pixels	0.000149259	0.933601
72h-24h Average Speed FC	Ischemia % Red Pixels	0.000108283	0.943427
72h-24h Average Speed FC	Reperfusion % Red Pixels	0.0236842	0.291073
72h-24h Average Speed FC	Endpoint % Red Pixels	0.0114485	0.46432
72h-24h Average Speed FC	Baseline % Yellow Pixels	0.00178556	0.773129
72h-24h Average Speed FC	Ischemia % Yellow Pixels	0.00659896	0.578979
72h-24h Average Speed FC	Reperfusion % Yellow Pixels	0.0122937	0.448184
72h-24h Average Speed FC	Endpoint % Yellow Pixels	0.0149451	0.402701
72h-24h Average Speed FC	Baseline % Green Pixels	2.07221e-05	0.975236
72h-24h Average Speed FC	Ischemia % Green Pixels	0.00357659	0.683134
72h-24h Average Speed FC	Reperfusion % Green Pixels	0.0308762	0.227169
72h-24h Average Speed FC	Endpoint % Green Pixels	0.00470936	0.639409
72h-24h Average Speed FC	Baseline % Cyan Pixels	0.00149375	0.792044
72h-24h Average Speed FC	Ischemia % Cyan Pixels	5.55324e-05	0.95947
72h-24h Average Speed FC	Reperfusion % Cyan Pixels	0.0129521	0.436203
72h-24h Average Speed FC	Endpoint % Cyan Pixels	0.0188262	0.347155
72h-24h Average Speed FC	Baseline % Blue Pixels	0.00372581	0.676946
72h-24h Average Speed FC	Ischemia % Blue Pixels	0.00607243	0.594581
72h-24h Average Speed FC	Reperfusion % Blue Pixels	0.00375492	0.675756
72h-24h Average Speed FC	Endpoint % Blue Pixels	0.0181422	0.356151
72h-24h Average Speed FC	Baseline Speckle Score	0.00152916	0.789649
72h-24h Average Speed FC	Ischemia Speckle Score	0.000347917	0.898776
72h-24h Average Speed FC	Reperfusion Speckle Score	0.0242664	0.285147
72h-24h Average Speed FC	Endpoint Speckle Score	0.0117759	0.457965
72h-24h Average Speed FC	Baseline ROI Perfusion	0.00211244	0.753833
72h-24h Average Speed FC	Ischemia ROI Perfusion	0.000708955	0.855893
72h-24h Average Speed FC	Reperfusion ROI Perfusion	0.0060165	0.596289
72h-24h Average Speed FC	Endpoint ROI Perfusion	0.00379302	0.674206
72h-24h Average Speed FC	Reperfusion ROI % Baseline	0.0566902	0.0994672
72h-24h Average Speed FC	24h PMN Count	NA	NA
72h-24h Average Speed FC	24h MG/MΦ Count	NA	NA
72h-24h Average Speed FC	72h PMN Count	0.0411824	0.282138
72h-24h Average Speed FC	72h MG/MΦ Count	0.025762	0.453728
72h-24h Average Speed FC	24h MG/MΦ Volume	NA	NA
72h-24h Average Speed FC	24h MG/MΦ Sphericity	NA	NA
72h-24h Average Speed FC	24h MG/MΦ Distance to PMN	NA	NA
72h-24h Average Speed FC	24h PMN Volume	NA	NA
72h-24h Average Speed FC	24h PMN Sphericity	NA	NA
72h-24h Average Speed FC	24h PMN Distance to Vessel	NA	NA
72h-24h Average Speed FC	24h % Intravascular PMNs	NA	NA
72h-24h Average Speed FC	72h MG/MΦ Volume	0.0200575	0.499494
72h-24h Average Speed FC	72h MG/MΦ Sphericity	0.0125247	0.594312
72h-24h Average Speed FC	72h MG/MΦ Distance to PMN	0.00722697	0.692877
72h-24h Average Speed FC	72h PMN Volume	0.00114644	0.875194
72h-24h Average Speed FC	72h PMN Sphericity	0.0115847	0.616654
72h-24h Average Speed FC	72h PMN Distance to Vessel	0.0178885	0.574006
72h-24h Average Speed FC	72h % Intravascular PMNs	0.0491672	0.347446
72h-24h % Time Moving FC	72h-24h % Time Moving FC	1	0
72h-24h % Time Moving FC	72h-24h Border-Center Transitions FC	0.809397	1.25169e-19
72h-24h % Time Moving FC	72h-24h Delta Laterality	0.00518807	0.597819
72h-24h % Time Moving FC	Baseline % Red Pixels	0.00477493	0.663686
72h-24h % Time Moving FC	Ischemia % Red Pixels	0.0053983	0.643783
72h-24h % Time Moving FC	Reperfusion % Red Pixels	0.000127038	0.943523
72h-24h % Time Moving FC	Endpoint % Red Pixels	0.0218789	0.349877
72h-24h % Time Moving FC	Baseline % Yellow Pixels	0.0305293	0.268414
72h-24h % Time Moving FC	Ischemia % Yellow Pixels	0.0281096	0.288554
72h-24h % Time Moving FC	Reperfusion % Yellow Pixels	0.00273991	0.741992
72h-24h % Time Moving FC	Endpoint % Yellow Pixels	0.0274424	0.294432
72h-24h % Time Moving FC	Baseline % Green Pixels	0.00593468	0.62774
72h-24h % Time Moving FC	Ischemia % Green Pixels	0.015747	0.428452
72h-24h % Time Moving FC	Reperfusion % Green Pixels	0.00206177	0.775234
72h-24h % Time Moving FC	Endpoint % Green Pixels	0.0213535	0.355793
72h-24h % Time Moving FC	Baseline % Cyan Pixels	0.000555419	0.882228
72h-24h % Time Moving FC	Ischemia % Cyan Pixels	0.0465891	0.169794
72h-24h % Time Moving FC	Reperfusion % Cyan Pixels	0.00491736	0.659007
72h-24h % Time Moving FC	Endpoint % Cyan Pixels	0.00206853	0.774875
72h-24h % Time Moving FC	Baseline % Blue Pixels	0.0032476	0.719993
72h-24h % Time Moving FC	Ischemia % Blue Pixels	0.120771	0.024132
72h-24h % Time Moving FC	Reperfusion % Blue Pixels	0.00177423	0.791118
72h-24h % Time Moving FC	Endpoint % Blue Pixels	0.00202234	0.777338
72h-24h % Time Moving FC	Baseline Speckle Score	5.24078e-06	0.98852
72h-24h % Time Moving FC	Ischemia Speckle Score	0.0322841	0.25487
72h-24h % Time Moving FC	Reperfusion Speckle Score	0.000864761	0.853334
72h-24h % Time Moving FC	Endpoint Speckle Score	0.0168109	0.413142
72h-24h % Time Moving FC	Baseline ROI Perfusion	0.0212466	0.357014
72h-24h % Time Moving FC	Ischemia ROI Perfusion	0.00396753	0.691894
72h-24h % Time Moving FC	Reperfusion ROI Perfusion	0.000161787	0.936279
72h-24h % Time Moving FC	Endpoint ROI Perfusion	0.00351075	0.709347
72h-24h % Time Moving FC	Reperfusion ROI % Baseline	0.00118317	0.828788
72h-24h % Time Moving FC	24h PMN Count	NA	NA
72h-24h % Time Moving FC	24h MG/MΦ Count	NA	NA
72h-24h % Time Moving FC	72h PMN Count	0.00148789	0.857979
72h-24h % Time Moving FC	72h MG/MΦ Count	0.0169491	0.595264
72h-24h % Time Moving FC	24h MG/MΦ Volume	NA	NA
72h-24h % Time Moving FC	24h MG/MΦ Sphericity	NA	NA
72h-24h % Time Moving FC	24h MG/MΦ Distance to PMN	NA	NA
72h-24h % Time Moving FC	24h PMN Volume	NA	NA
72h-24h % Time Moving FC	24h PMN Sphericity	NA	NA
72h-24h % Time Moving FC	24h PMN Distance to Vessel	NA	NA
72h-24h % Time Moving FC	24h % Intravascular PMNs	NA	NA
72h-24h % Time Moving FC	72h MG/MΦ Volume	0.0758705	0.25371
72h-24h % Time Moving FC	72h MG/MΦ Sphericity	0.00603404	0.751937
72h-24h % Time Moving FC	72h MG/MΦ Distance to PMN	3.8616e-05	0.980476
72h-24h % Time Moving FC	72h PMN Volume	0.0860945	0.237311
72h-24h % Time Moving FC	72h PMN Sphericity	0.200031	0.062749
72h-24h % Time Moving FC	72h PMN Distance to Vessel	0.484465	0.00569426
72h-24h % Time Moving FC	72h % Intravascular PMNs	0.0386976	0.500275
72h-24h Border-Center Transitions FC	72h-24h Border-Center Transitions FC	1	0
72h-24h Border-Center Transitions FC	72h-24h Delta Laterality	0.000422444	0.880485
72h-24h Border-Center Transitions FC	Baseline % Red Pixels	0.0114098	0.517489
72h-24h Border-Center Transitions FC	Ischemia % Red Pixels	0.00162001	0.80779
72h-24h Border-Center Transitions FC	Reperfusion % Red Pixels	0.00522536	0.661883
72h-24h Border-Center Transitions FC	Endpoint % Red Pixels	0.0272399	0.31534
72h-24h Border-Center Transitions FC	Baseline % Yellow Pixels	0.076466	0.0883586
72h-24h Border-Center Transitions FC	Ischemia % Yellow Pixels	0.0222903	0.364334
72h-24h Border-Center Transitions FC	Reperfusion % Yellow Pixels	0.00018599	0.934328
72h-24h Border-Center Transitions FC	Endpoint % Yellow Pixels	0.0508421	0.167535
72h-24h Border-Center Transitions FC	Baseline % Green Pixels	0.0107453	0.530012
72h-24h Border-Center Transitions FC	Ischemia % Green Pixels	0.0225278	0.361762
72h-24h Border-Center Transitions FC	Reperfusion % Green Pixels	0.0108206	0.528566
72h-24h Border-Center Transitions FC	Endpoint % Green Pixels	0.0235545	0.350919
72h-24h Border-Center Transitions FC	Baseline % Cyan Pixels	0.00556764	0.651665
72h-24h Border-Center Transitions FC	Ischemia % Cyan Pixels	0.0378808	0.235104
72h-24h Border-Center Transitions FC	Reperfusion % Cyan Pixels	0.0268146	0.319201
72h-24h Border-Center Transitions FC	Endpoint % Cyan Pixels	0.000168478	0.93749
72h-24h Border-Center Transitions FC	Baseline % Blue Pixels	0.00601959	0.638734
72h-24h Border-Center Transitions FC	Ischemia % Blue Pixels	0.112343	0.0369939
72h-24h Border-Center Transitions FC	Reperfusion % Blue Pixels	0.025996	0.326803
72h-24h Border-Center Transitions FC	Endpoint % Blue Pixels	3.35813e-05	0.97207
72h-24h Border-Center Transitions FC	Baseline Speckle Score	2.52947e-05	0.975759
72h-24h Border-Center Transitions FC	Ischemia Speckle Score	0.02162	0.371728
72h-24h Border-Center Transitions FC	Reperfusion Speckle Score	0.00975931	0.549618
72h-24h Border-Center Transitions FC	Endpoint Speckle Score	0.0172902	0.424913
72h-24h Border-Center Transitions FC	Baseline ROI Perfusion	0.00203609	0.785035
72h-24h Border-Center Transitions FC	Ischemia ROI Perfusion	0.00677622	0.618346
72h-24h Border-Center Transitions FC	Reperfusion ROI Perfusion	0.0113255	0.519048
72h-24h Border-Center Transitions FC	Endpoint ROI Perfusion	0.00267923	0.754325
72h-24h Border-Center Transitions FC	Reperfusion ROI % Baseline	0.00212223	0.780644
72h-24h Border-Center Transitions FC	24h PMN Count	NA	NA
72h-24h Border-Center Transitions FC	24h MG/MΦ Count	NA	NA
72h-24h Border-Center Transitions FC	72h PMN Count	0.00381792	0.779421
72h-24h Border-Center Transitions FC	72h MG/MΦ Count	0.00368393	0.805039
72h-24h Border-Center Transitions FC	24h MG/MΦ Volume	NA	NA
72h-24h Border-Center Transitions FC	24h MG/MΦ Sphericity	NA	NA
72h-24h Border-Center Transitions FC	24h MG/MΦ Distance to PMN	NA	NA
72h-24h Border-Center Transitions FC	24h PMN Volume	NA	NA
72h-24h Border-Center Transitions FC	24h PMN Sphericity	NA	NA
72h-24h Border-Center Transitions FC	24h PMN Distance to Vessel	NA	NA
72h-24h Border-Center Transitions FC	24h % Intravascular PMNs	NA	NA
72h-24h Border-Center Transitions FC	72h MG/MΦ Volume	0.0941089	0.201433
72h-24h Border-Center Transitions FC	72h MG/MΦ Sphericity	0.00318168	0.818589
72h-24h Border-Center Transitions FC	72h MG/MΦ Distance to PMN	0.00332009	0.820346
72h-24h Border-Center Transitions FC	72h PMN Volume	0.0968573	0.208716
72h-24h Border-Center Transitions FC	72h PMN Sphericity	0.22956	0.044244
72h-24h Border-Center Transitions FC	72h PMN Distance to Vessel	0.645431	0.000538019
72h-24h Border-Center Transitions FC	72h % Intravascular PMNs	0.076474	0.338522
72h-24h Delta Laterality	72h-24h Delta Laterality	1	0
72h-24h Delta Laterality	Baseline % Red Pixels	0.00624236	0.581559
72h-24h Delta Laterality	Ischemia % Red Pixels	0.0939717	0.0286775
72h-24h Delta Laterality	Reperfusion % Red Pixels	0.0345025	0.191888
72h-24h Delta Laterality	Endpoint % Red Pixels	0.0775786	0.0478
72h-24h Delta Laterality	Baseline % Yellow Pixels	0.0020428	0.752813
72h-24h Delta Laterality	Ischemia % Yellow Pixels	0.000980558	0.827324
72h-24h Delta Laterality	Reperfusion % Yellow Pixels	0.0300067	0.224131
72h-24h Delta Laterality	Endpoint % Yellow Pixels	0.0888476	0.0336325
72h-24h Delta Laterality	Baseline % Green Pixels	0.00053778	0.871679
72h-24h Delta Laterality	Ischemia % Green Pixels	0.0774112	0.0480509
72h-24h Delta Laterality	Reperfusion % Green Pixels	0.031233	0.214754
72h-24h Delta Laterality	Endpoint % Green Pixels	0.0675545	0.0654858
72h-24h Delta Laterality	Baseline % Cyan Pixels	8.97582e-05	0.947392
72h-24h Delta Laterality	Ischemia % Cyan Pixels	0.075705	0.0506873
72h-24h Delta Laterality	Reperfusion % Cyan Pixels	0.0204602	0.316663
72h-24h Delta Laterality	Endpoint % Cyan Pixels	0.021251	0.30739
72h-24h Delta Laterality	Baseline % Blue Pixels	0.0145819	0.398623
72h-24h Delta Laterality	Ischemia % Blue Pixels	0.0284601	0.236649
72h-24h Delta Laterality	Reperfusion % Blue Pixels	0.0232766	0.285158
72h-24h Delta Laterality	Endpoint % Blue Pixels	0.0241053	0.276642
72h-24h Delta Laterality	Baseline Speckle Score	0.00887388	0.510848
72h-24h Delta Laterality	Ischemia Speckle Score	0.0849476	0.0379761
72h-24h Delta Laterality	Reperfusion Speckle Score	0.0338512	0.196211
72h-24h Delta Laterality	Endpoint Speckle Score	0.0656793	0.069481
72h-24h Delta Laterality	Baseline ROI Perfusion	0.000932898	0.83151
72h-24h Delta Laterality	Ischemia ROI Perfusion	0.0891948	0.0332711
72h-24h Delta Laterality	Reperfusion ROI Perfusion	0.0150482	0.391128
72h-24h Delta Laterality	Endpoint ROI Perfusion	0.0512198	0.110274
72h-24h Delta Laterality	Reperfusion ROI % Baseline	0.0212241	0.3077
72h-24h Delta Laterality	24h PMN Count	NA	NA
72h-24h Delta Laterality	24h MG/MΦ Count	NA	NA
72h-24h Delta Laterality	72h PMN Count	3.63265e-05	0.974329
72h-24h Delta Laterality	72h MG/MΦ Count	0.0147803	0.562653
72h-24h Delta Laterality	24h MG/MΦ Volume	NA	NA
72h-24h Delta Laterality	24h MG/MΦ Sphericity	NA	NA
72h-24h Delta Laterality	24h MG/MΦ Distance to PMN	NA	NA
72h-24h Delta Laterality	24h PMN Volume	NA	NA
72h-24h Delta Laterality	24h PMN Sphericity	NA	NA
72h-24h Delta Laterality	24h PMN Distance to Vessel	NA	NA
72h-24h Delta Laterality	24h % Intravascular PMNs	NA	NA
72h-24h Delta Laterality	72h MG/MΦ Volume	3.22309e-05	0.978041
72h-24h Delta Laterality	72h MG/MΦ Sphericity	0.00174573	0.839403
72h-24h Delta Laterality	72h MG/MΦ Distance to PMN	0.000255424	0.93956
72h-24h Delta Laterality	72h PMN Volume	0.00349171	0.779038
72h-24h Delta Laterality	72h PMN Sphericity	0.0441801	0.313228
72h-24h Delta Laterality	72h PMN Distance to Vessel	0.00662357	0.725814
72h-24h Delta Laterality	72h % Intravascular PMNs	0.00661555	0.725973
Baseline % Red Pixels	Baseline % Red Pixels	1	0
Baseline % Red Pixels	Ischemia % Red Pixels	0.000255085	0.879227
Baseline % Red Pixels	Reperfusion % Red Pixels	0.000383235	0.852247
Baseline % Red Pixels	Endpoint % Red Pixels	0.00274465	0.621876
Baseline % Red Pixels	Baseline % Yellow Pixels	0.531251	1.20878e-16
Baseline % Red Pixels	Ischemia % Yellow Pixels	0.00531662	0.487316
Baseline % Red Pixels	Reperfusion % Yellow Pixels	0.00206345	0.665478
Baseline % Red Pixels	Endpoint % Yellow Pixels	0.00350991	0.576958
Baseline % Red Pixels	Baseline % Green Pixels	0.831637	5.68325e-37
Baseline % Red Pixels	Ischemia % Green Pixels	0.000524577	0.827495
Baseline % Red Pixels	Reperfusion % Green Pixels	0.000408437	0.847523
Baseline % Red Pixels	Endpoint % Green Pixels	0.00590138	0.469213
Baseline % Red Pixels	Baseline % Cyan Pixels	0.61053	2.46602e-20
Baseline % Red Pixels	Ischemia % Cyan Pixels	0.000298327	0.869474
Baseline % Red Pixels	Reperfusion % Cyan Pixels	0.0111078	0.314686
Baseline % Red Pixels	Endpoint % Cyan Pixels	0.00103792	0.761769
Baseline % Red Pixels	Baseline % Blue Pixels	0.612306	2.0003e-20
Baseline % Red Pixels	Ischemia % Blue Pixels	0.00273685	0.618467
Baseline % Red Pixels	Reperfusion % Blue Pixels	0.0950677	0.00263981
Baseline % Red Pixels	Endpoint % Blue Pixels	0.0117755	0.30589
Baseline % Red Pixels	Baseline Speckle Score	0.881131	7.30551e-44
Baseline % Red Pixels	Ischemia Speckle Score	0.000269119	0.875975
Baseline % Red Pixels	Reperfusion Speckle Score	0.00342378	0.577442
Baseline % Red Pixels	Endpoint Speckle Score	0.000938875	0.773099
Baseline % Red Pixels	Baseline ROI Perfusion	0.0011325	0.752851
Baseline % Red Pixels	Ischemia ROI Perfusion	0.0539363	0.0276192
Baseline % Red Pixels	Reperfusion ROI Perfusion	0.0508788	0.0325493
Baseline % Red Pixels	Endpoint ROI Perfusion	0.02297	0.153878
Baseline % Red Pixels	Reperfusion ROI % Baseline	0.0497875	0.0345198
Baseline % Red Pixels	24h PMN Count	0.0891083	0.244499
Baseline % Red Pixels	24h MG/MΦ Count	0.150505	0.190245
Baseline % Red Pixels	72h PMN Count	0.0398955	0.281347
Baseline % Red Pixels	72h MG/MΦ Count	0.104367	0.132688
Baseline % Red Pixels	24h MG/MΦ Volume	0.0470878	0.476393
Baseline % Red Pixels	24h MG/MΦ Sphericity	0.00484616	0.821217
Baseline % Red Pixels	24h MG/MΦ Distance to PMN	0.00589689	0.8125
Baseline % Red Pixels	24h PMN Volume	0.0666149	0.417974
Baseline % Red Pixels	24h PMN Sphericity	0.127128	0.255271
Baseline % Red Pixels	24h PMN Distance to Vessel	0.0140907	0.728127
Baseline % Red Pixels	24h % Intravascular PMNs	0.115879	0.305669
Baseline % Red Pixels	72h MG/MΦ Volume	0.184523	0.0361818
Baseline % Red Pixels	72h MG/MΦ Sphericity	0.0121665	0.607888
Baseline % Red Pixels	72h MG/MΦ Distance to PMN	0.0161954	0.562827
Baseline % Red Pixels	72h PMN Volume	0.215584	0.0256176
Baseline % Red Pixels	72h PMN Sphericity	0.021894	0.500456
Baseline % Red Pixels	72h PMN Distance to Vessel	0.0234278	0.531585
Baseline % Red Pixels	72h % Intravascular PMNs	0.0220814	0.54376
Ischemia % Red Pixels	Ischemia % Red Pixels	1	0
Ischemia % Red Pixels	Reperfusion % Red Pixels	0.0764854	0.00728494
Ischemia % Red Pixels	Endpoint % Red Pixels	0.128741	0.000478482
Ischemia % Red Pixels	Baseline % Yellow Pixels	0.0163538	0.221862
Ischemia % Red Pixels	Ischemia % Yellow Pixels	0.00587347	0.465296
Ischemia % Red Pixels	Reperfusion % Yellow Pixels	0.0312667	0.0899702
Ischemia % Red Pixels	Endpoint % Yellow Pixels	0.0984573	0.00245553
Ischemia % Red Pixels	Baseline % Green Pixels	0.00354831	0.570588
Ischemia % Red Pixels	Ischemia % Green Pixels	0.787002	2.58869e-32
Ischemia % Red Pixels	Reperfusion % Green Pixels	0.0929494	0.00296409
Ischemia % Red Pixels	Endpoint % Green Pixels	0.110486	0.00128611
Ischemia % Red Pixels	Baseline % Cyan Pixels	0.015638	0.232344
Ischemia % Red Pixels	Ischemia % Cyan Pixels	0.692445	5.00562e-25
Ischemia % Red Pixels	Reperfusion % Cyan Pixels	0.075696	0.00760587
Ischemia % Red Pixels	Endpoint % Cyan Pixels	0.083493	0.00547225
Ischemia % Red Pixels	Baseline % Blue Pixels	0.0304093	0.0945682
Ischemia % Red Pixels	Ischemia % Blue Pixels	0.429101	1.05287e-12
Ischemia % Red Pixels	Reperfusion % Blue Pixels	0.0841631	0.00479035
Ischemia % Red Pixels	Endpoint % Blue Pixels	0.0786184	0.00710251
Ischemia % Red Pixels	Baseline Speckle Score	0.00982072	0.344615
Ischemia % Red Pixels	Ischemia Speckle Score	0.911479	1.07547e-49
Ischemia % Red Pixels	Reperfusion Speckle Score	0.090678	0.00335596
Ischemia % Red Pixels	Endpoint Speckle Score	0.123093	0.000650438
Ischemia % Red Pixels	Baseline ROI Perfusion	0.00294099	0.61169
Ischemia % Red Pixels	Ischemia ROI Perfusion	0.169401	5.57322e-05
Ischemia % Red Pixels	Reperfusion ROI Perfusion	0.00226465	0.656027
Ischemia % Red Pixels	Endpoint ROI Perfusion	0.00460487	0.5251
Ischemia % Red Pixels	Reperfusion ROI % Baseline	0.0576016	0.0226995
Ischemia % Red Pixels	24h PMN Count	0.117588	0.177834
Ischemia % Red Pixels	24h MG/MΦ Count	0.0608845	0.416389
Ischemia % Red Pixels	72h PMN Count	0.00819811	0.628099
Ischemia % Red Pixels	72h MG/MΦ Count	0.00277906	0.811193
Ischemia % Red Pixels	24h MG/MΦ Volume	0.0396546	0.514254
Ischemia % Red Pixels	24h MG/MΦ Sphericity	0.0751704	0.364681
Ischemia % Red Pixels	24h MG/MΦ Distance to PMN	0.0681225	0.412567
Ischemia % Red Pixels	24h PMN Volume	0.041612	0.524823
Ischemia % Red Pixels	24h PMN Sphericity	0.0216438	0.648198
Ischemia % Red Pixels	24h PMN Distance to Vessel	0.0434276	0.538611
Ischemia % Red Pixels	24h % Intravascular PMNs	0.250259	0.117087
Ischemia % Red Pixels	72h MG/MΦ Volume	0.00173351	0.846829
Ischemia % Red Pixels	72h MG/MΦ Sphericity	0.00477986	0.748209
Ischemia % Red Pixels	72h MG/MΦ Distance to PMN	0.00690489	0.706217
Ischemia % Red Pixels	72h PMN Volume	0.0129438	0.605239
Ischemia % Red Pixels	72h PMN Sphericity	0.0422412	0.346807
Ischemia % Red Pixels	72h PMN Distance to Vessel	0.00949366	0.691497
Ischemia % Red Pixels	72h % Intravascular PMNs	0.00653849	0.742099
Reperfusion % Red Pixels	Reperfusion % Red Pixels	1	0
Reperfusion % Red Pixels	Endpoint % Red Pixels	0.378857	8.43943e-11
Reperfusion % Red Pixels	Baseline % Yellow Pixels	0.041337	0.0506245
Reperfusion % Red Pixels	Ischemia % Yellow Pixels	0.000111264	0.920067
Reperfusion % Red Pixels	Reperfusion % Yellow Pixels	0.829299	1.06588e-36
Reperfusion % Red Pixels	Endpoint % Yellow Pixels	0.340874	1.24462e-09
Reperfusion % Red Pixels	Baseline % Green Pixels	0.00254137	0.631309
Reperfusion % Red Pixels	Ischemia % Green Pixels	0.0219371	0.156528
Reperfusion % Red Pixels	Reperfusion % Green Pixels	0.964972	5.00547e-68
Reperfusion % Red Pixels	Endpoint % Green Pixels	0.367837	1.87174e-10
Reperfusion % Red Pixels	Baseline % Cyan Pixels	0.0534757	0.0257318
Reperfusion % Red Pixels	Ischemia % Cyan Pixels	0.0725192	0.00904728
Reperfusion % Red Pixels	Reperfusion % Cyan Pixels	0.558529	7.71155e-18
Reperfusion % Red Pixels	Endpoint % Cyan Pixels	0.138847	0.000275447
Reperfusion % Red Pixels	Baseline % Blue Pixels	0.0531686	0.0261723
Reperfusion % Red Pixels	Ischemia % Blue Pixels	0.0929265	0.0029678
Reperfusion % Red Pixels	Reperfusion % Blue Pixels	0.379219	5.04814e-11
Reperfusion % Red Pixels	Endpoint % Blue Pixels	0.116429	0.000933184
Reperfusion % Red Pixels	Baseline Speckle Score	0.019135	0.18606
Reperfusion % Red Pixels	Ischemia Speckle Score	0.0887146	0.00373603
Reperfusion % Red Pixels	Reperfusion Speckle Score	0.972532	7.83105e-73
Reperfusion % Red Pixels	Endpoint Speckle Score	0.325019	3.66555e-09
Reperfusion % Red Pixels	Baseline ROI Perfusion	0.000297682	0.871775
Reperfusion % Red Pixels	Ischemia ROI Perfusion	0.00174514	0.69584
Reperfusion % Red Pixels	Reperfusion ROI Perfusion	0.224934	2.33365e-06
Reperfusion % Red Pixels	Endpoint ROI Perfusion	0.177677	3.51134e-05
Reperfusion % Red Pixels	Reperfusion ROI % Baseline	0.315714	8.30577e-09
Reperfusion % Red Pixels	24h PMN Count	0.0439444	0.419367
Reperfusion % Red Pixels	24h MG/MΦ Count	0.0678287	0.390128
Reperfusion % Red Pixels	72h PMN Count	0.00906316	0.610449
Reperfusion % Red Pixels	72h MG/MΦ Count	5.91348e-05	0.972221
Reperfusion % Red Pixels	24h MG/MΦ Volume	0.0841334	0.336388
Reperfusion % Red Pixels	24h MG/MΦ Sphericity	0.2389	0.0900924
Reperfusion % Red Pixels	24h MG/MΦ Distance to PMN	0.268027	0.0847059
Reperfusion % Red Pixels	24h PMN Volume	0.00171653	0.898274
Reperfusion % Red Pixels	24h PMN Sphericity	0.144511	0.222864
Reperfusion % Red Pixels	24h PMN Distance to Vessel	0.00879331	0.783903
Reperfusion % Red Pixels	24h % Intravascular PMNs	0.00431371	0.847853
Reperfusion % Red Pixels	72h MG/MΦ Volume	0.0724315	0.203479
Reperfusion % Red Pixels	72h MG/MΦ Sphericity	0.0917403	0.150243
Reperfusion % Red Pixels	72h MG/MΦ Distance to PMN	0.00273107	0.812802
Reperfusion % Red Pixels	72h PMN Volume	0.00820726	0.681006
Reperfusion % Red Pixels	72h PMN Sphericity	0.0787114	0.194737
Reperfusion % Red Pixels	72h PMN Distance to Vessel	0.0144844	0.623586
Reperfusion % Red Pixels	72h % Intravascular PMNs	0.00788928	0.717654
Endpoint % Red Pixels	Endpoint % Red Pixels	1	0
Endpoint % Red Pixels	Baseline % Yellow Pixels	0.036274	0.0705563
Endpoint % Red Pixels	Ischemia % Yellow Pixels	0.0485267	0.0358865
Endpoint % Red Pixels	Reperfusion % Yellow Pixels	0.256897	2.95096e-07
Endpoint % Red Pixels	Endpoint % Yellow Pixels	0.645994	8.89799e-22
Endpoint % Red Pixels	Baseline % Green Pixels	0.00281156	0.617654
Endpoint % Red Pixels	Ischemia % Green Pixels	0.0559538	0.0239802
Endpoint % Red Pixels	Reperfusion % Green Pixels	0.405566	1.1558e-11
Endpoint % Red Pixels	Endpoint % Green Pixels	0.973334	7.70513e-72
Endpoint % Red Pixels	Baseline % Cyan Pixels	0.0184926	0.198693
Endpoint % Red Pixels	Ischemia % Cyan Pixels	0.184729	2.12171e-05
Endpoint % Red Pixels	Reperfusion % Cyan Pixels	0.286022	4.73813e-08
Endpoint % Red Pixels	Endpoint % Cyan Pixels	0.609019	7.61389e-20
Endpoint % Red Pixels	Baseline % Blue Pixels	0.00602307	0.464653
Endpoint % Red Pixels	Ischemia % Blue Pixels	0.14642	0.000181622
Endpoint % Red Pixels	Reperfusion % Blue Pixels	0.130875	0.000425953
Endpoint % Red Pixels	Endpoint % Blue Pixels	0.511214	1.71025e-15
Endpoint % Red Pixels	Baseline Speckle Score	0.000613502	0.815722
Endpoint % Red Pixels	Ischemia Speckle Score	0.166063	6.09476e-05
Endpoint % Red Pixels	Reperfusion Speckle Score	0.385577	5.15795e-11
Endpoint % Red Pixels	Endpoint Speckle Score	0.957964	4.85852e-63
Endpoint % Red Pixels	Baseline ROI Perfusion	0.0110412	0.324306
Endpoint % Red Pixels	Ischemia ROI Perfusion	0.0344355	0.079931
Endpoint % Red Pixels	Reperfusion ROI Perfusion	0.162321	8.25227e-05
Endpoint % Red Pixels	Endpoint ROI Perfusion	0.292546	3.72482e-08
Endpoint % Red Pixels	Reperfusion ROI % Baseline	0.185305	2.28649e-05
Endpoint % Red Pixels	24h PMN Count	0.201888	0.0808101
Endpoint % Red Pixels	24h MG/MΦ Count	0.0135474	0.718674
Endpoint % Red Pixels	72h PMN Count	0.0256531	0.389406
Endpoint % Red Pixels	72h MG/MΦ Count	0.0136962	0.59487
Endpoint % Red Pixels	24h MG/MΦ Volume	0.0187093	0.671645
Endpoint % Red Pixels	24h MG/MΦ Sphericity	0.0692668	0.408526
Endpoint % Red Pixels	24h MG/MΦ Distance to PMN	0.393651	0.0289645
Endpoint % Red Pixels	24h PMN Volume	0.070014	0.405915
Endpoint % Red Pixels	24h PMN Sphericity	0.000990579	0.922648
Endpoint % Red Pixels	24h PMN Distance to Vessel	0.00396938	0.853993
Endpoint % Red Pixels	24h % Intravascular PMNs	0.0243458	0.646857
Endpoint % Red Pixels	72h MG/MΦ Volume	0.0389337	0.355395
Endpoint % Red Pixels	72h MG/MΦ Sphericity	0.0409629	0.342898
Endpoint % Red Pixels	72h MG/MΦ Distance to PMN	0.041927	0.348646
Endpoint % Red Pixels	72h PMN Volume	0.000246684	0.943296
Endpoint % Red Pixels	72h PMN Sphericity	0.00872016	0.671714
Endpoint % Red Pixels	72h PMN Distance to Vessel	0.0901633	0.21164
Endpoint % Red Pixels	72h % Intravascular PMNs	0.00315051	0.819466
Baseline % Yellow Pixels	Baseline % Yellow Pixels	1	0
Baseline % Yellow Pixels	Ischemia % Yellow Pixels	0.00379219	0.557615
Baseline % Yellow Pixels	Reperfusion % Yellow Pixels	0.0294017	0.100296
Baseline % Yellow Pixels	Endpoint % Yellow Pixels	0.0159561	0.232822
Baseline % Yellow Pixels	Baseline % Green Pixels	0.422295	1.81912e-12
Baseline % Yellow Pixels	Ischemia % Green Pixels	0.0188317	0.18962
Baseline % Yellow Pixels	Reperfusion % Green Pixels	0.0440735	0.04341
Baseline % Yellow Pixels	Endpoint % Green Pixels	0.0450455	0.0434127
Baseline % Yellow Pixels	Baseline % Cyan Pixels	0.0345506	0.0744433
Baseline % Yellow Pixels	Ischemia % Cyan Pixels	0.0131837	0.273106
Baseline % Yellow Pixels	Reperfusion % Cyan Pixels	0.0306079	0.0934813
Baseline % Yellow Pixels	Endpoint % Cyan Pixels	0.0242098	0.140819
Baseline % Yellow Pixels	Baseline % Blue Pixels	0.0343147	0.0754581
Baseline % Yellow Pixels	Ischemia % Blue Pixels	0.0048181	0.508526
Baseline % Yellow Pixels	Reperfusion % Blue Pixels	0.0099853	0.340585
Baseline % Yellow Pixels	Endpoint % Blue Pixels	0.00734937	0.419101
Baseline % Yellow Pixels	Baseline Speckle Score	0.207741	4.41171e-06
Baseline % Yellow Pixels	Ischemia Speckle Score	0.0152655	0.238031
Baseline % Yellow Pixels	Reperfusion Speckle Score	0.0410949	0.05132
Baseline % Yellow Pixels	Endpoint Speckle Score	0.0341591	0.0794546
Baseline % Yellow Pixels	Baseline ROI Perfusion	0.00579149	0.475902
Baseline % Yellow Pixels	Ischemia ROI Perfusion	0.0365241	0.0711713
Baseline % Yellow Pixels	Reperfusion ROI Perfusion	0.0978597	0.00268242
Baseline % Yellow Pixels	Endpoint ROI Perfusion	0.0345767	0.0793043
Baseline % Yellow Pixels	Reperfusion ROI % Baseline	0.236985	1.1434e-06
Baseline % Yellow Pixels	24h PMN Count	0.0393518	0.445317
Baseline % Yellow Pixels	24h MG/MΦ Count	0.119268	0.247795
Baseline % Yellow Pixels	72h PMN Count	0.00363303	0.747379
Baseline % Yellow Pixels	72h MG/MΦ Count	0.059046	0.263901
Baseline % Yellow Pixels	24h MG/MΦ Volume	0.0425547	0.498934
Baseline % Yellow Pixels	24h MG/MΦ Sphericity	0.0375944	0.525612
Baseline % Yellow Pixels	24h MG/MΦ Distance to PMN	0.0387311	0.539837
Baseline % Yellow Pixels	24h PMN Volume	0.0634388	0.429687
Baseline % Yellow Pixels	24h PMN Sphericity	0.261341	0.089381
Baseline % Yellow Pixels	24h PMN Distance to Vessel	0.210483	0.155793
Baseline % Yellow Pixels	24h % Intravascular PMNs	0.191868	0.177822
Baseline % Yellow Pixels	72h MG/MΦ Volume	0.137492	0.0744603
Baseline % Yellow Pixels	72h MG/MΦ Sphericity	0.039704	0.350582
Baseline % Yellow Pixels	72h MG/MΦ Distance to PMN	0.000186719	0.950658
Baseline % Yellow Pixels	72h PMN Volume	0.205773	0.0297007
Baseline % Yellow Pixels	72h PMN Sphericity	0.0854716	0.175834
Baseline % Yellow Pixels	72h PMN Distance to Vessel	0.0555975	0.331145
Baseline % Yellow Pixels	72h % Intravascular PMNs	0.0288657	0.486819
Ischemia % Yellow Pixels	Ischemia % Yellow Pixels	1	0
Ischemia % Yellow Pixels	Reperfusion % Yellow Pixels	0.0105214	0.327881
Ischemia % Yellow Pixels	Endpoint % Yellow Pixels	0.0106152	0.331126
Ischemia % Yellow Pixels	Baseline % Green Pixels	8.99129e-05	0.928121
Ischemia % Yellow Pixels	Ischemia % Green Pixels	0.00807182	0.391758
Ischemia % Yellow Pixels	Reperfusion % Green Pixels	0.00438334	0.528346
Ischemia % Yellow Pixels	Endpoint % Green Pixels	0.0547306	0.0256204
Ischemia % Yellow Pixels	Baseline % Cyan Pixels	0.000142492	0.909584
Ischemia % Yellow Pixels	Ischemia % Cyan Pixels	0.290746	2.45587e-08
Ischemia % Yellow Pixels	Reperfusion % Cyan Pixels	0.023439	0.142892
Ischemia % Yellow Pixels	Endpoint % Cyan Pixels	0.0599994	0.0192775
Ischemia % Yellow Pixels	Baseline % Blue Pixels	0.00854371	0.378201
Ischemia % Yellow Pixels	Ischemia % Blue Pixels	0.292783	2.14766e-08
Ischemia % Yellow Pixels	Reperfusion % Blue Pixels	0.00734172	0.414138
Ischemia % Yellow Pixels	Endpoint % Blue Pixels	0.0346106	0.0774604
Ischemia % Yellow Pixels	Baseline Speckle Score	0.00598806	0.460962
Ischemia % Yellow Pixels	Ischemia Speckle Score	0.104798	0.00154885
Ischemia % Yellow Pixels	Reperfusion Speckle Score	0.00224454	0.652021
Ischemia % Yellow Pixels	Endpoint Speckle Score	0.0551984	0.0249799
Ischemia % Yellow Pixels	Baseline ROI Perfusion	0.031808	0.0926037
Ischemia % Yellow Pixels	Ischemia ROI Perfusion	0.213195	4.63358e-06
Ischemia % Yellow Pixels	Reperfusion ROI Perfusion	0.0179789	0.207683
Ischemia % Yellow Pixels	Endpoint ROI Perfusion	0.0849081	0.0053286
Ischemia % Yellow Pixels	Reperfusion ROI % Baseline	0.0348303	0.0781918
Ischemia % Yellow Pixels	24h PMN Count	0.0819579	0.265285
Ischemia % Yellow Pixels	24h MG/MΦ Count	0.0397574	0.513698
Ischemia % Yellow Pixels	72h PMN Count	0.0079679	0.632987
Ischemia % Yellow Pixels	72h MG/MΦ Count	0.00901703	0.666481
Ischemia % Yellow Pixels	24h MG/MΦ Volume	7.63784e-05	0.977394
Ischemia % Yellow Pixels	24h MG/MΦ Sphericity	0.000250578	0.959066
Ischemia % Yellow Pixels	24h MG/MΦ Distance to PMN	0.00819614	0.779622
Ischemia % Yellow Pixels	24h PMN Volume	0.0707295	0.403437
Ischemia % Yellow Pixels	24h PMN Sphericity	0.0465951	0.500434
Ischemia % Yellow Pixels	24h PMN Distance to Vessel	0.0590131	0.471669
Ischemia % Yellow Pixels	24h % Intravascular PMNs	0.0782601	0.404757
Ischemia % Yellow Pixels	72h MG/MΦ Volume	0.0340386	0.388119
Ischemia % Yellow Pixels	72h MG/MΦ Sphericity	0.0144881	0.575317
Ischemia % Yellow Pixels	72h MG/MΦ Distance to PMN	0.0160336	0.5648
Ischemia % Yellow Pixels	72h PMN Volume	0.00632678	0.718275
Ischemia % Yellow Pixels	72h PMN Sphericity	0.000182726	0.951188
Ischemia % Yellow Pixels	72h PMN Distance to Vessel	0.00227176	0.846362
Ischemia % Yellow Pixels	72h % Intravascular PMNs	0.0447292	0.384747
Reperfusion % Yellow Pixels	Reperfusion % Yellow Pixels	1	0
Reperfusion % Yellow Pixels	Endpoint % Yellow Pixels	0.360629	3.12902e-10
Reperfusion % Yellow Pixels	Baseline % Green Pixels	0.0156804	0.231707
Reperfusion % Yellow Pixels	Ischemia % Green Pixels	0.0133602	0.269896
Reperfusion % Yellow Pixels	Reperfusion % Green Pixels	0.683373	1.89086e-24
Reperfusion % Yellow Pixels	Endpoint % Green Pixels	0.222334	2.38487e-06
Reperfusion % Yellow Pixels	Baseline % Cyan Pixels	0.0121581	0.292718
Reperfusion % Yellow Pixels	Ischemia % Cyan Pixels	0.0193641	0.183421
Reperfusion % Yellow Pixels	Reperfusion % Cyan Pixels	0.190568	1.21736e-05
Reperfusion % Yellow Pixels	Endpoint % Cyan Pixels	0.0525567	0.0288231
[truncated: 851 more rows]
