# Supplementary material for: Ischemic Duration is More Critical than Reperfusion Efficacy in Driving Early Neuroinflammation and Motor Deficits after Transient Middle Cerebral Artery Occlusion
Source: Research Square preprint supplement (doi:10.21203/rs.3.rs-8712806/v1), 2026-02-09
Supplement: Supplementary file 2 [file e4babcd436b7986cd4c55db0.xlsx]

## Sheet: Sheet1
Figure 1E
Two-Way Anova (Infarct Volume)	P Val	Symbol	DF	F (DFn, DFd)
Interaction	0.1094	NS	2	F (2, 36) = 2.355
Ischemic Duration	0.0005	***	2	F (2, 36) = 9.545
Reperfusion	0.1263	NS	1	F (1, 36) = 2.450
Tukey's Mulitple Comparison	Diff	CI	Adj P Val	Symbol
30m
Longa vs. Koizumi	-13.32	-34.15 to 7.503	NS	0.2027
60m
Longa vs. Koizumi	8.105	-12.72 to 28.93	NS	0.4351
90m
Longa vs. Koizumi	-22.62	-43.44 to -1.796	*	0.0341
Longa
30m vs. 60m	-36.08	-61.18 to -10.98	**	0.0034
30m vs. 90m	-24.53	-49.63 to 0.5668	NS	0.0565
60m vs. 90m	11.55	-13.55 to 36.65	NS	0.5053
Koizumi
30m vs. 60m	-14.65	-39.75 to 10.44	NS	0.3379
30m vs. 90m	-33.83	-58.93 to -8.731	**	0.0061
60m vs. 90m	-19.17	-44.27 to 5.923	NS	0.1628
Figure 1F
Two-Way Anova (Hemorrhage Frequency)	P Val	Symbol	DF	F (DFn, DFd)
Interaction	0.6673	NS	2	F (2, 36) = 0.4091
Ischemic Duration	0.0034	**	2	F (2, 36) = 6.682
Reperfusion	0.2753	NS	2	F (1, 36) = 1.227
Tukey's Mulitple Comparison	Diff	CI	Adj P Val	Symbol
30m
Longa vs. Koizumi	0	-0.4530 to 0.4530	NS	>0.9999
60m
Longa vs. Koizumi	0.1429	-0.3101 to 0.5958	NS	0.5265
90m
Longa vs. Koizumi	0.2857	-0.1673 to 0.7387	NS	0.209
Longa
30m vs. 60m	-0.4286	-0.9745 to 0.1174	NS	0.148
30m vs. 90m	-0.7143	-1.260 to -0.1683	**	0.0079
60m vs. 90m	-0.2857	-0.8317 to 0.2602	NS	0.4159
Koizumi
30m vs. 60m	-0.2857	-0.8317 to 0.2602	NS	0.4159
30m vs. 90m	-0.4286	-0.9745 to 0.1174	NS	0.148
60m vs. 90m	-0.1429	-0.6888 to 0.4031	NS	0.7994
Figure 1G
Two-Way Anova (Hemorrhage Volume)	P Val	Symbol	DF	F (DFn, DFd)
Interaction	0.1952	NS	2	F (2, 36) = 1.710
Ischemic Duration	0.1092	NS	2	F (2, 36) = 2.356
Reperfusion	0.3729	NS	1	F (1, 36) = 0.8143
Tukey's Mulitple Comparison	Diff	CI	Adj P Val	Symbol
30m
Longa vs. Koizumi	0	-0.4508 to 0.4508	>0.9999	NS
60m
Longa vs. Koizumi	0.4466	-0.004248 to 0.8974	0.0521	NS
90m
Longa vs. Koizumi	-0.09914	-0.5500 to 0.3517	0.6583	NS
Longa
30m vs. 60m	-0.5533	-1.097 to -0.009950	0.0452	*
30m vs. 90m	-0.1906	-0.7339 to 0.3528	0.6703	NS
60m vs. 90m	0.3627	-0.1806 to 0.9060	0.2456	NS
Koizumi
30m vs. 60m	-0.1067	-0.6500 to 0.4366	0.8811	NS
30m vs. 90m	-0.2897	-0.8330 to 0.2536	0.4026	NS
60m vs. 90m	-0.183	-0.7263 to 0.3603	0.6912	NS
Figure 1H
Two-Way Anova (Intraischemic Behavior Score)	P Val	Symbol	DF	F (DFn, DFd)
Interaction	0.0701	NS	2	F (2, 286) = 2.682
Ischemic Duration	0.0329	*	2	F (2, 286) = 3.457
Reperfusion	0.2877	NS	1	F (1, 286) = 1.135
Tukey's Mulitple Comparison	Diff	CI	Adj P Val	Symbol
30m
Longa vs. Koizumi	0.01058	-0.2133 to 0.2345	0.926	NS
60m
Longa vs. Koizumi	0.05479	-0.1447 to 0.2543	0.5891	NS
90m
Longa vs. Koizumi	-0.2626	-0.4698 to -0.05546	0.0131	*
Longa
30m vs. 60m	-0.09827	-0.3267 to 0.1302	0.569	NS
30m vs. 90m	-0.06348	-0.3114 to 0.1845	0.8185	NS
60m vs. 90m	0.03479	-0.1880 to 0.2576	0.9281	NS
Koizumi
30m vs. 60m	-0.05405	-0.3309 to 0.2228	0.89	NS
30m vs. 90m	-0.3367	-0.6047 to -0.06866	0.0093	**
60m vs. 90m	-0.2826	-0.5450 to -0.02023	0.0313	*
Figure 1I
Log-rank (Mantel-Cox) test	Chi Square	DF	P Val	Symbol
Survival	1.298	5	0.9351	NS
Figure 2B (Ischemia)
Two-Way Anova (Perfusion)	P Val	Symbol	DF	F (DFn, DFd)
Interaction	0.4256	NS	2	F (2, 84) = 0.8629
Ischemic Duration	0.4482	NS	2	F (2, 84) = 0.8103
Reperfusion	0.8871	NS	1	F (1, 84) = 0.02030
Tukey's Mulitple Comparison	Diff	CI	Adj P Val	Symbol
30m
Longa vs. Koizumi	-0.02938	-0.1053 to 0.04657	0.4439	NS
60m
Longa vs. Koizumi	-0.01727	-0.09321 to 0.05868	0.6524	NS
90m
Longa vs. Koizumi	0.03722	-0.03872 to 0.1132	0.3325	NS
Longa
30m vs. 60m	-0.0002097	-0.09133 to 0.09091	>0.9999	NS
30m vs. 90m	-0.05971	-0.1508 to 0.03141	0.2671	NS
60m vs. 90m	-0.0595	-0.1506 to 0.03161	0.2695	NS
Koizumi
30m vs. 60m	0.0119	-0.07921 to 0.1030	0.9479	NS
30m vs. 90m	0.006886	-0.08423 to 0.09800	0.9822	NS
60m vs. 90m	-0.005018	-0.09614 to 0.08610	0.9905	NS
Figure 2B (Reperfusion)
Two-Way Anova (Perfusion)	P Val	Symbol	DF	F (DFn, DFd)
Interaction	0.6657	NS	2	F (2, 84) = 0.4088
Ischemic Duration	0.9909	NS	2	F (2, 84) = 0.009152
Reperfusion	<0.0001	****	1	F (1, 84) = 42.27
Tukey's Mulitple Comparison	Diff	CI	Adj P Val	Symbol
30m
Longa vs. Koizumi	0.1325	0.04832 to 0.2168	0.0024	**
60m
Longa vs. Koizumi	0.1867	0.1024 to 0.2709	<0.0001	****
90m
Longa vs. Koizumi	0.1577	0.07350 to 0.2420	0.0004	***
Longa
30m vs. 60m	-0.03075	-0.1318 to 0.07030	0.7487	NS
30m vs. 90m	-0.01588	-0.1169 to 0.08518	0.9255	NS
60m vs. 90m	0.01488	-0.08618 to 0.1159	0.9343	NS
Koizumi
30m vs. 60m	0.02337	-0.07769 to 0.1244	0.8459	NS
30m vs. 90m	0.0093	-0.09176 to 0.1104	0.9738	NS
60m vs. 90m	-0.01407	-0.1151 to 0.08699	0.9411	NS
Figure 2B (Endpoint)
Two-Way Anova (Perfusion)	P Val	Symbol	DF	F (DFn, DFd)
Interaction	0.6771	NS	2	F (2, 84) = 0.3917
Ischemic Duration	0.8882	NS	2	F (2, 84) = 0.1187
Reperfusion	<0.0001	****	1	F (1, 84) = 30.00
Tukey's Mulitple Comparison	Diff	CI	Adj P Val	Symbol
30m
Longa vs. Koizumi	0.1276	0.02425 to 0.2310	0.0161	*
60m
Longa vs. Koizumi	0.1894	0.08605 to 0.2928	0.0005	***
90m
Longa vs. Koizumi	0.1761	0.07275 to 0.2795	0.0011	**
Longa
30m vs. 60m	-0.01543	-0.1394 to 0.1086	0.9526	NS
30m vs. 90m	-0.02433	-0.1483 to 0.09968	0.8864	NS
60m vs. 90m	-0.008899	-0.1329 to 0.1151	0.984	NS
Koizumi
30m vs. 60m	0.04637	-0.07764 to 0.1704	0.6467	NS
30m vs. 90m	0.02417	-0.09983 to 0.1482	0.8878	NS
60m vs. 90m	-0.0222	-0.1462 to 0.1018	0.9045	NS
Figure 2C (Ischemia - Red)
Two-Way Anova (% Pixels)	P Val	Symbol	DF	F (DFn, DFd)
Interaction	0.1898	NS	2	F (2, 84) = 1.695
Ischemic Duration	0.1742	NS	2	F (2, 84) = 1.784
Reperfusion	0.065	NS	1	F (1, 84) = 3.496
Tukey's Mulitple Comparison	Diff	CI	Adj P Val	Symbol
30m
Longa vs. Koizumi	-0.02613	-0.1226 to 0.07038	0.5917	NS
60m
Longa vs. Koizumi	-0.1245	-0.2210 to -0.02796	0.0121	*
90m
Longa vs. Koizumi	-0.006573	-0.1031 to 0.08994	0.8926	NS
Longa
30m vs. 60m	0.00824	-0.1076 to 0.1240	0.9842	NS
30m vs. 90m	-0.07378	-0.1896 to 0.04201	0.2867	NS
60m vs. 90m	-0.08202	-0.1978 to 0.03377	0.215	NS
Koizumi
30m vs. 60m	-0.0901	-0.2059 to 0.02570	0.1579	NS
30m vs. 90m	-0.05422	-0.1700 to 0.06157	0.5062	NS
60m vs. 90m	0.03587	-0.07992 to 0.1517	0.7409	NS
Figure 2C (Ischemia - Yellow)
Two-Way Anova (% Pixels)	P Val	Symbol	DF	F (DFn, DFd)
Interaction	0.1283	NS	2	F (2, 84) = 2.104
Ischemic Duration	0.8279	NS	2	F (2, 84) = 0.1893
Reperfusion	0.9396	NS	1	F (1, 84) = 0.005785
Tukey's Mulitple Comparison	Diff	CI	Adj P Val	Symbol
30m
Longa vs. Koizumi	-0.01425	-0.03700 to 0.008502	0.2164	NS
60m
Longa vs. Koizumi	-0.005192	-0.02794 to 0.01756	0.6511	NS
90m
Longa vs. Koizumi	0.01793	-0.004817 to 0.04068	0.1208	NS
Longa
30m vs. 60m	-0.005454	-0.03275 to 0.02184	0.8824	NS
30m vs. 90m	-0.02079	-0.04808 to 0.006506	0.1702	NS
60m vs. 90m	-0.01533	-0.04263 to 0.01196	0.377	NS
Koizumi
30m vs. 60m	0.003602	-0.02369 to 0.03090	0.9469	NS
30m vs. 90m	0.01139	-0.01590 to 0.03869	0.5816	NS
60m vs. 90m	0.007789	-0.01951 to 0.03508	0.7752	NS
Figure 2C (Ischemia - Green)
Two-Way Anova (% Pixels)	P Val	Symbol	DF	F (DFn, DFd)
Interaction	0.2015	NS	2	F (2, 84) = 1.633
Ischemic Duration	0.2537	NS	2	F (2, 84) = 1.394
Reperfusion	0.0788	NS	1	F (1, 84) = 3.167
Tukey's Mulitple Comparison	Diff	CI	Adj P Val	Symbol
30m
Longa vs. Koizumi	-0.004954	-0.06183 to 0.05192	0.8629	NS
60m
Longa vs. Koizumi	0.0678	0.01093 to 0.1247	0.02	*
90m
Longa vs. Koizumi	0.02531	-0.03156 to 0.08219	0.3787	NS
Longa
30m vs. 60m	-0.02078	-0.08902 to 0.04746	0.7485	NS
30m vs. 90m	0.01861	-0.04964 to 0.08685	0.7926	NS
60m vs. 90m	0.03939	-0.02886 to 0.1076	0.3575	NS
Koizumi
30m vs. 60m	0.05198	-0.01626 to 0.1202	0.1702	NS
30m vs. 90m	0.04888	-0.01937 to 0.1171	0.2079	NS
60m vs. 90m	-0.003103	-0.07135 to 0.06514	0.9935	NS
Figure 2C (Ischemia - Cyan)
Two-Way Anova (% Pixels)	P Val	Symbol	DF	F (DFn, DFd)
Interaction	0.064	NS	2	F (2, 84) = 2.842
Ischemic Duration	0.1935	NS	2	F (2, 84) = 1.675
Reperfusion	0.1217	NS	1	F (1, 84) = 2.444
Tukey's Mulitple Comparison	Diff	CI	Adj P Val	Symbol
30m
Longa vs. Koizumi	0.02338	-0.006506 to 0.05328	0.1235	NS
60m
Longa vs. Koizumi	0.03253	0.002638 to 0.06242	0.0333	*
90m
Longa vs. Koizumi	-0.01521	-0.04510 to 0.01468	0.3145	NS
Longa
30m vs. 60m	0.008015	-0.02785 to 0.04388	0.8552	NS
30m vs. 90m	0.03844	0.002574 to 0.07430	0.0327	*
60m vs. 90m	0.03042	-0.005441 to 0.06629	0.1127	NS
Koizumi
30m vs. 60m	0.01716	-0.01870 to 0.05302	0.4914	NS
30m vs. 90m	-0.0001569	-0.03602 to 0.03571	>0.9999	NS
60m vs. 90m	-0.01732	-0.05318 to 0.01855	0.4851	NS
Figure 2C (Ischemia - Blue)
Two-Way Anova (% Pixels)	P Val	Symbol	DF	F (DFn, DFd)
Interaction	0.092	NS	2	F (2, 84) = 2.455
Ischemic Duration	0.3872	NS	2	F (2, 84) = 0.9596
Reperfusion	0.3286	NS	1	F (1, 84) = 0.9654
Tukey's Mulitple Comparison	Diff	CI	Adj P Val	Symbol
30m
Longa vs. Koizumi	0.02195	-0.01288 to 0.05678	0.2136	NS
60m
Longa vs. Koizumi	0.02932	-0.005506 to 0.06415	0.0978	NS
90m
Longa vs. Koizumi	-0.02146	-0.05629 to 0.01337	0.2238	NS
Longa
30m vs. 60m	0.009979	-0.03181 to 0.05177	0.8366	NS
30m vs. 90m	0.03752	-0.004267 to 0.07931	0.0875	NS
60m vs. 90m	0.02754	-0.01425 to 0.06933	0.2631	NS
Koizumi
30m vs. 60m	0.01735	-0.02443 to 0.05914	0.5847	NS
30m vs. 90m	-0.00589	-0.04768 to 0.03590	0.9396	NS
60m vs. 90m	-0.02324	-0.06503 to 0.01855	0.3842	NS
Figure 2C (Reperfusion - Red)
Two-Way Anova (% Pixels)	P Val	Symbol	DF	F (DFn, DFd)
Interaction	0.6681	NS	2	F (2, 84) = 0.4052
Ischemic Duration	0.68	NS	2	F (2, 84) = 0.3874
Reperfusion	<0.0001	****	1	F (1, 84) = 25.44
Tukey's Mulitple Comparison	Diff	CI	Adj P Val	Symbol
30m
Longa vs. Koizumi	0.1098	0.01692 to 0.2027	0.0211	*
60m
Longa vs. Koizumi	0.1299	0.03701 to 0.2228	0.0067	**
90m
Longa vs. Koizumi	0.1684	0.07546 to 0.2613	0.0005	***
Longa
30m vs. 60m	0.01866	-0.09282 to 0.1301	0.9159	NS
30m vs. 90m	-0.01088	-0.1224 to 0.1006	0.9706	NS
60m vs. 90m	-0.02954	-0.1410 to 0.08194	0.8029	NS
Koizumi
30m vs. 60m	0.03875	-0.07273 to 0.1502	0.686	NS
30m vs. 90m	0.04765	-0.06382 to 0.1591	0.5664	NS
60m vs. 90m	0.008906	-0.1026 to 0.1204	0.9802	NS
Figure 2C (Reperfusion - Yellow)
Two-Way Anova (% Pixels)	P Val	Symbol	DF	F (DFn, DFd)
Interaction	0.1398	NS	2	F (2, 84) = 2.015
Ischemic Duration	0.478	NS	2	F (2, 84) = 0.7447
Reperfusion	<0.0001	****	1	F (1, 84) = 32.55
Tukey's Mulitple Comparison	Diff	CI	Adj P Val	Symbol
30m
Longa vs. Koizumi	-0.03345	-0.06941 to 0.002515	0.0679	NS
60m
Longa vs. Koizumi	-0.0605	-0.09646 to -0.02454	0.0012	**
90m
Longa vs. Koizumi	-0.08475	-0.1207 to -0.04879	<0.0001	****
Longa
30m vs. 60m	-0.001993	-0.04514 to 0.04115	0.9933	NS
30m vs. 90m	0.0193	-0.02385 to 0.06244	0.537	NS
60m vs. 90m	0.02129	-0.02185 to 0.06444	0.4699	NS
Koizumi
30m vs. 60m	-0.02905	-0.07219 to 0.01410	0.2486	NS
30m vs. 90m	-0.03201	-0.07515 to 0.01114	0.1859	NS
60m vs. 90m	-0.002961	-0.04611 to 0.04018	0.9853	NS
Figure 2C (Reperfusion - Green)
Two-Way Anova (% Pixels)	P Val	Symbol	DF	F (DFn, DFd)
Interaction	0.8525	NS	2	F (2, 84) = 0.1599
Ischemic Duration	0.7885	NS	2	F (2, 84) = 0.2383
Reperfusion	<0.0001	****	1	F (1, 84) = 20.17
Tukey's Mulitple Comparison	Diff	CI	Adj P Val	Symbol
30m
Longa vs. Koizumi	-0.06157	-0.1140 to -0.009083	0.0221	*
60m
Longa vs. Koizumi	-0.06316	-0.1156 to -0.01068	0.0189	*
90m
Longa vs. Koizumi	-0.08059	-0.1331 to -0.02810	0.003	**
Longa
30m vs. 60m	-0.01141	-0.07438 to 0.05155	0.9022	NS
30m vs. 90m	-0.000156	-0.06312 to 0.06281	>0.9999	NS
60m vs. 90m	0.01126	-0.05171 to 0.07423	0.9047	NS
Koizumi
30m vs. 60m	-0.01301	-0.07598 to 0.04996	0.8749	NS
30m vs. 90m	-0.01918	-0.08215 to 0.04379	0.7484	NS
60m vs. 90m	-0.006171	-0.06914 to 0.05680	0.9703	NS
Figure 2C (Reperfusion - Cyan)
Two-Way Anova (% Pixels)	P Val	Symbol	DF	F (DFn, DFd)
Interaction	0.5908	NS	2	F (2, 84) = 0.5295
Ischemic Duration	0.766	NS	2	F (2, 84) = 0.2674
Reperfusion	0.0201	*	1	F (1, 84) = 5.619
Tukey's Mulitple Comparison	Diff	CI	Adj P Val	Symbol
30m
Longa vs. Koizumi	-0.007974	-0.01518 to -0.0007644	0.0306	*
60m
Longa vs. Koizumi	-0.003847	-0.01106 to 0.003362	0.2916	NS
90m
Longa vs. Koizumi	-0.003063	-0.01027 to 0.004146	0.4005	NS
Longa
30m vs. 60m	-0.00321	-0.01186 to 0.005440	0.651	NS
30m vs. 90m	-0.004313	-0.01296 to 0.004337	0.4626	NS
60m vs. 90m	-0.001104	-0.009754 to 0.007547	0.9502	NS
Koizumi
30m vs. 60m	0.000917	-0.007733 to 0.009567	0.9654	NS
30m vs. 90m	0.0005974	-0.008053 to 0.009248	0.9851	NS
60m vs. 90m	-0.0003197	-0.008970 to 0.008331	0.9957	NS
Figure 2C (Reperfusion - Blue)
Two-Way Anova (% Pixels)	P Val	Symbol	DF	F (DFn, DFd)
Interaction	0.3434	NS	2	F (2, 84) = 1.083
Ischemic Duration	0.9564	NS	2	F (2, 84) = 0.04457
Reperfusion	0.1156	NS	1	F (1, 84) = 2.528
Tukey's Mulitple Comparison	Diff	CI	Adj P Val	Symbol
30m
Longa vs. Koizumi	-0.006852	-0.01352 to -0.0001811	0.0442	*
60m
Longa vs. Koizumi	-0.00242	-0.009091 to 0.004250	0.4726	NS
90m
Longa vs. Koizumi	3.456e-05	-0.006636 to 0.006705	0.9918	NS
Longa
30m vs. 60m	-0.002042	-0.01005 to 0.005961	0.8157	NS
30m vs. 90m	-0.003951	-0.01195 to 0.004053	0.4697	NS
60m vs. 90m	-0.001909	-0.009912 to 0.006095	0.8369	NS
Koizumi
30m vs. 60m	0.00239	-0.005614 to 0.01039	0.7569	NS
30m vs. 90m	0.002935	-0.005068 to 0.01094	0.6574	NS
60m vs. 90m	0.0005459	-0.007458 to 0.008549	0.9855	NS
Figure 2C (Endpoint - Red)
Two-Way Anova (% Pixels)	P Val	Symbol	DF	F (DFn, DFd)
Interaction	0.0483	*	2	F (2, 84) = 3.143
Ischemic Duration	0.3287	NS	2	F (2, 84) = 1.127
Reperfusion	0.0002	***	1	F (1, 84) = 14.96
Tukey's Mulitple Comparison	Diff	CI	Adj P Val	Symbol
30m
Longa vs. Koizumi	0.09248	-0.02206 to 0.2070	0.1121	NS
60m
Longa vs. Koizumi	0.04949	-0.06505 to 0.1640	0.3926	NS
90m
Longa vs. Koizumi	0.2439	0.1293 to 0.3584	<0.0001	****
Longa
30m vs. 60m	0.05698	-0.08045 to 0.1944	0.5857	NS
30m vs. 90m	-0.01482	-0.1522 to 0.1226	0.9642	NS
60m vs. 90m	-0.0718	-0.2092 to 0.06563	0.4294	NS
Koizumi
30m vs. 60m	0.01399	-0.1234 to 0.1514	0.968	NS
30m vs. 90m	0.1366	-0.0008506 to 0.2740	0.0518	NS
60m vs. 90m	0.1226	-0.01484 to 0.2600	0.0902	NS
Figure 2C (Endpoint - Yellow)
Two-Way Anova (% Pixels)	P Val	Symbol	DF	F (DFn, DFd)
Interaction	0.0466	*	2	F (2, 84) = 3.181
Ischemic Duration	0.3968	NS	2	F (2, 84) = 0.9345
Reperfusion	<0.0001	****	1	F (1, 84) = 19.92
Tukey's Mulitple Comparison	Diff	CI	Adj P Val	Symbol
30m
Longa vs. Koizumi	-0.02162	-0.05645 to 0.01322	0.2206	NS
60m
Longa vs. Koizumi	-0.03322	-0.06805 to 0.001615	0.0613	NS
90m
Longa vs. Koizumi	-0.08058	-0.1154 to -0.04575	<0.0001	****
Longa
30m vs. 60m	-0.00554	-0.04733 to 0.03625	0.9464	NS
30m vs. 90m	0.01292	-0.02887 to 0.05472	0.7417	NS
60m vs. 90m	0.01846	-0.02333 to 0.06026	0.5451	NS
Koizumi
30m vs. 60m	-0.01714	-0.05893 to 0.02465	0.5923	NS
30m vs. 90m	-0.04604	-0.08784 to -0.004251	0.0273	*
60m vs. 90m	-0.0289	-0.07069 to 0.01289	0.2307	NS
Figure 2C (Endpoint - Green)
Two-Way Anova (% Pixels)	P Val	Symbol	DF	F (DFn, DFd)
Interaction	0.0734	NS	2	F (2, 84) = 2.695
Ischemic Duration	0.3043	NS	2	F (2, 84) = 1.207
Reperfusion	0.0008	***	1	F (1, 84) = 12.15
Tukey's Mulitple Comparison	Diff	CI	Adj P Val	Symbol
30m
Longa vs. Koizumi	-0.04969	-0.1150 to 0.01562	0.134	NS
60m
Longa vs. Koizumi	-0.02229	-0.08760 to 0.04302	0.4992	NS
90m
Longa vs. Koizumi	-0.1263	-0.1916 to -0.06099	0.0002	***
Longa
30m vs. 60m	-0.03624	-0.1146 to 0.04212	0.5146	NS
30m vs. 90m	0.002637	-0.07572 to 0.08100	0.9965	NS
60m vs. 90m	0.03888	-0.03948 to 0.1172	0.4661	NS
Koizumi
30m vs. 60m	-0.008843	-0.08720 to 0.06952	0.9608	NS
30m vs. 90m	-0.07397	-0.1523 to 0.004386	0.0684	NS
60m vs. 90m	-0.06513	-0.1435 to 0.01323	0.1227	NS
Figure 2C (Endpoint - Cyan)
Two-Way Anova (% Pixels)	P Val	Symbol	DF	F (DFn, DFd)
Interaction	0.1793	NS	2	F (2, 84) = 1.754
Ischemic Duration	0.5388	NS	2	F (2, 84) = 0.6230
Reperfusion	0.0572	NS	1	F (1, 84) = 3.719
Tukey's Mulitple Comparison	Diff	CI	Adj P Val	Symbol
30m
Longa vs. Koizumi	-0.01061	-0.02777 to 0.006551	0.2223	NS
60m
Longa vs. Koizumi	0.002289	-0.01487 to 0.01945	0.7915	NS
90m
Longa vs. Koizumi	-0.0205	-0.03767 to -0.003343	0.0198	*
Longa
30m vs. 60m	-0.008977	-0.02957 to 0.01161	0.5538	NS
30m vs. 90m	-0.001795	-0.02239 to 0.01880	0.9764	NS
60m vs. 90m	0.007182	-0.01341 to 0.02777	0.6841	NS
Koizumi
30m vs. 60m	0.003923	-0.01667 to 0.02451	0.8925	NS
30m vs. 90m	-0.01169	-0.03228 to 0.008902	0.3695	NS
60m vs. 90m	-0.01561	-0.03620 to 0.004979	0.1729	NS
Figure 2C (Endpoint - Blue)
Two-Way Anova (% Pixels)	P Val	Symbol	DF	F (DFn, DFd)
Interaction	0.1789	NS	2	F (2, 84) = 1.757
Ischemic Duration	0.8729	NS	2	F (2, 84) = 0.1361
Reperfusion	0.0895	NS	1	F (1, 84) = 2.951
Tukey's Mulitple Comparison	Diff	CI	Adj P Val	Symbol
30m
Longa vs. Koizumi	-0.01057	-0.02616 to 0.005024	0.1814	NS
60m
Longa vs. Koizumi	0.003726	-0.01187 to 0.01932	0.6358	NS
90m
Longa vs. Koizumi	-0.01649	-0.03208 to -0.0008941	0.0385	*
Longa
30m vs. 60m	-0.006221	-0.02493 to 0.01249	0.7081	NS
30m vs. 90m	0.001049	-0.01766 to 0.01976	0.9902	NS
60m vs. 90m	0.00727	-0.01144 to 0.02598	0.6247	NS
Koizumi
30m vs. 60m	0.008073	-0.01063 to 0.02678	0.5603	NS
30m vs. 90m	-0.004869	-0.02358 to 0.01384	0.809	NS
60m vs. 90m	-0.01294	-0.03165 to 0.005765	0.2304	NS
Figure 2D (Ischemia)
Two-Way Anova (Speckle Score)	P Val	Symbol	DF	F (DFn, DFd)
Interaction	0.1254	NS	2	F (2, 84) = 2.129
Ischemic Duration	0.1742	NS	2	F (2, 84) = 1.785
Reperfusion	0.0896	NS	1	F (1, 84) = 2.949
Tukey's Mulitple Comparison	Diff	CI	Adj P Val	Symbol
30m
Longa vs. Koizumi	-0.1338	-0.4120 to 0.1445	0.3417	NS
60m
Longa vs. Koizumi	-0.3453	-0.6236 to -0.06704	0.0156	*
90m
Longa vs. Koizumi	0.06293	-0.2153 to 0.3412	0.6541	NS
Longa
30m vs. 60m	-0.01695	-0.3508 to 0.3169	0.9919	NS
30m vs. 90m	-0.2818	-0.6157 to 0.05203	0.1151	NS
60m vs. 90m	-0.2649	-0.5987 to 0.06897	0.147	NS
Koizumi
30m vs. 60m	-0.2285	-0.5623 to 0.1054	0.2377	NS
30m vs. 90m	-0.08512	-0.4190 to 0.2487	0.816	NS
60m vs. 90m	0.1433	-0.1905 to 0.4772	0.5636	NS
Figure 2D (Reperfusion)
Two-Way Anova (Speckle Score)	P Val	Symbol	DF	F (DFn, DFd)
Interaction	0.905	NS	2	F (2, 84) = 0.09996
Ischemic Duration	0.7617	NS	2	F (2, 84) = 0.2731
Reperfusion	<0.0001	****	1	F (1, 84) = 20.36
Tukey's Mulitple Comparison	Diff	CI	Adj P Val	Symbol
30m
Longa vs. Koizumi	0.2079	0.03720 to 0.3786	0.0176	*
60m
Longa vs. Koizumi	0.208	0.03733 to 0.3787	0.0175	*
90m
Longa vs. Koizumi	0.255	0.08428 to 0.4257	0.0039	**
Longa
30m vs. 60m	0.04262	-0.1622 to 0.2474	0.8732	NS
30m vs. 90m	0.009757	-0.1951 to 0.2146	0.9929	NS
60m vs. 90m	-0.03286	-0.2377 to 0.1719	0.9225	NS
Koizumi
30m vs. 60m	0.04275	-0.1621 to 0.2476	0.8724	NS
30m vs. 90m	0.05683	-0.1480 to 0.2616	0.786	NS
60m vs. 90m	0.01408	-0.1907 to 0.2189	0.9853	NS
Figure 2D (Endpoint)
Two-Way Anova (Speckle Score)	P Val	Symbol	DF	F (DFn, DFd)
Interaction	0.0663	NS	2	F (2, 84) = 2.804
Ischemic Duration	0.4147	NS	2	F (2, 84) = 0.8896
Reperfusion	0.0012	**	1	F (1, 84) = 11.20
Tukey's Mulitple Comparison	Diff	CI	Adj P Val	Symbol
30m
Longa vs. Koizumi	0.1951	-0.04905 to 0.4392	0.1158	NS
60m
Longa vs. Koizumi	0.05603	-0.1881 to 0.3002	0.6493	NS
90m
Longa vs. Koizumi	0.4606	0.2165 to 0.7048	0.0003	***
Longa
30m vs. 60m	0.1298	-0.1631 to 0.4228	0.543	NS
30m vs. 90m	-0.01701	-0.3099 to 0.2759	0.9895	NS
60m vs. 90m	-0.1468	-0.4398 to 0.1461	0.4588	NS
Koizumi
30m vs. 60m	-0.009233	-0.3022 to 0.2837	0.9969	NS
30m vs. 90m	0.2485	-0.04440 to 0.5415	0.1126	NS
60m vs. 90m	0.2578	-0.03516 to 0.5507	0.096	NS
Figure 3C (24h)
Two-Way Anova (Distance Traveled Fold Change)	P Val	Symbol	DF	F (DFn, DFd)
Interaction	0.2162	NS	2	F (2, 82) = 1.561
Ischemic Duration	0.0003	***	2	F (2, 82) = 8.881
Reperfusion	0.1952	NS	1	F (1, 82) = 1.706
Tukey's Mulitple Comparison	Diff	CI	Adj P Val	Symbol
30m
Longa vs. Koizumi	-0.1763	-0.4095 to 0.05690	0.1364	NS
60m
Longa vs. Koizumi	-0.1757	-0.4088 to 0.05752	0.1378	NS
90m
Longa vs. Koizumi	0.08363	-0.1577 to 0.3250	0.4926	NS
Longa
30m vs. 60m	0.1907	-0.08913 to 0.4704	0.2403	NS
30m vs. 90m	0.2248	-0.05996 to 0.5095	0.1497	NS
60m vs. 90m	0.03413	-0.2506 to 0.3189	0.9559	NS
Koizumi
30m vs. 60m	0.1913	-0.08851 to 0.4711	0.2381	NS
30m vs. 90m	0.4847	0.1999 to 0.7694	0.0003	***
60m vs. 90m	0.2934	0.008669 to 0.5782	0.0419	*
Figure 3C (72h)
Two-Way Anova (Distance Traveled Fold Change)	P Val	Symbol	DF	F (DFn, DFd)
Interaction	0.0568	NS	2	F (2, 79) = 2.974
Ischemic Duration	0.0023	**	2	F (2, 79) = 6.554
Reperfusion	0.8019	NS	1	F (1, 79) = 0.06339
Tukey's Mulitple Comparison	Diff	CI	Adj P Val	Symbol
30m
Longa vs. Koizumi	0.2407	-0.04597 to 0.5274	0.0986	NS
60m
Longa vs. Koizumi	-0.2628	-0.5596 to 0.03394	0.0818	NS
90m
Longa vs. Koizumi	-0.04261	-0.3450 to 0.2598	0.7798	NS
Longa
30m vs. 60m	0.4459	0.09579 to 0.7961	0.0089	**
30m vs. 90m	0.5203	0.1632 to 0.8773	0.0023	**
60m vs. 90m	0.07433	-0.2886 to 0.4373	0.8766	NS
Koizumi
30m vs. 60m	-0.05761	-0.4078 to 0.2925	0.9185	NS
30m vs. 90m	0.2369	-0.1132 to 0.5871	0.2448	NS
60m vs. 90m	0.2945	-0.06160 to 0.6507	0.125	NS
Figure 3D (24h)
Two-Way Anova (Average Speed Fold Change)	P Val	Symbol	DF	F (DFn, DFd)
Interaction	0.2125	NS	2	F (2, 82) = 1.579
Ischemic Duration	0.0003	***	2	F (2, 82) = 8.956
Reperfusion	0.1904	NS	1	F (1, 82) = 1.744
Tukey's Mulitple Comparison	Diff	CI	Adj P Val	Symbol
30m
Longa vs. Koizumi	-0.1792	-0.4124 to 0.05396	0.1301	NS
60m
Longa vs. Koizumi	-0.1757	-0.4088 to 0.05753	0.1378	NS
90m
Longa vs. Koizumi	0.08363	-0.1577 to 0.3250	0.4926	NS
Longa
30m vs. 60m	0.1907	-0.08914 to 0.4705	0.2403	NS
30m vs. 90m	0.2248	-0.05997 to 0.5095	0.1497	NS
60m vs. 90m	0.03413	-0.2506 to 0.3189	0.9559	NS
Koizumi
30m vs. 60m	0.1942	-0.08558 to 0.4740	0.228	NS
30m vs. 90m	0.4876	0.2029 to 0.7724	0.0003	***
60m vs. 90m	0.2934	0.008660 to 0.5782	0.0419	*
Figure 3D (72h)
Two-Way Anova (Average Speed Fold Change)	P Val	Symbol	DF	F (DFn, DFd)
Interaction	0.0625	NS	2	F (2, 79) = 2.872
Ischemic Duration	0.0026	**	2	F (2, 79) = 6.405
Reperfusion	0.7771	NS	1	F (1, 79) = 0.08070
Tukey's Mulitple Comparison	Diff	CI	Adj P Val	Symbol
30m
Longa vs. Koizumi	0.2324	-0.05434 to 0.5192	0.1107	NS
60m
Longa vs. Koizumi	-0.2628	-0.5596 to 0.03399	0.0819	NS
90m
Longa vs. Koizumi	-0.04262	-0.3451 to 0.2599	0.7799	NS
Longa
30m vs. 60m	0.4376	0.08742 to 0.7878	0.0104	*
30m vs. 90m	0.512	0.1549 to 0.8691	0.0028	**
60m vs. 90m	0.07433	-0.2886 to 0.4373	0.8767	NS
Koizumi
30m vs. 60m	-0.05761	-0.4078 to 0.2926	0.9185	NS
30m vs. 90m	0.2369	-0.1133 to 0.5871	0.2449	NS
60m vs. 90m	0.2945	-0.06166 to 0.6507	0.1251	NS
Figure 3E (24h)
Two-Way Anova (Border Transitions Fold Change)	P Val	Symbol	DF	F (DFn, DFd)
Interaction	0.5117	NS	2	F (2, 79) = 0.6756
Ischemic Duration	0.0001	***	2	F (2, 79) = 10.07
Reperfusion	0.3486	NS	1	F (1, 79) = 0.8892
Tukey's Mulitple Comparison	Diff	CI	Adj P Val	Symbol
30m
Longa vs. Koizumi	-0.1494	-0.3511 to 0.05219	0.1441	NS
60m
Longa vs. Koizumi	-0.04094	-0.2461 to 0.1643	0.6924	NS
90m
Longa vs. Koizumi	0.01979	-0.1968 to 0.2364	0.8562	NS
Longa
30m vs. 60m	0.1383	-0.1036 to 0.3803	0.3638	NS
30m vs. 90m	0.2459	-0.005222 to 0.4970	0.0563	NS
60m vs. 90m	0.1075	-0.1436 to 0.3587	0.5646	NS
Koizumi
30m vs. 60m	0.2468	0.0005888 to 0.4931	0.0493	*
30m vs. 90m	0.4151	0.1640 to 0.6662	0.0005	***
60m vs. 90m	0.1683	-0.08697 to 0.4235	0.2625	NS
Figure 3E (72h)
Two-Way Anova (Border Transitions Fold Change)	P Val	Symbol	DF	F (DFn, DFd)
Interaction	0.2744	NS	2	F (2, 77) = 1.315
Ischemic Duration	0.0021	**	2	F (2, 77) = 6.700
Reperfusion	0.5526	NS	1	F (1, 77) = 0.3559
Tukey's Mulitple Comparison	Diff	CI	Adj P Val	Symbol
30m
Longa vs. Koizumi	0.1713	-0.1397 to 0.4822	0.2761	NS
60m
Longa vs. Koizumi	-0.16	-0.4891 to 0.1692	0.3361	NS
90m
Longa vs. Koizumi	0.1542	-0.1621 to 0.4704	0.3347	NS
Longa
30m vs. 60m	0.4997	0.1202 to 0.8792	0.0066	**
30m vs. 90m	0.3792	-0.0003683 to 0.7587	0.0503	NS
60m vs. 90m	-0.1205	-0.5001 to 0.2590	0.7291	NS
Koizumi
30m vs. 60m	0.1684	-0.2205 to 0.5574	0.5572	NS
30m vs. 90m	0.3621	-0.01109 to 0.7352	0.0591	NS
60m vs. 90m	0.1936	-0.2014 to 0.5887	0.4738	NS
Figure 3F (24h)
Two-Way Anova (% Time Moving Fold Change)	P Val	Symbol	DF	F (DFn, DFd)
Interaction	0.058	NS	2	F (2, 79) = 2.952
Ischemic Duration	0.002	**	2	F (2, 79) = 6.758
Reperfusion	0.3779	NS	1	F (1, 79) = 0.7862
Tukey's Mulitple Comparison	Diff	CI	Adj P Val	Symbol
30m
Longa vs. Koizumi	-0.348	-0.6337 to -0.06227	0.0176	*
60m
Longa vs. Koizumi	0.002259	-0.2779 to 0.2824	0.9872	NS
90m
Longa vs. Koizumi	0.1269	-0.1581 to 0.4118	0.3782	NS
Longa
30m vs. 60m	0.1062	-0.2367 to 0.4490	0.7407	NS
30m vs. 90m	0.1145	-0.2340 to 0.4630	0.7135	NS
60m vs. 90m	0.00831	-0.3279 to 0.3446	0.9981	NS
Koizumi
30m vs. 60m	0.4564	0.1202 to 0.7927	0.0049	**
30m vs. 90m	0.5893	0.2531 to 0.9256	0.0002	***
60m vs. 90m	0.1329	-0.2091 to 0.4749	0.624	NS
Figure 3F (72h)
Two-Way Anova (% Time Moving Fold Change)	P Val	Symbol	DF	F (DFn, DFd)
Interaction	0.0002	***	2	F (2, 78) = 9.829
Ischemic Duration	<0.0001	****	2	F (2, 78) = 11.71
Reperfusion	0.0007	***	1	F (1, 78) = 12.60
Tukey's Mulitple Comparison	Diff	CI	Adj P Val	Symbol
30m
Longa vs. Koizumi	-9.577	-12.94 to -6.213	<0.0001	****
60m
Longa vs. Koizumi	-0.5625	-3.926 to 2.801	0.7401	NS
90m
Longa vs. Koizumi	-0.2499	-3.614 to 3.114	0.8828	NS
Longa
30m vs. 60m	0.2873	-3.750 to 4.324	0.9842	NS
30m vs. 90m	0.5308	-3.648 to 4.710	0.9505	NS
60m vs. 90m	0.2435	-3.794 to 4.281	0.9886	NS
Koizumi
30m vs. 60m	9.302	5.265 to 13.34	<0.0001	****
30m vs. 90m	9.858	5.968 to 13.75	<0.0001	****
60m vs. 90m	0.5561	-3.481 to 4.593	0.9421	NS
Figure 4B
Two-Way Anova (Cells/FOV)	P Val	Symbol	DF	F (DFn, DFd)
Interaction	0.2186	NS	2	F (2, 24) = 1.621
Ischemic Duration	0.8918	NS	2	F (2, 24) = 0.1151
Reperfusion	0.3937	NS	1	F (1, 24) = 0.7544
Tukey's Mulitple Comparison	Diff	CI	Adj P Val	Symbol
30m
Longa vs. Koizumi	-3.583	-32.38 to 25.22	0.7995	NS
60m
Longa vs. Koizumi	25.64	-0.3511 to 51.64	0.0529	NS
90m
Longa vs. Koizumi	-2.133	-29.28 to 25.02	0.8725	NS
Longa
30m vs. 60m	-18.94	-52.47 to 14.59	0.3513	NS
30m vs. 90m	-2.033	-36.88 to 32.81	0.9884	NS
60m vs. 90m	16.91	-14.54 to 48.37	0.3862	NS
Koizumi
30m vs. 60m	10.28	-22.57 to 43.14	0.7176	NS
30m vs. 90m	-0.5833	-33.44 to 32.27	0.9989	NS
60m vs. 90m	-10.87	-43.72 to 21.99	0.6908	NS
Figure 4C
Two-Way Anova (Cell Volume)	P Val	Symbol	DF	F (DFn, DFd)
Interaction	0.3213	NS	2	F (2, 24) = 1.191
Ischemic Duration	0.3087	NS	2	F (2, 24) = 1.235
Reperfusion	0.1236	NS	1	F (1, 24) = 2.546
Tukey's Mulitple Comparison	Diff	CI	Adj P Val	Symbol
30m
Longa vs. Koizumi	-22.31	-276.8 to 232.2	0.858	NS
60m
Longa vs. Koizumi	246.8	-7.725 to 501.2	0.0568	NS
90m
Longa vs. Koizumi	116.3	-138.1 to 370.8	0.3548	NS
Longa
30m vs. 60m	-263.7	-571.6 to 44.22	0.1031	NS
30m vs. 90m	-173.5	-481.4 to 134.4	0.3532	NS
60m vs. 90m	90.21	-217.7 to 398.1	0.7473	NS
Koizumi
30m vs. 60m	5.36	-302.6 to 313.3	0.999	NS
30m vs. 90m	-34.83	-342.7 to 273.1	0.957	NS
60m vs. 90m	-40.19	-348.1 to 267.7	0.9433	NS
Figure 4D
Two-Way Anova (Cell Sphericity)	P Val	Symbol	DF	F (DFn, DFd)
Interaction	0.4205	NS	2	F (2, 24) = 0.8982
Ischemic Duration	0.0464	*	2	F (2, 24) = 3.498
Reperfusion	0.2224	NS	1	F (1, 24) = 1.569
Tukey's Mulitple Comparison	Diff	CI	Adj P Val	Symbol
30m
Longa vs. Koizumi	0.003298	-0.02923 to 0.03583	0.836	NS
60m
Longa vs. Koizumi	-0.02657	-0.05910 to 0.005963	0.1048	NS
90m
Longa vs. Koizumi	-0.01093	-0.04346 to 0.02160	0.4948	NS
Longa
30m vs. 60m	0.008476	-0.03197 to 0.04892	0.9339	NS
30m vs. 90m	-0.02102	-0.06147 to 0.01942	0.4779	NS
60m vs. 90m	-0.0295	-0.06994 to 0.01094	0.2047	NS
Koizumi
30m vs. 60m	-0.02139	-0.06183 to 0.01906	0.4634	NS
30m vs. 90m	-0.03525	-0.07569 to 0.005196	0.101	NS
60m vs. 90m	-0.01386	-0.05430 to 0.02658	0.7707	NS
Figure 4E
Two-Way Anova (Cell-Cell Distance)	P Val	Symbol	DF	F (DFn, DFd)
Interaction	0.7984	NS	2	F (2, 23) = 0.2273
Ischemic Duration	0.0103	*	2	F (2, 23) = 5.617
Reperfusion	0.4836	NS	1	F (1, 23) = 0.5070
Tukey's Mulitple Comparison	Diff	CI	Adj P Val	Symbol
30m
Longa vs. Koizumi	32	-40.20 to 104.2	0.3687	NS
60m
Longa vs. Koizumi	8.832	-59.23 to 76.90	0.7908	NS
90m
Longa vs. Koizumi	0.5851	-67.48 to 68.65	0.986	NS
Longa
30m vs. 60m	41.83	-45.57 to 129.2	0.4659	NS
30m vs. 90m	94.9	7.504 to 182.3	0.0316	*
60m vs. 90m	53.07	-29.33 to 135.5	0.2605	NS
Koizumi
30m vs. 60m	18.67	-63.73 to 101.1	0.8387	NS
30m vs. 90m	63.49	-18.91 to 145.9	0.1531	NS
60m vs. 90m	44.82	-37.58 to 127.2	0.3766	NS
Figure 4G
Two-Way Anova (Cells/FOV)	P Val	Symbol	DF	F (DFn, DFd)
Interaction	0.2859	NS	2	F (2, 24) = 1.320
Ischemic Duration	0.0961	NS	2	F (2, 24) = 2.587
Reperfusion	0.0058	**	1	F (1, 24) = 9.157
Tukey's Mulitple Comparison	Diff	CI	Adj P Val	Symbol
30m
Longa vs. Koizumi	34.3	11.14 to 57.46	0.0054	**
60m
Longa vs. Koizumi	14.29	-8.867 to 37.45	0.215	NS
90m
Longa vs. Koizumi	10.22	-12.94 to 33.38	0.3714	NS
Longa
30m vs. 60m	-7.624	-35.64 to 20.40	0.7775	NS
30m vs. 90m	-0.1133	-28.13 to 27.91	>0.9999	NS
60m vs. 90m	7.511	-20.51 to 35.53	0.7833	NS
Koizumi
30m vs. 60m	-27.63	-55.65 to 0.3873	0.0538	NS
30m vs. 90m	-24.19	-52.21 to 3.827	0.0997	NS
60m vs. 90m	3.44	-24.58 to 31.46	0.9496	NS
Figure 4H
Two-Way Anova (Cell Volume)	P Val	Symbol	DF	F (DFn, DFd)
Interaction	0.3506	NS	2	F (2, 23) = 1.097
Ischemic Duration	0.8728	NS	2	F (2, 23) = 0.1368
Reperfusion	0.0009	***	1	F (1, 23) = 14.66
Tukey's Mulitple Comparison	Diff	CI	Adj P Val	Symbol
30m
Longa vs. Koizumi	508	123.0 to 893.0	0.0119	*
60m
Longa vs. Koizumi	558.1	149.8 to 966.5	0.0095	**
90m
Longa vs. Koizumi	193.3	-191.7 to 578.3	0.3098	NS
Longa
30m vs. 60m	-95.73	-590.1 to 398.6	0.8791	NS
30m vs. 90m	118.8	-347.3 to 584.8	0.8008	NS
60m vs. 90m	214.5	-279.8 to 708.8	0.5317	NS
Koizumi
30m vs. 60m	-45.61	-511.7 to 420.4	0.9675	NS
30m vs. 90m	-196	-662.0 to 270.1	0.552	NS
60m vs. 90m	-150.4	-616.4 to 315.7	0.702	NS
Figure 4I
Two-Way Anova (Cell Sphericity)	P Val	Symbol	DF	F (DFn, DFd)
Interaction	0.0086	**	2	F (2, 24) = 5.832
Ischemic Duration	0.1471	NS	2	F (2, 24) = 2.078
Reperfusion	0.2804	NS	1	F (1, 24) = 1.219
Tukey's Mulitple Comparison	Diff	CI	Adj P Val	Symbol
30m
Longa vs. Koizumi	-0.02751	-0.05438 to -0.0006310	0.0452	*
60m
Longa vs. Koizumi	0.03143	0.004555 to 0.05830	0.0238	*
90m
Longa vs. Koizumi	0.02098	-0.005894 to 0.04785	0.1202	NS
Longa
30m vs. 60m	-0.03312	-0.06564 to -0.0006025	0.0453	*
30m vs. 90m	-0.04202	-0.07453 to -0.009497	0.0097	**
60m vs. 90m	-0.008895	-0.04141 to 0.02362	0.7755	NS
Koizumi
30m vs. 60m	0.02582	-0.006703 to 0.05833	0.1382	NS
30m vs. 90m	0.006471	-0.02605 to 0.03899	0.8734	NS
60m vs. 90m	-0.01934	-0.05186 to 0.01317	0.3154	NS
Figure 4J
Two-Way Anova (Cell-Cell Distance)	P Val	Symbol	DF	F (DFn, DFd)
Interaction	0.2978	NS	2	F (2, 21) = 1.284
Ischemic Duration	0.0029	**	2	F (2, 21) = 7.801
Reperfusion	0.211	NS	1	F (1, 21) = 1.664
Tukey's Mulitple Comparison	Diff	CI	Adj P Val	Symbol
30m
Longa vs. Koizumi	-53.1	-123.3 to 17.06	0.1305	NS
60m
Longa vs. Koizumi	-32.2	-96.65 to 32.26	0.3107	NS
90m
Longa vs. Koizumi	15.2	-45.57 to 75.96	0.6085	NS
Longa
30m vs. 60m	45.27	-32.85 to 123.4	0.3295	NS
30m vs. 90m	53.77	-19.89 to 127.4	0.1812	NS
60m vs. 90m	8.5	-69.62 to 86.62	0.9595	NS
Koizumi
30m vs. 60m	66.17	-18.87 to 151.2	0.1467	NS
30m vs. 90m	122.1	37.02 to 207.1	0.0044	**
60m vs. 90m	55.89	-17.76 to 129.5	0.1598	NS
Figure 5B
Two-Way Anova (Cells/FOV)	P Val	Symbol	DF	F (DFn, DFd)
Interaction	0.3214	NS	2	F (2, 30) = 1.179
Ischemic Duration	0.0382	*	2	F (2, 30) = 3.647
Reperfusion	0.6203	NS	1	F (1, 30) = 0.2505
Tukey's Mulitple Comparison	Diff	CI	Adj P Val	Symbol
30m
Longa vs. Koizumi	-1.25	-6.782 to 4.282	0.6478	NS
60m
Longa vs. Koizumi	4.193	-1.418 to 9.803	0.1374	NS
90m
Longa vs. Koizumi	-0.5833	-6.115 to 4.949	0.831	NS
Longa
30m vs. 60m	-6.698	-13.13 to -0.2635	0.04	*
30m vs. 90m	-5.194	-11.87 to 1.483	0.1512	NS
60m vs. 90m	1.504	-4.931 to 7.939	0.8338	NS
Koizumi
30m vs. 60m	-1.256	-8.259 to 5.748	0.8983	NS
30m vs. 90m	-4.528	-11.21 to 2.150	0.2325	NS
60m vs. 90m	-3.272	-10.28 to 3.732	0.4906	NS
Figure 5C
Two-Way Anova (Cell Volume)	P Val	Symbol	DF	F (DFn, DFd)
Interaction	0.2789	NS	2	F (2, 21) = 1.358
Ischemic Duration	0.8265	NS	2	F (2, 21) = 0.1923
Reperfusion	0.3294	NS	1	F (1, 21) = 0.9968
Tukey's Mulitple Comparison	Diff	CI	Adj P Val	Symbol
30m
Longa vs. Koizumi	147.8	-892.1 to 1188	0.7705	NS
60m
Longa vs. Koizumi	866.5	-120.0 to 1853	0.082	NS
90m
Longa vs. Koizumi	-194	-1124 to 736.1	0.6689	NS
Longa
30m vs. 60m	-556.9	-1753 to 638.8	0.4812	NS
30m vs. 90m	133.8	-1062 to 1329	0.9572	NS
60m vs. 90m	690.7	-436.6 to 1818	0.2913	NS
Koizumi
30m vs. 60m	161.9	-1098 to 1422	0.944	NS
30m vs. 90m	-207.9	-1404 to 987.7	0.9	NS
60m vs. 90m	-369.8	-1565 to 825.9	0.7194	NS
Figure 5D
Two-Way Anova (Cell Sphericity)	P Val	Symbol	DF	F (DFn, DFd)
Interaction	0.9487	NS	2	F (2, 23) = 0.05279
Ischemic Duration	0.0845	NS	2	F (2, 23) = 2.757
Reperfusion	0.1706	NS	1	F (1, 23) = 2.001
Tukey's Mulitple Comparison	Diff	CI	Adj P Val	Symbol
30m
Longa vs. Koizumi	0.01937	-0.04059 to 0.07933	0.5106	NS
60m
Longa vs. Koizumi	0.01888	-0.03765 to 0.07541	0.4966	NS
90m
Longa vs. Koizumi	0.03008	-0.02645 to 0.08662	0.2823	NS
Longa
30m vs. 60m	-0.03402	-0.1066 to 0.03857	0.4803	NS
30m vs. 90m	-0.0505	-0.1231 to 0.02209	0.2114	NS
60m vs. 90m	-0.01648	-0.08493 to 0.05196	0.8198	NS
Koizumi
30m vs. 60m	-0.03451	-0.1030 to 0.03393	0.4298	NS
30m vs. 90m	-0.03979	-0.1082 to 0.02865	0.33	NS
60m vs. 90m	-0.00528	-0.07372 to 0.06316	0.9797	NS
Figure 5E
Two-Way Anova (% Intravascular Cells)	P Val	Symbol	DF	F (DFn, DFd)
Interaction	0.9663	NS	2	F (2, 20) = 0.03436
Ischemic Duration	0.5494	NS	2	F (2, 20) = 0.6172
Reperfusion	0.5584	NS	1	F (1, 20) = 0.3543
Tukey's Mulitple Comparison	Diff	CI	Adj P Val	Symbol
30m
Longa vs. Koizumi	9.2	-35.17 to 53.57	0.67	NS
60m
Longa vs. Koizumi	9.278	-32.81 to 51.37	0.6506	NS
90m
Longa vs. Koizumi	2.706	-39.38 to 44.80	0.8947	NS
Longa
30m vs. 60m	-13.54	-67.35 to 40.27	0.8019	NS
30m vs. 90m	3.884	-49.93 to 57.70	0.9818	NS
60m vs. 90m	17.43	-36.39 to 71.24	0.6957	NS
Koizumi
30m vs. 60m	-13.46	-64.51 to 37.59	0.7849	NS
30m vs. 90m	-2.61	-53.66 to 48.44	0.9908	NS
60m vs. 90m	10.85	-37.28 to 58.98	0.8372	NS
Figure 5G
Two-Way Anova (Cells/FOV)	P Val	Symbol	DF	F (DFn, DFd)
Interaction	0.3336	NS	2	F (2, 29) = 1.140
Ischemic Duration	<0.0001	****	2	F (2, 29) = 15.04
Reperfusion	0.2083	NS	1	F (1, 29) = 1.656
Tukey's Mulitple Comparison	Diff	CI	Adj P Val	Symbol
30m
Longa vs. Koizumi	2.456	-2.018 to 6.929	0.2708	NS
60m
Longa vs. Koizumi	3.297	-0.8132 to 7.407	0.1117	NS
90m
Longa vs. Koizumi	-1.006	-5.479 to 3.468	0.6491	NS
Longa
30m vs. 60m	-4.38	-9.343 to 0.5828	0.0917	NS
30m vs. 90m	-6.744	-12.15 to -1.343	0.012	*
60m vs. 90m	-2.364	-7.588 to 2.859	0.511	NS
Koizumi
30m vs. 60m	-3.539	-8.941 to 1.863	0.2543	NS
30m vs. 90m	-10.21	-15.61 to -4.804	0.0002	***
60m vs. 90m	-6.667	-11.82 to -1.516	0.0091	**
Figure 5H
Two-Way Anova (Cell Volume)	P Val	Symbol	DF	F (DFn, DFd)
Interaction	0.0739	NS	2	F (2, 21) = 2.956
Ischemic Duration	0.7813	NS	2	F (2, 21) = 0.2497
Reperfusion	0.0044	**	1	F (1, 21) = 10.19
Tukey's Mulitple Comparison	Diff	CI	Adj P Val	Symbol
30m
Longa vs. Koizumi	797.4	-29.78 to 1625	0.0581	NS
60m
Longa vs. Koizumi	1224	463.9 to 1983	0.003	**
90m
Longa vs. Koizumi	23.34	-693.0 to 739.7	0.9466	NS
Longa
30m vs. 60m	-400	-1321 to 520.8	0.5276	NS
30m vs. 90m	316.8	-551.4 to 1185	0.6341	NS
60m vs. 90m	716.9	-204.0 to 1638	0.1465	NS
Koizumi
30m vs. 60m	26.26	-976.3 to 1029	0.9976	NS
30m vs. 90m	-457.2	-1460 to 545.4	0.4954	NS
60m vs. 90m	-483.4	-1352 to 384.8	0.3572	NS
Figure 5I
Two-Way Anova (Cell Sphericity)	P Val	Symbol	DF	F (DFn, DFd)
Interaction	0.5992	NS	2	F (2, 21) = 0.5249
Ischemic Duration	0.5276	NS	2	F (2, 21) = 0.6592
Reperfusion	0.7135	NS	1	F (1, 21) = 0.1385
Tukey's Mulitple Comparison	Diff	CI	Adj P Val	Symbol
30m
Longa vs. Koizumi	-0.01899	-0.06979 to 0.03180	0.4455	NS
60m
Longa vs. Koizumi	-0.008501	-0.05516 to 0.03816	0.7086	NS
90m
Longa vs. Koizumi	0.01285	-0.03114 to 0.05684	0.5499	NS
Longa
30m vs. 60m	-0.01495	-0.07150 to 0.04160	0.7853	NS
30m vs. 90m	-0.007924	-0.06124 to 0.04539	0.9258	NS
60m vs. 90m	0.007022	-0.04953 to 0.06357	0.9476	NS
Koizumi
30m vs. 60m	-0.004454	-0.06602 to 0.05711	0.9819	NS
30m vs. 90m	0.02392	-0.03764 to 0.08549	0.5975	NS
60m vs. 90m	0.02838	-0.02494 to 0.08169	0.3888	NS
Figure 5J
Two-Way Anova (% Intravascular Cells)	P Val	Symbol	DF	F (DFn, DFd)
Interaction	0.3385	NS	2	F (2, 17) = 1.155
Ischemic Duration	0.9788	NS	2	F (2, 17) = 0.02149
Reperfusion	0.2901	NS	1	F (1, 17) = 1.192
Tukey's Mulitple Comparison	Diff	CI	Adj P Val	Symbol
30m
Longa vs. Koizumi	-27.27	-69.88 to 15.34	0.1946	NS
60m
Longa vs. Koizumi	-18.31	-53.31 to 16.70	0.2853	NS
90m
Longa vs. Koizumi	10.88	-27.23 to 49.00	0.5548	NS
Longa
30m vs. 60m	-5.447	-53.91 to 43.02	0.9553	NS
30m vs. 90m	-17.51	-69.32 to 34.30	0.6677	NS
60m vs. 90m	-12.06	-60.52 to 36.40	0.8012	NS
Koizumi
30m vs. 60m	3.519	-42.82 to 49.86	0.9793	NS
30m vs. 90m	20.65	-25.69 to 66.99	0.5018	NS
60m vs. 90m	17.13	-23.00 to 57.26	0.5299	NS
Figure S2B
Two-Way Anova (Perfusion)	P Val	Symbol	DF	F (DFn, DFd)
Interaction	0.2144	NS	2	F (2, 84) = 1.569
Ischemic Duration	0.3864	NS	2	F (2, 84) = 0.9617
Reperfusion	0.0971	NS	1	F (1, 84) = 2.815
Tukey's Mulitple Comparison	Diff	CI	Adj P Val	Symbol
30m
Longa vs. Koizumi	0.04374	-0.01512 to 0.1026	0.1432	NS
60m
Longa vs. Koizumi	-0.01356	-0.07241 to 0.04530	0.6481	NS
90m
Longa vs. Koizumi	0.05584	-0.003020 to 0.1147	0.0627	NS
Longa
30m vs. 60m	0.05236	-0.01825 to 0.1230	0.1862	NS
30m vs. 90m	-0.008677	-0.07929 to 0.06194	0.9537	NS
60m vs. 90m	-0.06104	-0.1317 to 0.009575	0.104	NS
Koizumi
30m vs. 60m	-0.004926	-0.07554 to 0.06569	0.9848	NS
30m vs. 90m	0.003424	-0.06719 to 0.07404	0.9927	NS
60m vs. 90m	0.008349	-0.06227 to 0.07897	0.9571	NS
Figure S2C
Two-Way Anova (% Baseline)	P Val	Symbol	DF	F (DFn, DFd)
Interaction	0.8068	NS	2	F (2, 84) = 0.2153
Ischemic Duration	0.62	NS	2	F (2, 84) = 0.4808
Reperfusion	0.0002	***	1	F (1, 84) = 15.62
Tukey's Mulitple Comparison	Diff	CI	Adj P Val	Symbol
30m
Longa vs. Koizumi	0.2001	0.04851 to 0.3517	0.0103	*
60m
Longa vs. Koizumi	0.1337	-0.01789 to 0.2853	0.0831	NS
90m
Longa vs. Koizumi	0.1881	0.03645 to 0.3397	0.0157	*
Longa
30m vs. 60m	0.01533	-0.1666 to 0.1972	0.978	NS
30m vs. 90m	-0.046	-0.2279 to 0.1359	0.8187	NS
60m vs. 90m	-0.06133	-0.2432 to 0.1206	0.7014	NS
Koizumi
30m vs. 60m	-0.05107	-0.2330 to 0.1308	0.7816	NS
30m vs. 90m	-0.05805	-0.2400 to 0.1239	0.7276	NS
60m vs. 90m	-0.006983	-0.1889 to 0.1749	0.9954	NS
Figure S2D (Baseline - Red)
Two-Way Anova (% Pixels)	P Val	Symbol	DF	F (DFn, DFd)
Interaction	0.8104	NS	2	F (2, 84) = 0.2107
Ischemic Duration	0.3114	NS	2	F (2, 84) = 1.183
Reperfusion	0.4446	NS	1	F (1, 84) = 0.5898
Tukey's Mulitple Comparison	Diff	CI	Adj P Val	Symbol
30m
Longa vs. Koizumi	-0.006568	-0.02081 to 0.007678	0.3619	NS
60m
Longa vs. Koizumi	-0.00296	-0.01721 to 0.01129	0.6805	NS
90m
Longa vs. Koizumi	-1.274e-06	-0.01425 to 0.01424	0.9999	NS
Longa
30m vs. 60m	-0.00889	-0.02598 to 0.008202	0.4326	NS
30m vs. 90m	-0.009632	-0.02672 to 0.007460	0.3748	NS
60m vs. 90m	-0.0007419	-0.01783 to 0.01635	0.9941	NS
Koizumi
30m vs. 60m	-0.005283	-0.02238 to 0.01181	0.742	NS
30m vs. 90m	-0.003066	-0.02016 to 0.01403	0.9041	NS
60m vs. 90m	0.002217	-0.01488 to 0.01931	0.9486	NS
Figure S2D (Baseline - Yellow)
Two-Way Anova (% Pixels)	P Val	Symbol	DF	F (DFn, DFd)
Interaction	0.1254	NS	2	F (2, 84) = 2.128
Ischemic Duration	0.8142	NS	2	F (2, 84) = 0.2061
Reperfusion	0.043	*	1	F (1, 84) = 4.224
Tukey's Mulitple Comparison	Diff	CI	Adj P Val	Symbol
30m
Longa vs. Koizumi	0.008956	0.002692 to 0.01522	0.0056	**
60m
Longa vs. Koizumi	0.001957	-0.004306 to 0.008220	0.536	NS
90m
Longa vs. Koizumi	0.000299	-0.005964 to 0.006562	0.9246	NS
Longa
30m vs. 60m	0.004629	-0.002886 to 0.01214	0.3107	NS
30m vs. 90m	0.005653	-0.001862 to 0.01317	0.1776	NS
60m vs. 90m	0.001024	-0.006491 to 0.008539	0.9434	NS
Koizumi
30m vs. 60m	-0.00237	-0.009885 to 0.005145	0.7329	NS
30m vs. 90m	-0.003004	-0.01052 to 0.004511	0.608	NS
60m vs. 90m	-0.000634	-0.008149 to 0.006881	0.9779	NS
Figure S2D (Baseline - Green)
Two-Way Anova (% Pixels)	P Val	Symbol	DF	F (DFn, DFd)
Interaction	0.9589	NS	2	F (2, 84) = 0.04203
Ischemic Duration	0.7401	NS	2	F (2, 84) = 0.3020
Reperfusion	0.3485	NS	1	F (1, 84) = 0.8889
Tukey's Mulitple Comparison	Diff	CI	Adj P Val	Symbol
30m
Longa vs. Koizumi	0.001231	-0.002589 to 0.005052	0.5234	NS
60m
Longa vs. Koizumi	0.001313	-0.002508 to 0.005133	0.4963	NS
90m
Longa vs. Koizumi	0.0005934	-0.003227 to 0.004414	0.7582	NS
Longa
30m vs. 60m	0.0008947	-0.003689 to 0.005479	0.8875	NS
30m vs. 90m	0.00121	-0.003374 to 0.005794	0.8041	NS
60m vs. 90m	0.0003157	-0.004268 to 0.004900	0.9852	NS
Koizumi
30m vs. 60m	0.0009765	-0.003607 to 0.005560	0.8675	NS
30m vs. 90m	0.0005727	-0.004011 to 0.005157	0.9522	NS
60m vs. 90m	-0.0004038	-0.004988 to 0.004180	0.976	NS
Figure S2D (Baseline - Cyan)
Two-Way Anova (% Pixels)	P Val	Symbol	DF	F (DFn, DFd)
Interaction	0.6869	NS	2	F (2, 84) = 0.3772
Ischemic Duration	0.4236	NS	2	F (2, 84) = 0.8679
Reperfusion	0.3244	NS	1	F (1, 84) = 0.9825
Tukey's Mulitple Comparison	Diff	CI	Adj P Val	Symbol
30m
Longa vs. Koizumi	-0.0008956	-0.002302 to 0.0005111	0.209	NS
60m
Longa vs. Koizumi	-6.955e-05	-0.001476 to 0.001337	0.9219	NS
90m
Longa vs. Koizumi	-0.0002492	-0.001656 to 0.001157	0.7255	NS
Longa
30m vs. 60m	0.0002314	-0.001456 to 0.001919	0.9427	NS
30m vs. 90m	0.0001182	-0.001570 to 0.001806	0.9847	NS
60m vs. 90m	-0.0001132	-0.001801 to 0.001575	0.986	NS
Koizumi
30m vs. 60m	0.001058	-0.0006303 to 0.002745	0.2985	NS
30m vs. 90m	0.0007647	-0.0009231 to 0.002452	0.5285	NS
60m vs. 90m	-0.0002928	-0.001981 to 0.001395	0.91	NS
Figure S2D (Baseline - Blue)
Two-Way Anova (% Pixels)	P Val	Symbol	DF	F (DFn, DFd)
Interaction	0.8386	NS	2	F (2, 84) = 0.1764
Ischemic Duration	0.117	NS	2	F (2, 84) = 2.202
Reperfusion	0.5136	NS	1	F (1, 84) = 0.4303
Tukey's Mulitple Comparison	Diff	CI	Adj P Val	Symbol
30m
Longa vs. Koizumi	-0.002723	-0.009034 to 0.003587	0.3932	NS
60m
Longa vs. Koizumi	-0.0002403	-0.006551 to 0.006071	0.9398	NS
90m
Longa vs. Koizumi	-0.0006419	-0.006953 to 0.005669	0.8402	NS
Longa
30m vs. 60m	0.003136	-0.004436 to 0.01071	0.5864	NS
30m vs. 90m	0.002651	-0.004921 to 0.01022	0.6822	NS
60m vs. 90m	-0.0004847	-0.008057 to 0.007087	0.9872	NS
Koizumi
30m vs. 60m	0.005619	-0.001953 to 0.01319	0.1858	NS
30m vs. 90m	0.004732	-0.002839 to 0.01230	0.3003	NS
60m vs. 90m	-0.0008864	-0.008458 to 0.006685	0.9579	NS
Figure S2E
Two-Way Anova (Speckle Score)	P Val	Symbol	DF	F (DFn, DFd)
Interaction	0.9724	NS	2	F (2, 84) = 0.02802
Ischemic Duration	0.1914	NS	2	F (2, 84) = 1.686
Reperfusion	0.9858	NS	1	F (1, 84) = 0.0003200
Tukey's Mulitple Comparison	Diff	CI	Adj P Val	Symbol
30m
Longa vs. Koizumi	0.002162	-0.03499 to 0.03932	0.9081	NS
60m
Longa vs. Koizumi	-0.003413	-0.04057 to 0.03374	0.8555	NS
90m
Longa vs. Koizumi	0.00183	-0.03532 to 0.03898	0.9222	NS
Longa
30m vs. 60m	-0.01965	-0.06423 to 0.02492	0.5464	NS
30m vs. 90m	-0.01903	-0.06361 to 0.02554	0.5672	NS
60m vs. 90m	0.0006229	-0.04395 to 0.04520	0.9994	NS
Koizumi
30m vs. 60m	-0.02523	-0.06981 to 0.01935	0.3716	NS
30m vs. 90m	-0.01936	-0.06394 to 0.02521	0.5561	NS
60m vs. 90m	0.005865	-0.03871 to 0.05044	0.9472	NS
Figure S3A (24h)
Two-Way Anova (Laterality Difference)	P Val	Symbol	DF	F (DFn, DFd)
Interaction	0.265	NS	2	F (2, 84) = 1.349
Ischemic Duration	0.8198	NS	2	F (2, 84) = 0.1991
Reperfusion	0.8145	NS	1	F (1, 84) = 0.05537
Tukey's Mulitple Comparison	Diff	CI	Adj P Val	Symbol
30m
Koizumi vs. Longa	0.04	-0.2238 to 0.3038	0.7637	NS
60m
Koizumi vs. Longa	-0.1459	-0.4096 to 0.1179	0.2747	NS
90m
Koizumi vs. Longa	0.1599	-0.1039 to 0.4237	0.2314	NS
Koizumi
30m vs. 60m	0.03848	-0.2780 to 0.3550	0.9547	NS
30m vs. 90m	-0.1073	-0.4238 to 0.2092	0.6986	NS
60m vs. 90m	-0.1458	-0.4623 to 0.1707	0.5174	NS
Longa
30m vs. 60m	-0.1474	-0.4639 to 0.1691	0.51	NS
30m vs. 90m	0.01263	-0.3039 to 0.3291	0.995	NS
60m vs. 90m	0.16	-0.1565 to 0.4765	0.4529	NS
Figure S3A (72h)
Two-Way Anova (Speckle Score)	P Val	Symbol	DF	F (DFn, DFd)
Interaction	0.5419	NS	2	F (2, 84) = 0.6172
Ischemic Duration	0.0208	*	2	F (2, 84) = 4.055
Reperfusion	0.8158	NS	1	F (1, 84) = 0.05461
Tukey's Mulitple Comparison	Diff	CI	Adj P Val	Symbol
30m
Koizumi vs. Longa	0.007778	-0.2627 to 0.2783	0.9545	NS
60m
Koizumi vs. Longa	-0.08283	-0.3533 to 0.1877	0.5442	NS
90m
Koizumi vs. Longa	0.1301	-0.1404 to 0.4006	0.3416	NS
Koizumi
30m vs. 60m	-0.2282	-0.5527 to 0.09634	0.2198	NS
30m vs. 90m	-0.2106	-0.5351 to 0.1139	0.2738	NS
60m vs. 90m	0.01758	-0.3069 to 0.3421	0.9908	NS
Longa
30m vs. 60m	-0.3188	-0.6433 to 0.005737	0.0553	NS
30m vs. 90m	-0.08828	-0.4128 to 0.2362	0.7934	NS
60m vs. 90m	0.2305	-0.09402 to 0.5550	0.2132	NS
